# Supplementary material for: New loci for body fat percentage reveal link between adiposity and cardiometabolic disease risk
Source: PubMed Central journal article supplement (PMC4740398; doi:10.1038/ncomms10495), 2016-02-01
Supplement: ncomms10495-s1.pdf [file ncomms10495-s1.pdf]

# Supplementary Figures

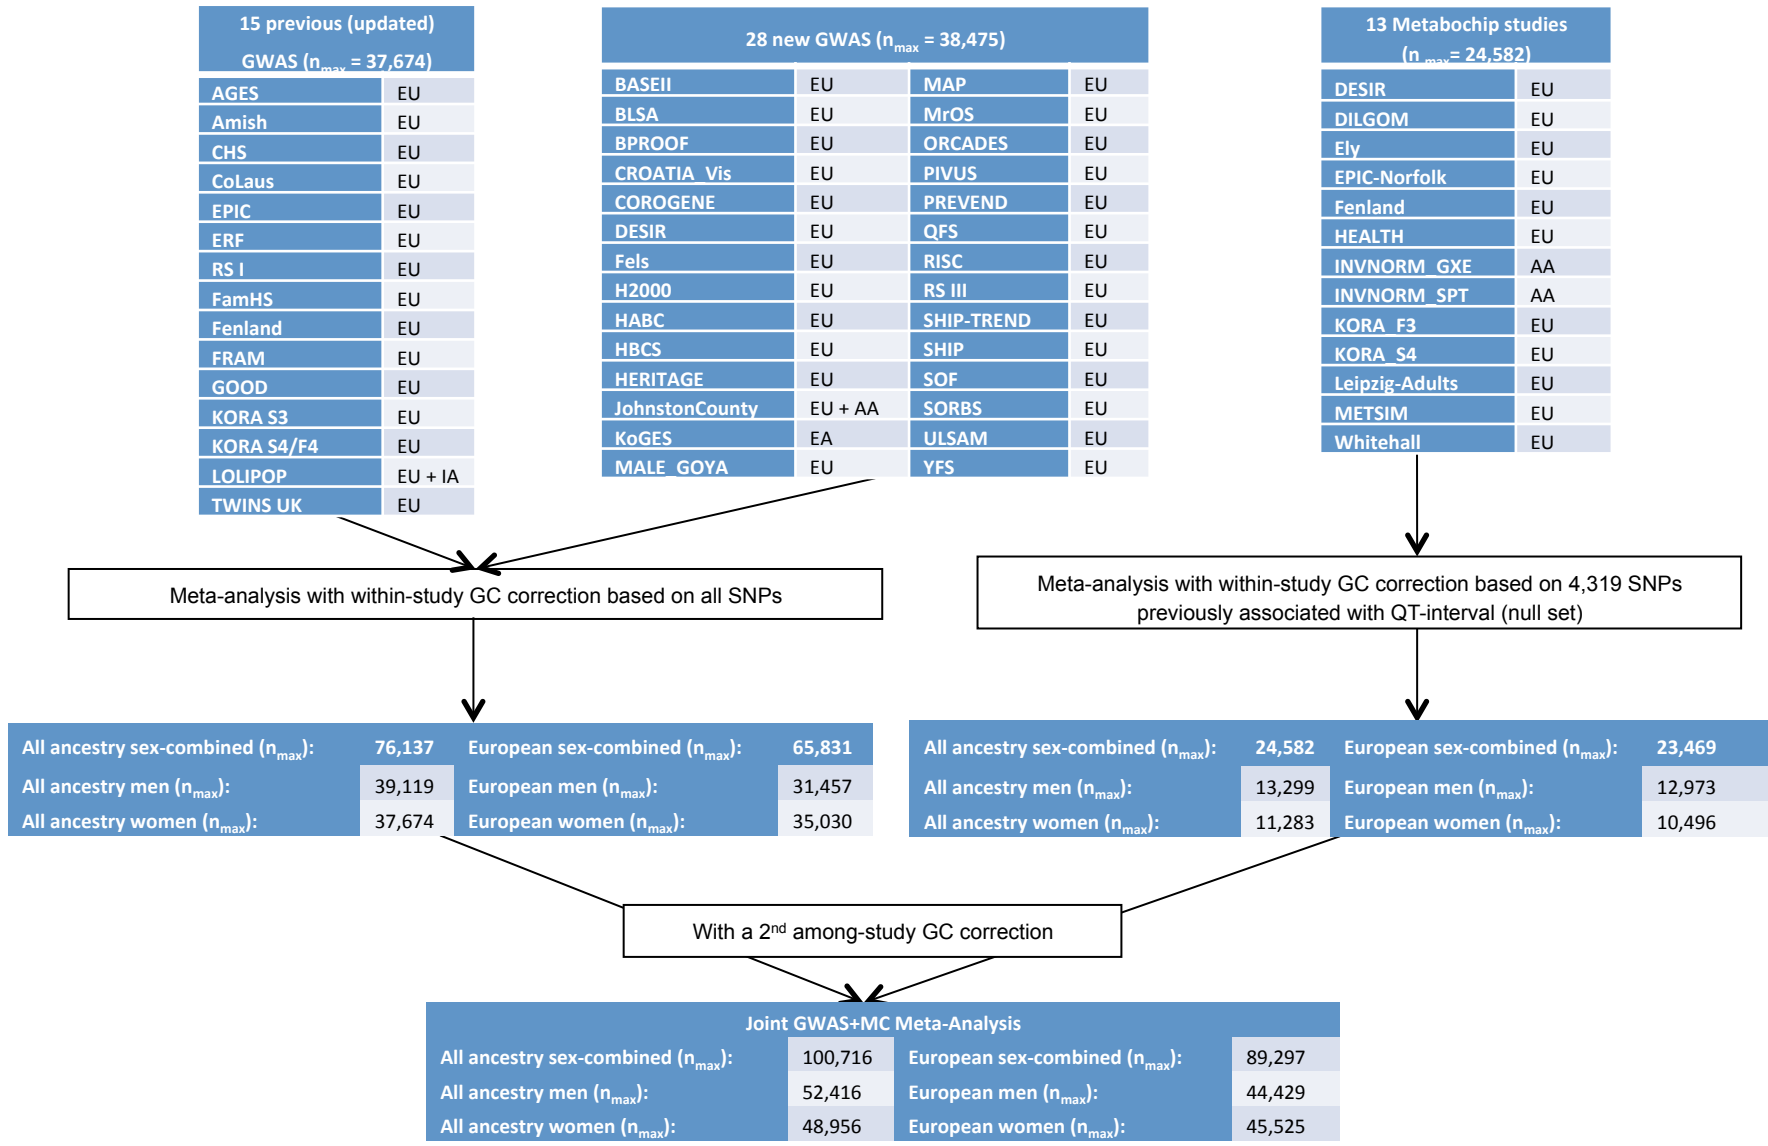

**Supplementary Figure 1. Study design and participating cohorts.** Counts represented the maximum number in the respective strata of analysis. EU: European or European American, IA: Indian Asian, AA: African American, EA: Eastern Asian.

A

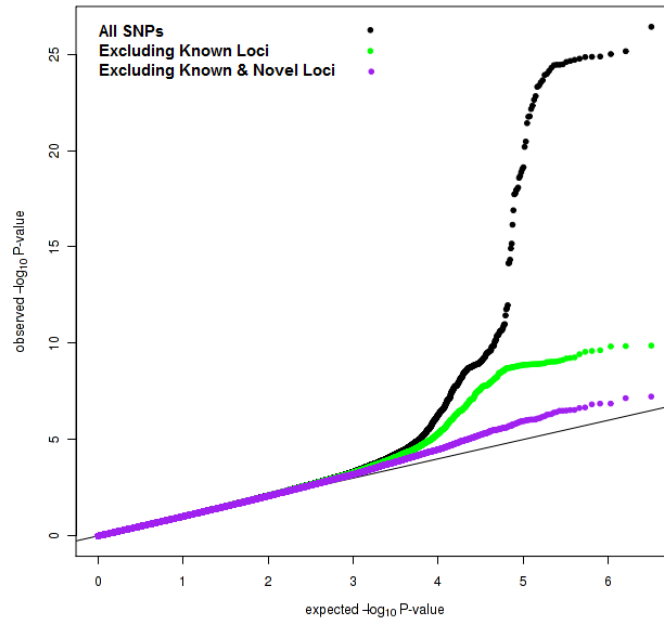

B

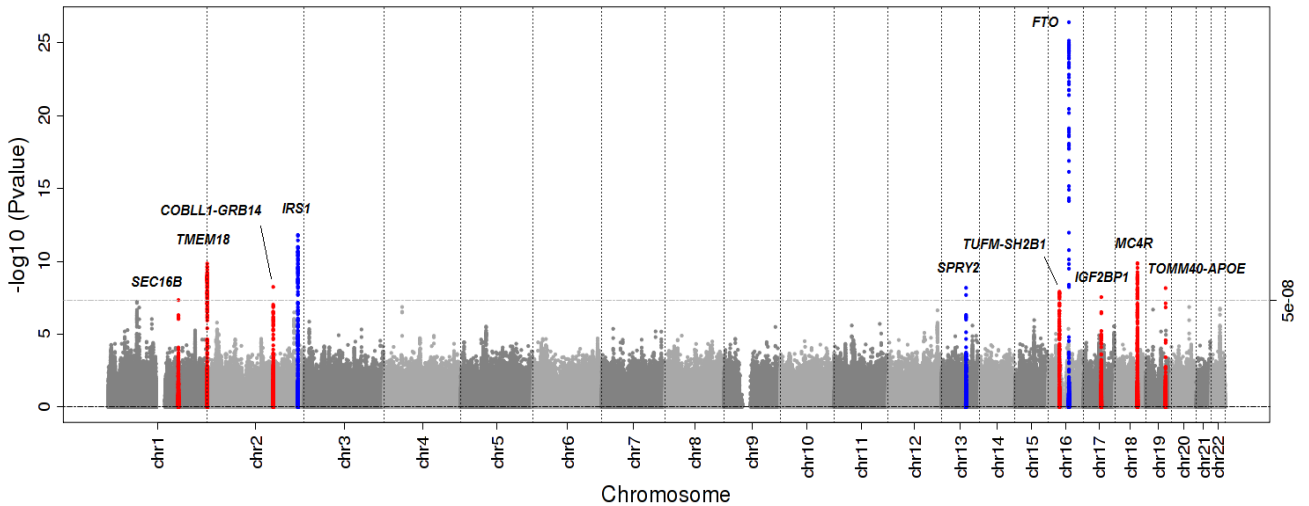

**Supplemental Figure 2. Summary plots of all-ancestry sex-combined body fat percentage meta-analysis.** A. Quantile-quantile plot of SNP associations. All SNPs were plotted in black; after removing all SNPs within 500 kb of the previously reported loci, the remaining SNPs were plotted in green; and after removing all SNPs within 500 kb of the previously reported loci and also novel loci, the remaining SNPs were plotted in purple. The genomic control value ( $\lambda_{GC}$ ) was 1.002. The uniform null distribution was marked with a solid black line. B. Manhattan plot of association statistics ( $-\log_{10}(P \text{ values})$ ) showing previously reported loci in blue and novel loci in red.

A

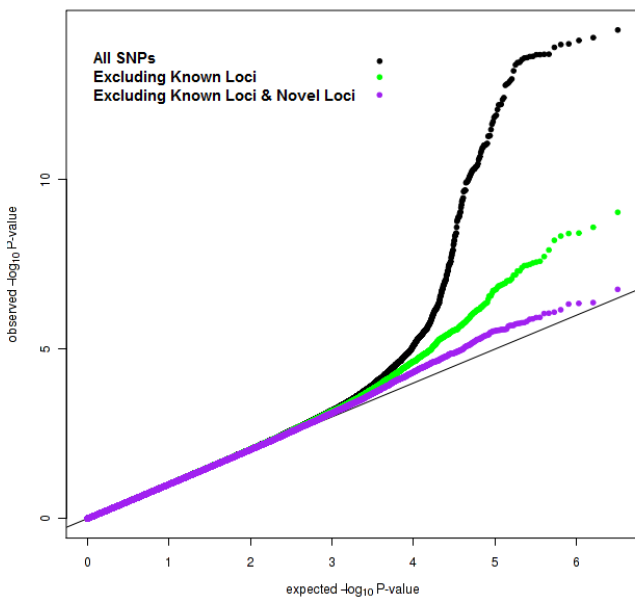

B

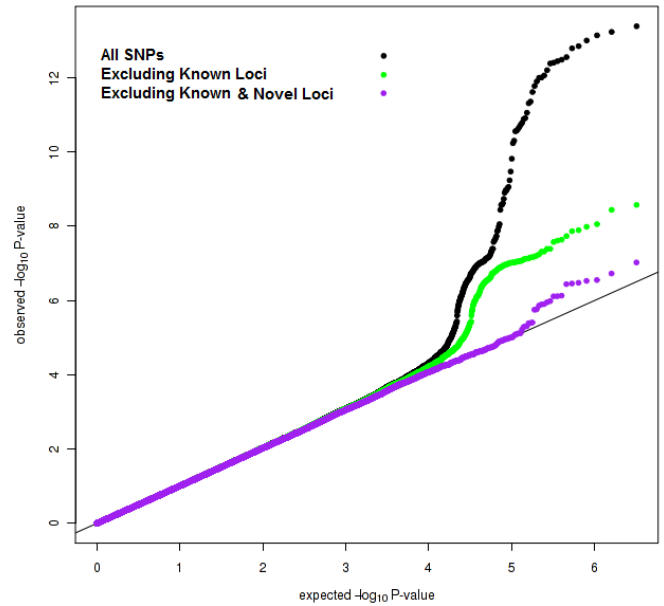

C

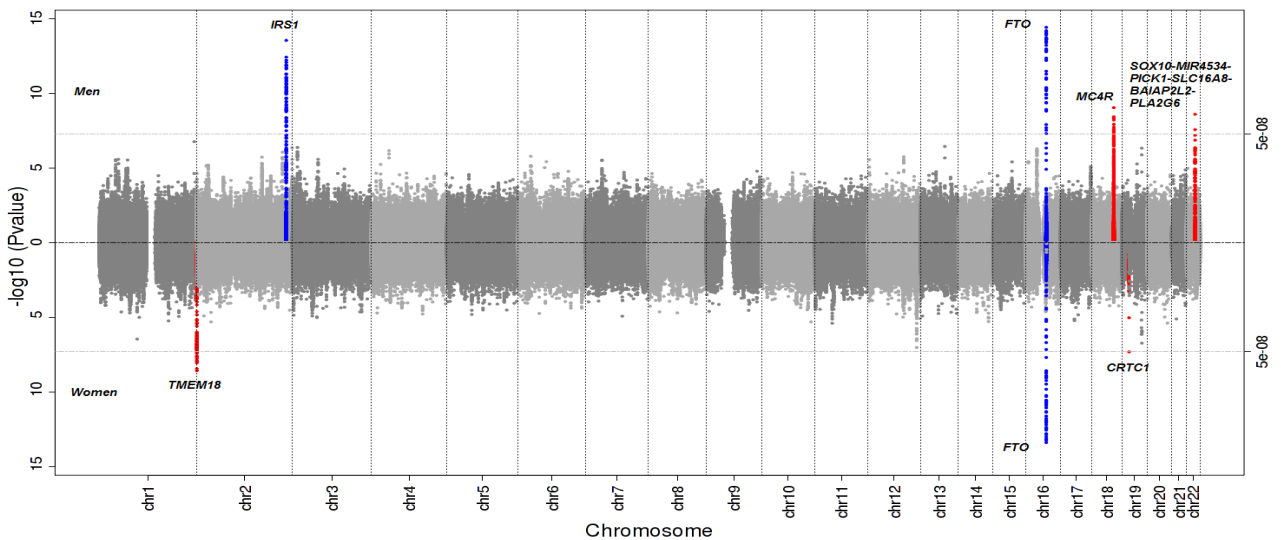

**Supplemental Figure 3. Summary plots of all-ancestry sex-specific body fat percentage meta-analysis.** A. Quantile-quantile plot of SNP associations for men-specific meta-analysis ( $\lambda_{GC} = 1.002$ ). B. Quantile-quantile plot of SNP associations for women-specific meta-analysis ( $\lambda_{GC} = 1.001$ ). All SNPs were plotted in black; after removing all SNPs within 500 kb of the previously reported loci, the remaining SNPs were plotted in green; and after removing all SNPs within 500 kb of the previously reported loci and also novel loci, the remaining SNPs were plotted in purple. The uniform null distribution was marked with a solid black line. C. Manhattan plot of association statistics ( $-\log_{10}(P \text{ values})$ ) for men and women. Previously reported loci were in blue, and novel associations identified in the sex-specific analysis were in red.

A

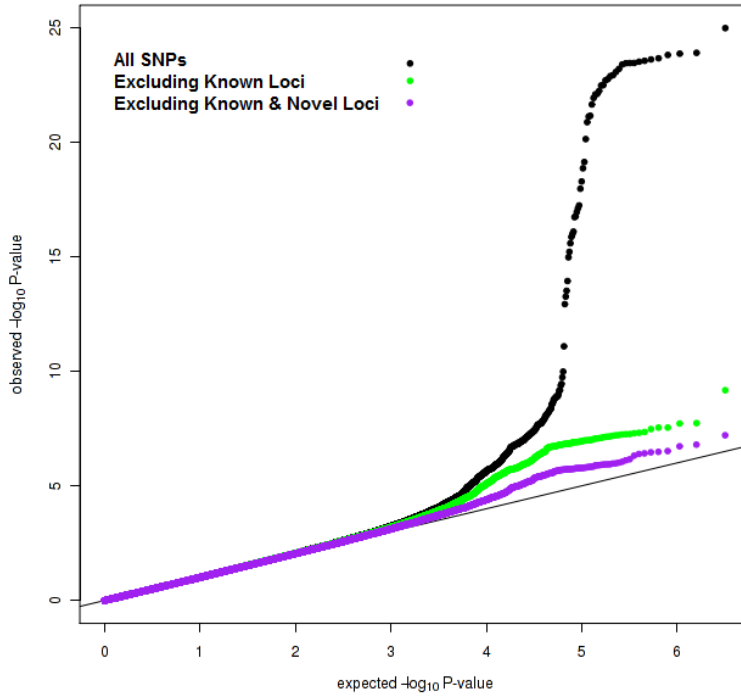

B

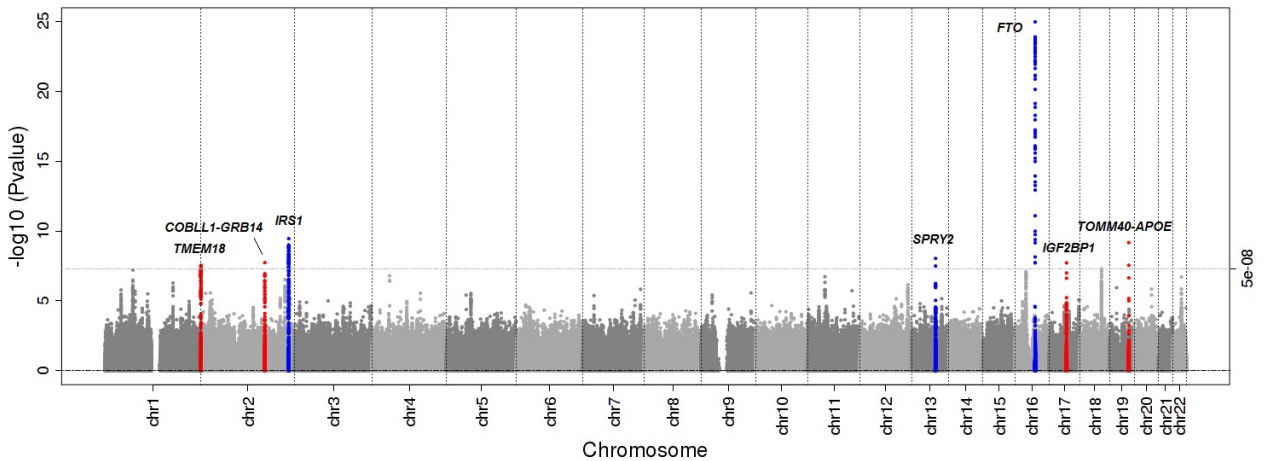

**Supplemental Figure 4. Summary plots of European sex-combined body fat percentage meta-analysis.** A. Quantile-quantile plot of SNP associations. All SNPs were plotted in black; after removing all SNPs within 500 kb of the previously reported loci, the remaining SNPs were plotted in green; and after removing all SNPs within 500 kb of the previously reported loci and also novel loci, the remaining SNPs were plotted in purple. The genomic control value ( $\lambda_{GC}$ ) was 1.006. The uniform null distribution was marked with a solid black line. B. Manhattan plot of association statistics ( $-\log_{10}(P \text{ values})$ ) showing previously reported loci in blue and novel loci in red.

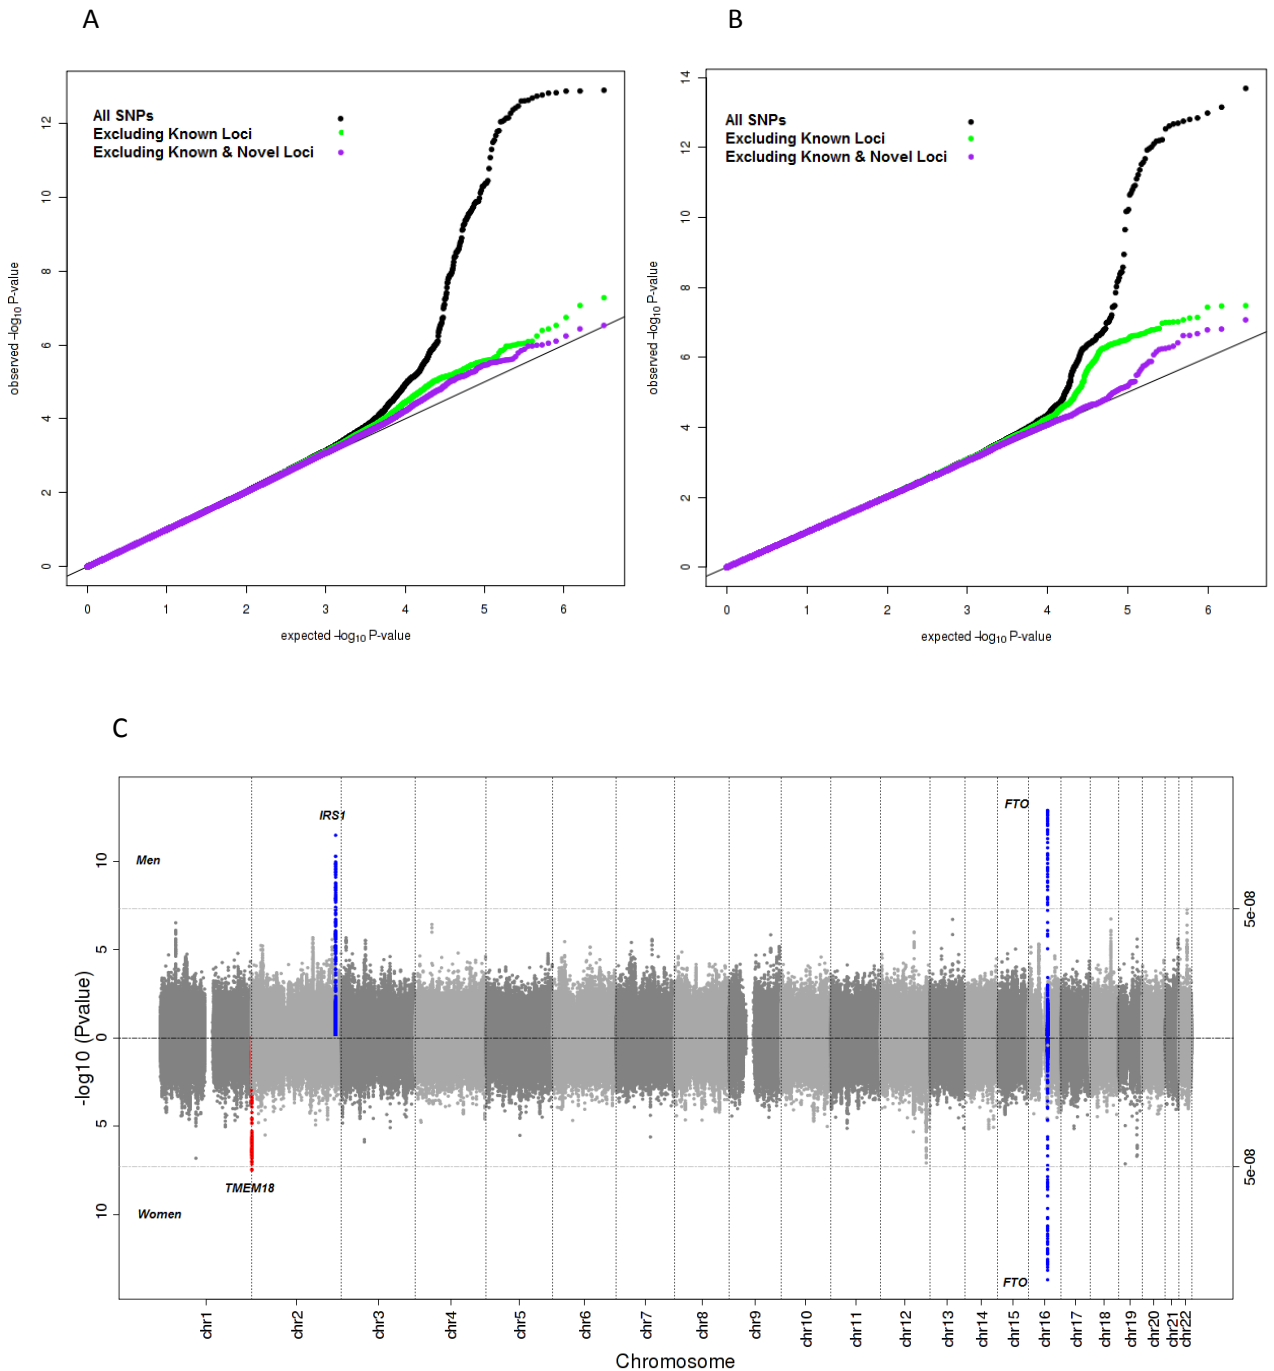

**Supplemental Figure 5. Summary plots of European sex-specific body fat percentage meta-analysis.** A. Quantile-quantile plot of SNP associations for men-specific meta-analysis ( $\lambda_{GC} = 1.001$ ). B. Quantile-quantile plot of SNP associations for women-specific meta-analysis ( $\lambda_{GC} = 1.003$ ). All SNPs were plotted in black; after removing all SNPs within 500 kb of the previously reported loci, the remaining SNPs were plotted in green; and after removing all SNPs within 500 kb of the previously reported loci and also novel loci, the remaining SNPs were plotted in purple. The uniform null distribution was marked with a solid black line. C. Manhattan plot of association statistics ( $-\log_{10}(P \text{ values})$ ) for men and women. Previously reported loci were in blue, and novel associations identified in the sex-specific analysis were in red.

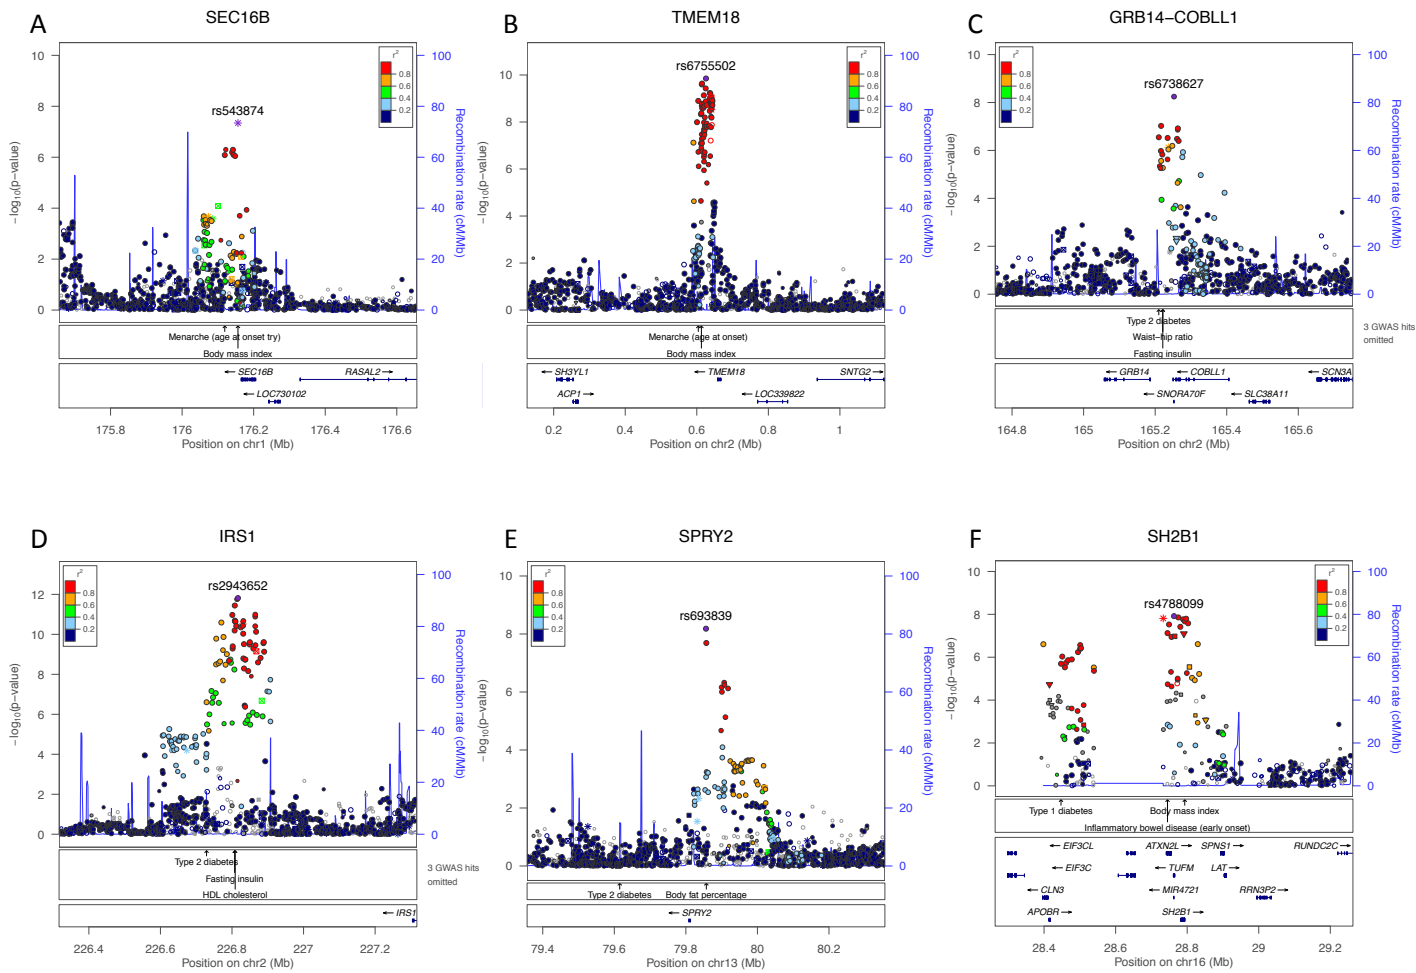

**Supplemental Figure 6. Regional plots of the 12 identified loci that reached genome-wide significant association with body fat percentage in all-ancestry analyses (sex-combined: A-I, K; in men for the PLA2G6 loci: L; and in women for the CRTCL1 loci: J).** Each symbol represents the significance ( $P$  value on a  $-\log_{10}$  scale) of a SNP with body fat percentage as a function of the SNP's genomic position (NCBI Build 36). For each locus, the index SNP is represented in the purple color. The color of all other SNPs indicates LD with the index SNP (estimated by CEU  $r^2$  from the HapMap Project data Phase II CEU). Recombination rates are also estimated from International HapMap Project data, and gene annotations are obtained from the UCSC Genome Browser. GWAS catalogs SNPs with  $P$  value  $< 5 \times 10^{-8}$  are shown in the middle panel. Different shapes denote the different categories of the SNPs: up-triangle for frameshift or splice SNPs, down-triangle for nonsynonymous SNPs, square for coding or UTR SNPs; star for SNPs in tfbscons region, square filled with "X" symbol for SNPs located in mcs44placental region, and circle for SNPs with no annotation information.

# Supplementary Figure 6 (Continued)

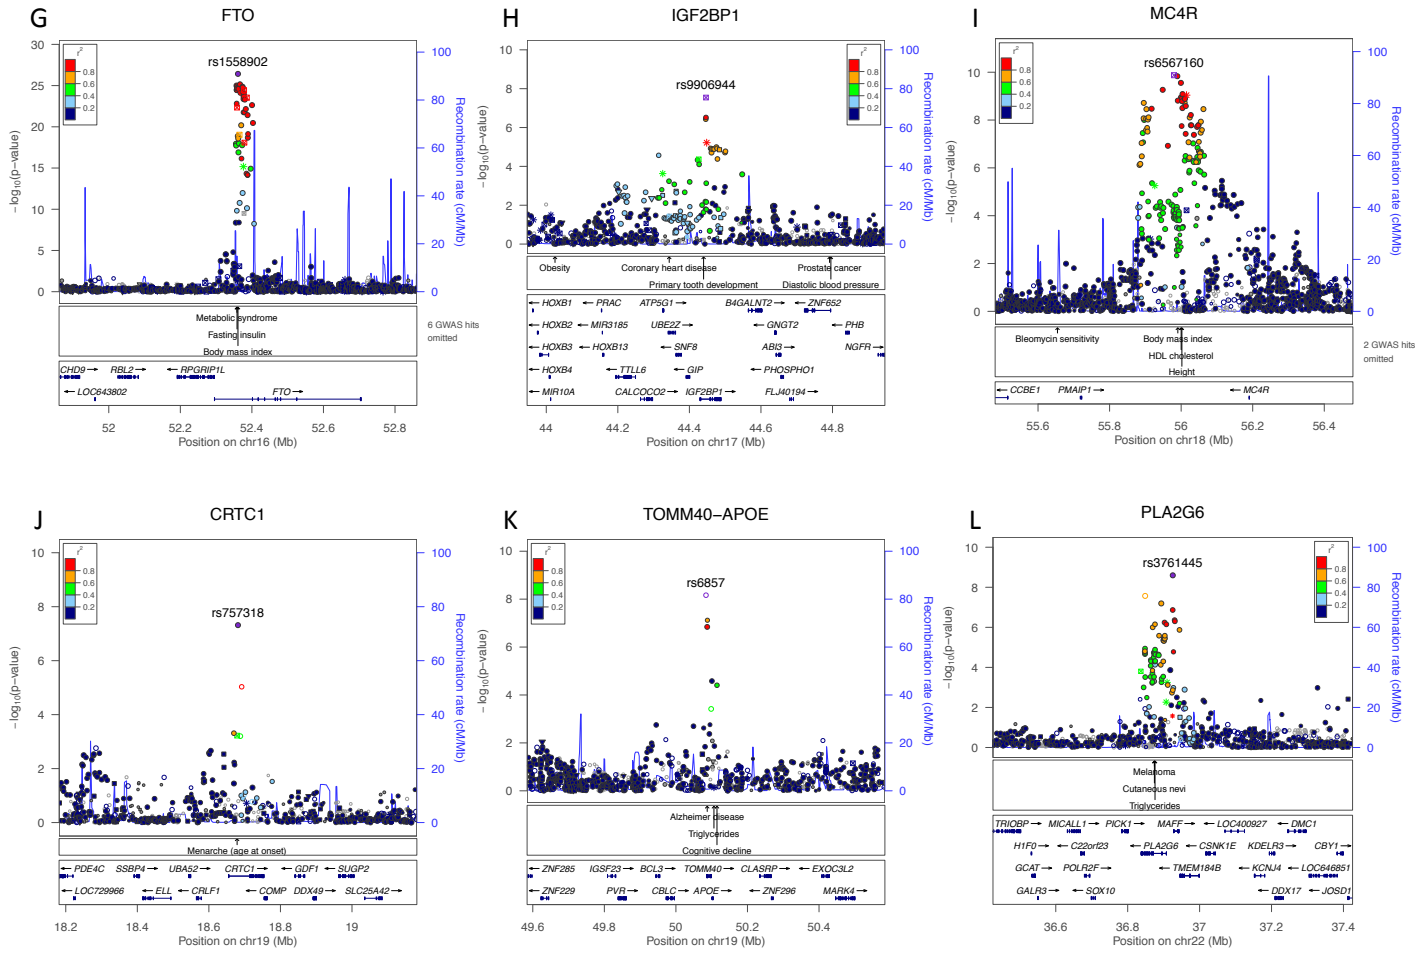

# TOMM40 - APOE

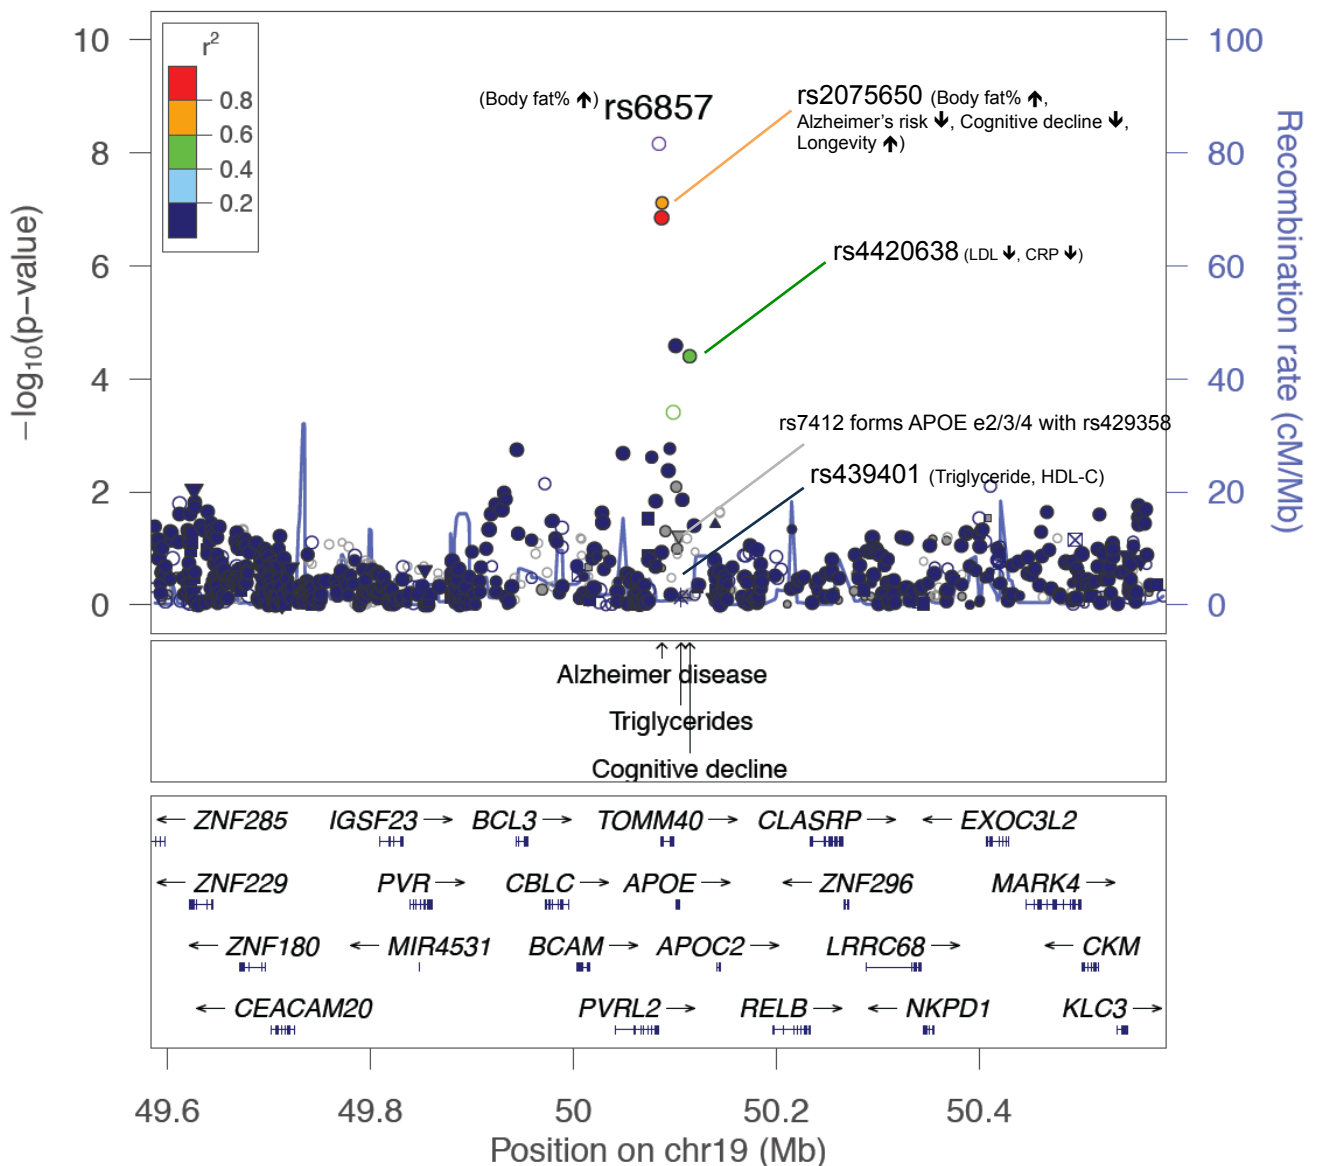

**Supplemental Figure 7. Regional plots of the TOMM40-APOE loci that reached genome-wide significant association with body fat percentage in all-ancestry sex-combined analyses.** Each symbol represents the significance ( $P$  value on a  $-\log_{10}$  scale) of a SNP with body fat percentage as a function of the SNP's genomic position (NCBI Build 36). For each locus, the index SNP is represented in the purple color. The color of all other SNPs indicates LD with the index SNP (estimated by CEU  $r^2$  from the HapMap Project data Phase II CEU). Recombination rates are also estimated from International HapMap Project data, and gene annotations are obtained from the UCSC Genome Browser. The known SNPs with genome-wide significant associations with different traits are also shown in the upper panel. GWAS catalogs SNPs with  $P$  value  $< 5 \times 10^{-8}$  are shown in the middle panel. Different shapes denote the different categories of the SNPs: up-triangle for framestop or splice SNPs, down-triangle for nonsynonymous SNPs, square for coding or UTR SNPs; star for SNPs in tfscons region, square filled with "X" symbol for SNPs located in mcs44placental region, and circle for SNPs with no annotation information.



| Motifs       |                          |       |                |                                                                                      |           | Filter: <input type="text"/> |
|--------------|--------------------------|-------|----------------|--------------------------------------------------------------------------------------|-----------|------------------------------|
| Method       | Location                 | Motif | ? Cell Type    | PWM                                                                                  | Reference |                              |
| Footprinting | chr22:38572437..38572459 | HEN1  | Melano         |    | 21106904  |                              |
| Footprinting | chr22:38572437..38572459 | HEN1  | Panisd         |    | 21106904  |                              |
| Footprinting | chr22:38572437..38572459 | HEN1  | Huvec          |    | 21106904  |                              |
| Footprinting | chr22:38572437..38572459 | HEN1  | Hsmmt          |    | 21106904  |                              |
| Footprinting | chr22:38572437..38572459 | HEN1  | Hsmm           |    | 21106904  |                              |
| Footprinting | chr22:38572437..38572459 | HEN1  | Hmec           |    | 21106904  |                              |
| Footprinting | chr22:38572437..38572459 | HEN1  | Gm18507        |    | 21106904  |                              |
| Footprinting | chr22:38572437..38572459 | HEN1  | AosmcSerumfree |    | 21106904  |                              |
| Footprinting | chr22:38572437..38572459 | HEN1  | Fibrop         |  | 21106904  |                              |
| Footprinting | chr22:38572437..38572459 | HEN1  | Gm12891        |  | 21106904  |                              |
| Footprinting | chr22:38572437..38572459 | HEN1  | Gm12892        |  | 21106904  |                              |
| PWM          | chr22:38572437..38572459 | HEN1  |                |  | 16381825  |                              |

**Supplemental Figure 8. HEN1 binding motif at rs4383.** RegulomeDB was searched for SNPs in high LD ( $r^2 > 0.7$ , 1000 Genomes Project) with rs3761445 (*PLA2G6* region). The SNP of rs4843 is located in a HEN binding motif and DNaseI footprints in multiple cell types.

Supplementary Table 1. Study design, number of individuals and sample quality control for genome-wide association studies and metabochip studies

| Study                                  | Full name                                                                                                                                                                                     | Study design                         | Ethnicity        | Total sample size (N) | Call rate* | Sample QC<br>Other exclusions                                                                                                                                                                                                                                            | Samples in analyses (N) | Fat % assessment | Instrument                                                         | References                                                                                                                                                                                                                                                                                                                                                                                                                                    |
|----------------------------------------|-----------------------------------------------------------------------------------------------------------------------------------------------------------------------------------------------|--------------------------------------|------------------|-----------------------|------------|--------------------------------------------------------------------------------------------------------------------------------------------------------------------------------------------------------------------------------------------------------------------------|-------------------------|------------------|--------------------------------------------------------------------|-----------------------------------------------------------------------------------------------------------------------------------------------------------------------------------------------------------------------------------------------------------------------------------------------------------------------------------------------------------------------------------------------------------------------------------------------|
| <b>Genome-wide Association Studies</b> |                                                                                                                                                                                               |                                      |                  |                       |            |                                                                                                                                                                                                                                                                          |                         |                  |                                                                    |                                                                                                                                                                                                                                                                                                                                                                                                                                               |
| AGES                                   | Age, Gene/Environment Susceptibility                                                                                                                                                          | Population-based                     | European descent | 3,219                 | ≥ 97%      | 1) mismatch with previous genotypes<br>2) remove ATT & G/C SNPs<br>3) remove SNPs not in HapMap                                                                                                                                                                          | 2,375                   | Bioimpedance     | A Xitron HYDRA ECF/ICF, Model 4200                                 | [PMID: 17351290]<br>Harris T, et al. Age, Gene/Environment Susceptibility-Reykjavik Study: multidisciplinary applied phenomics. American Journal of Epidemiology 165, 1076–1087 (2007).                                                                                                                                                                                                                                                       |
| Amish                                  | The Old Order Amish                                                                                                                                                                           | Founder population                   | European descent | 1,186                 | ≥ 96%      | 1) failed Mendelian check<br>2) failed duplicate check<br>3) missing body fat percentage data                                                                                                                                                                            | 850                     | DEXA             | Hologic QDR-4500W                                                  | [PMID: PMC2443415]<br>Mitchell BD, et al. The genetic response to short-term interventions affecting cardiovascular function: Rationale and design of the Heredity and Phenotype Intervention (HAPI) Heart Study. Am Heart J 823, 828 (2008).                                                                                                                                                                                                 |
| BASE-II                                | Berlin Aging Study II                                                                                                                                                                         | Population-based                     | European descent | 2,085                 | ≥ 90%      | 1) heterozygosity <20% or >34%;<br>2) gender mismatches;<br>3) ethnic outliers;<br>4) related individuals and duplicates;<br>5) Missing body weight and height.                                                                                                          | 624                     | DEXA             | Hologic QDR Discovery                                              | [PMID: 23505255]<br>Bertram L, et al. Cohort Profile: The Berlin Aging Study II (BASE-II). Int J Epidemiol. 2014;43:703-12.                                                                                                                                                                                                                                                                                                                   |
| BLSA                                   | Baltimore Longitudinal Study of Aging                                                                                                                                                         | Population-based                     | European descent | 1,230                 | ≥ 98.5     | 1) ethnic outliers;<br>2) Missing body weight and height.<br>3) Sex mismatch                                                                                                                                                                                             | 844                     | DEXA             | GE Lunar Prodigy ADVANCE                                           | Shock, N.W., et al., Normal Human Aging: The Baltimore Study of Aging. 1984. NIH Publication No. 84-2450 ( <a href="http://health-equity.pitt.edu/25577">http://health-equity.pitt.edu/25577</a> )                                                                                                                                                                                                                                            |
| B-PROOF                                | B-vitamins for the prevention of osteoporotic fractures                                                                                                                                       | RCT                                  | European descent | 2,891                 | >97.5%     | 1) Excess heterozygosity (F-values smaller than the mean-(4*SD))<br>2) Gender mismatch<br>3) Non-Caucasian<br>4) Familial relationships<br>5) No body composition data available                                                                                         | 1,075                   | DEXA             | GE Lunar Prodigy/Hologic Delphi                                    | [PMID:22136481]<br>Rationale and design of the B-PROOF study, a randomized controlled trial on the effect of supplemental intake of vitamin B12 and folic acid on fracture incidence. van Wijngaarden JP, Dhonukshe-Rutten RA, van Schoor NM, van der Velde N, Swart KM, Ennenman AW, van Dijk SC, Brouwer-Brolsma EM, Zillikens MC, van Meurs JB, Brug J, Uitterlinden AG, Lips P, de Groot LC. BMC Geriatr. 2011;11:80.<br>[PMID: 11454111] |
| CHS                                    | Cardiovascular Health Study                                                                                                                                                                   | Population-based cohort study        | Caucasian        | 4925                  | >95%       | 1) prevalent clinical CVD<br>2) sex mismatch<br>3) discordance with prior genotyping<br>4) no DEXA scan done                                                                                                                                                             | 921                     | DEXA             | Hologic QDR-2000 Bone densitometer                                 | Robbins J, et al. The association of bone mineral density and depression in an older population. J Am Geriatr Soc 49, 732-736 (2001).<br>[PMID: 1669507]<br>Fried LP, et al. The Cardiovascular Health Study: design and rationale. Ann Epidemiol 1, 263-276 (1991).                                                                                                                                                                          |
| CoLaus                                 | Cohort Lausannoise                                                                                                                                                                            | Population-based                     | European descent | 6,188                 | ≥ 90%      | 1) ethnic outliers<br>2) related individuals and duplicates<br>3) missing body fat percentage data                                                                                                                                                                       | 5,389                   | Bioimpedance     | Bodystat 1500 Analyzer                                             | [PMID: 18366642]<br>Firmann J, et al. The CoLaus study: a population-based study to investigate the epidemiology and genetic determinants of cardiovascular risk factors and metabolic syndrome. BMC Cardiovasc Dis, 8, 6 (2008).                                                                                                                                                                                                             |
| COROGENE CONTROLS                      | COROGENE-CONTROL Genetic Predisposition of Coronary Heart Disease in Patients Verified with Coronary Angiogram. CONTROLS (The FINRISK study). *Corogene controls are nicked from the National | Population-based                     | European descent | 2,051                 | ≥ 95%      | 1) heterozygosity, gender check and relatedness checks have been performed and any discrepancies have been removed.<br>2) Missing phenotype.                                                                                                                             | 641                     | Bioimpedance     | TANITA TBF-300MA                                                   | Peltonen, M., Harald, K., Männistö, S., Saarikoski, L., Peltomäki, P., Lund, L., et al. (2008). The National FINRISK 2007 Study. Helsinki: Publications of the National Public Health Institute, B 34/2008.                                                                                                                                                                                                                                   |
| CROATIA-VIS                            | The CROATIA study, Vis Island cohort                                                                                                                                                          | Population-based                     | European descent | 924                   | 97%        | ethnic outliers, people with missing phenotype data                                                                                                                                                                                                                      | 903                     | Bioimpedance     | Akern bioresearch soft tissue analyzer - STA BIA (Florence, Italy) | [PMID:18327257]<br>Vitart V, et al. SLC2A9 is a newly identified urate transporter influencing serum urate concentration, urate excretion and gout. Nat Genet. 2008;40:437-42                                                                                                                                                                                                                                                                 |
| DESIR                                  | Data from an Epidemiological Study on the Insulin Resistance syndrome                                                                                                                         | Population-based                     | white European   | 731                   | ≥ 90%      | 1) Missing data;<br>2) Ethnic outliers (N=15).                                                                                                                                                                                                                           | 628                     | Bioimpedance     | TBF 300P balance from Tanita (Neuilly-sur-Seine, France)           | [PMID: 8927780]<br>Balkau B (1996) An epidemiologic survey from a network of French Health Examination Centres. (D.E.S.I.R.): epidemiologic data on the insulin resistance syndrome. Rev Epidemiol Sante Publique 44(4):373-5.                                                                                                                                                                                                                |
| EPIC-Obesity Study                     | European Prospective Investigation into Cancer and Nutrition - Obesity Study                                                                                                                  | Population-based                     | European descent | 2,566                 | ≥ 94%      | 1) heterozygosity <23% or >30%;<br>2) >5.0% discordance in SNP pairs with r2=1 in HapMap<br>3) ethnic outliers;<br>4) related individuals and duplicates;<br>5) Missing body weight and height.                                                                          | 2,543                   | Bioimpedance     | Tanita BC-531 Body Composition Monitor                             | [PMID: 10466767]<br>Day, N.E. et al. EPIC-Norfolk: study design and characteristics of the cohort. European Prospective Investigation of Cancer. British Journal of Cancer 80, 95-103 (1999).<br>[PMID: 18454148]<br>Loos, R.J. et al. Common variants near MC4R are associated with fat mass, weight and risk of obesity. Nat Genet 40, 768-775 (2008).                                                                                      |
| ERF                                    | Erasmus Rucphen Family Study                                                                                                                                                                  | Family-based                         | European descent | 2,315                 | ≥98%       | 1) gender mismatch;<br>2) ethnic outliers;<br>3) missing body fat percentage data.                                                                                                                                                                                       | 2,087                   | DEXA             | GE Lunar Prodigy                                                   | [PMID:15054401]<br>Aulchenko YS, Heutink P, Mackay I, Bertoli-Avella AM, Pullen J, et al. Linkage disequilibrium in young genetically isolated Dutch population. Eur J Hum Genet 12: 527-534 (2004).                                                                                                                                                                                                                                          |
| Fels                                   | Fels Longitudinal Study                                                                                                                                                                       | Family-based                         | European descent | 1,304                 | ≥ 90%      | 1) < 1 heterozygote<br>2) monomorphic after imputation<br>3) ethnic outliers<br>4) missing DEXA data                                                                                                                                                                     | 916                     | DEXA             | Hologic Discovery A                                                | Roche AF. Growth, maturation, and body composition : the Fels Longitudinal Study, 1929-1991. Cambridge ; New York, NY: Cambridge University Press; 1992.                                                                                                                                                                                                                                                                                      |
| FamHS                                  | Family Heart Study                                                                                                                                                                            | Population-based                     | white European   | 2,337                 | ≥ 98%      | 1) technical errors;<br>2) discrepancies between reported sex and sex-diagnostic markers;<br>3) SNPs were deleted if Mendelian errors.                                                                                                                                   | 2,337                   | Bioimpedance     | Weight Manager Version 2.05a                                       | [PMID: 8651220]<br>Higgins M, et al. NHLBI Family Heart Study: objectives and design. Am J Epidemiol. 143,1219-28 (1996).                                                                                                                                                                                                                                                                                                                     |
| Fenland                                | Fenland Stud                                                                                                                                                                                  | Population-based                     | European descent | 1,500                 | ≥ 95%      | 1) failed heterozygosity check: upperbound 0.2882, lowerbound 0.2735;<br>2) failed relatedness check (sample with lower call rate in related samples);<br>3) failed duplicate check (sample with lower call rate in duplicates);<br>4) missing body fat percentage data. | 1,402                   | DEXA             | GE Lunar Prodigy                                                   | [PMID: 20519560]<br>De Lucia Roife, E. et al. Association between birth weight and visceral fat in adults. Am J Clin Nutr. 2010;92:347-52.<br>[PMID: 19079261]<br>Willer CJ, Speliotes EK, Loos RJ, et al. Six new loci associated with body mass index highlight a neuronal influence on body weight regulation. Nat Genet 41, 25-34 (2009).<br>[PMID: 10466767]                                                                             |
| Framingham                             | Framingham Heart Study                                                                                                                                                                        | Population-based, multi-generational | European descent | 3,780                 | ≥ 97%      | 1) autosomal heterozygosity <0.33 or >0.37<br>2) ethnic outliers (using Eigenstrata)<br>3) missing body fat percentage data                                                                                                                                              | 2,748                   | DEXA             | GE Lunar DPX-L                                                     | Visser M, et al. Body fat and skeletal muscle mass in relation to physical disability in very old men and women of the Framingham Heart Study. J Gerontol 53A, M214-M221 (1998).                                                                                                                                                                                                                                                              |

|                                        |                                                                     |                                                                    |                                |       |         |                                                                                                                                                                 |       |                      |                                                                                  |                                                                                                                                                                                                                                                                                                                                                                                                                                                                                                                                                                                                                                                                                                                                     |
|----------------------------------------|---------------------------------------------------------------------|--------------------------------------------------------------------|--------------------------------|-------|---------|-----------------------------------------------------------------------------------------------------------------------------------------------------------------|-------|----------------------|----------------------------------------------------------------------------------|-------------------------------------------------------------------------------------------------------------------------------------------------------------------------------------------------------------------------------------------------------------------------------------------------------------------------------------------------------------------------------------------------------------------------------------------------------------------------------------------------------------------------------------------------------------------------------------------------------------------------------------------------------------------------------------------------------------------------------------|
| GOYA                                   | Males from Genetics of Overweight Young Adults Study                | Case Cohort                                                        | European descent               | 1,714 | ≥ 94%   | NA                                                                                                                                                              | 1,714 | Bioimpedance         | BIA-103<br>RJL-system-analyser (RJL-system Detroit)                              | [PMID: 21935397]<br>Paternoster L, Evans DM, Nohr EA, Holst C, Gaborieau V, Brennan P, Gjesing AP, Grarup N, Witte DR, Jørgensen T, Linneberg A, Lauritzen T, Sandbaek A, Hansen T, Pedersen O, Elliott KS, Kemp JP, St Pourcain B, McMahon G, Zelenika D, Hager J, Lathrop M, Timpon NJ, Smith GD, Sørensen TI. Genome-wide population-based association study of extremely overweight young adults—the GOYA study. <i>PLoS One</i> . 6; 9:e24303 (2011)                                                                                                                                                                                                                                                                           |
| GOOD                                   | Gothenburg Osteoporosis and Obesity Determinants Study              | Population-based                                                   | European descent               | 1,056 | ≥ 97.5% | 1) heterozygosity >33%<br>2) ethnic outliers<br>3) related individuals and duplicates                                                                           | 940   | DEXA                 | GE Lunar Prodigy                                                                 | [PMID: 16007330]<br>Lorentzon, M. et al Free testosterone is a positive whereas free estradiol is a negative predictor of cortical bone size in young Swedish men-The GOOD Study. <i>J Bone Miner Res</i> 20, 1334-1341 (2005).                                                                                                                                                                                                                                                                                                                                                                                                                                                                                                     |
| H2000 CASES                            | Health 2000 cases                                                   | Case-control                                                       | European descent               | 1,022 | ≥ 95%   | 1) heterozygosity, gender check and relatedness checks have been performed and any discrepancies have been removed;<br>2) Missing phenotype.                    | 934   | Bioimpedance         | InBody 3.0                                                                       | <a href="http://www.terveys2000.fi/indexe.html">http://www.terveys2000.fi/indexe.html</a><br>HEALTH AND FUNCTIONAL CAPACITY IN FINLAND, Baseline Results of the Health 2000 Health Examination Survey. In: Aromaa A, Koskinen S, eds. Vol KTL B12/2004. Helsinki: National Public Health Institute; 2004. Available in <a href="http://www.terveys2000.fi/julkaisut/baseline.pdf">http://www.terveys2000.fi/julkaisut/baseline.pdf</a> .<br>[PMID:20673644]<br>Pajunen P, Rissanen H, Härkönen T, Jula A, Reunanen A, Salomaa V. The metabolic syndrome as a predictor of incident diabetes and cardiovascular events in the Health 2000 Study. <i>Diabetes Metab.</i> 2010;36:395-401.                                             |
| H2000 CTRLS                            | Health 2000 controls                                                | Case-control                                                       | European descent               | 1,081 | ≥ 95%   | 1) heterozygosity, gender check and relatedness checks have been performed and any discrepancies have been removed.<br>2) Missing phenotype.                    | 974   | Bioimpedance         | InBody 3.0                                                                       | <a href="http://www.terveys2000.fi/indexe.html">http://www.terveys2000.fi/indexe.html</a><br>HEALTH AND FUNCTIONAL CAPACITY IN FINLAND, Baseline Results of the Health 2000 Health Examination Survey. In: Aromaa A, Koskinen S, eds. Vol KTL B12/2004. Helsinki: National Public Health Institute; 2004. Available in <a href="http://www.terveys2000.fi/julkaisut/baseline.pdf">http://www.terveys2000.fi/julkaisut/baseline.pdf</a> .<br>[PMID:20673644]<br>Pajunen P, Rissanen H, Härkönen T, Jula A, Reunanen A, Salomaa V. The metabolic syndrome as a predictor of incident diabetes and cardiovascular events in the Health 2000 Study. <i>Diabetes Metab.</i> 2010;36:395-401.                                             |
| Health ABC                             | Health, Aging, and Body Composition Study                           | Longitudinal cohort study                                          | European descent               | 1,655 | ≥ 97%   | 1) related individuals and duplicates;<br>2) Missing body weight, height, or DEXA.                                                                              | 1,509 | DEXA                 | Hologic QDR-4500                                                                 | [PMID: 10865790]<br>Harris, T.B. et al. Waist circumference and sagittal diameter reflect total body fat better than visceral fat in older men and women. <i>The Health, Aging and Body Composition Study.</i> <i>Ann N Y Acad Sci.</i> 2000;904:462-73.                                                                                                                                                                                                                                                                                                                                                                                                                                                                            |
| HBCS                                   | Helsinki Birth Cohort Study                                         | Birth-cohort                                                       | European descent               | 1,872 | ≥ 95%   | 1) heterozygosity, gender check and relatedness checks have been performed and any discrepancies have been removed;<br>2) Missing phenotype.                    | 1,556 | Bioimpedance         | InBody 3.0 eight-polar tactile electrode system, Biospace Co., Ltd, Seoul, Korea | [PMID: 17356523]<br>Ylihärsilä H, Kajantie E, Osmond C, Forsén T, Barker DJ, Eriksson JG. Birth size, adult body composition and muscle strength in later life. <i>Int J Obes (Lond).</i> 2007 Sep;31(9):1392-9.<br>[PMID:7674877]<br>Bouchard C, Leon AS, Rao DC, Skinner JS, Wilmore JH and Gagnon J. The HERITAGE Family Study: Aims, design, and measurement protocol. <i>Medicine and Science in Sports and Exercise</i> 27:721-729, 1995<br>[PMID:21183627]<br>Bouchard C, Sarzynski MA, Rice T, Kraus W, Church T, Sung YJ, Rao DC, Rankinen T. Genomic predictors of maximal oxygen uptake response to standardized exercise training programs. <i>Journal of Applied Physiology</i> 110:1160-1170, 2011<br>[PMID:17216685] |
| HERITAGE Family Study                  | Health, Risk Factors, Training and Genetics (HERITAGE) Family Study | Family Study, baseline data from an exercise training intervention | European descent               | 500   | >99%    | 1) gender mismatch<br>2) Mendelian check<br>3) Missing trait                                                                                                    | 500   | Under water weighing | Residual lung volume: SensorMedics 2900 MMC                                      | Joanne M Jordan, Charles G Helmick, Jordan B Renner, George Luta, Anca D Dragomir, Janice Woodard, Fang Fang, Todd A Schwartz, Lauren M Abbate, Leigh F Callahan, William D Kalsbeek and Marc C Hochberg (2007) Prevalence of knee symptoms and radiographic and symptomatic knee osteoarthritis in African Americans and Caucasians: the Johnston County Osteoarthritis Project. <i>J Rheumatol</i> ;34:172-180<br>[PMID: 19396169]                                                                                                                                                                                                                                                                                                |
| Johnston County Osteoarthritis Project | Johnston County Osteoarthritis Project                              | Population-based                                                   | European and African Americans | 2,583 | ≥ 98%   | 1) sex/gender mismatch<br>2) first-degree relative<br>3) disagreement between reported and genotypic race<br>4) missing height and/or weight or other covariate | 1,412 | DEXA                 | Hologic                                                                          | YS Cho et al. A large-scale genome-wide association study of Asian populations uncovers genetic factors influencing eight quantitative traits. <i>Nature Genetics</i> 41, 527 - 534 (2009)<br>[PMID: 20031538]<br>Heid IM, et al. Genome-wide association analysis of highdensity lipoprotein cholesterol in the population-basedKORA study sheds new light on intergenic regions. <i>Circ Cardiovasc Genet</i> 1, 10-20 (2008).<br>[PMID: 16032514]<br>Wichmann HE, et al. KORA-gen - resource for population genetics, controls and a broad spectrum of disease phenotypes. <i>Gesundheitswesen</i> , 67 Suppl 1, S26-30 (2005).<br>[PMID: 21909110]                                                                              |
| KoGES                                  | Korean Genome Epidemiology Study                                    | Population-based                                                   | Korean                         | 2,333 | ≥ 99%   | 1) gender mismatch with typed X-linked markers                                                                                                                  | 2,333 | DEXA                 | GE Lunar Prodigy                                                                 | Wain LV,Verwoert GC, O'Reilly PF, et al. Genome-wide association study identifies six new loci influencing pulse pressure and mean arterial pressure. <i>Nat Genet</i> 2001, 43:1005-1011, 2.<br>[PMID:21909115]<br>International Consortium for Blood Pressure Genome-Wide Association Studies, et al. Genetic Variants in novel pathways influence blood pressure and cardiovascular disease risk. <i>Nature</i> 2011, 478:103-109.<br>[PMID: 19820698]<br>Chambers JC, Zhang W, Li Y, et al. Genome-wide association study identifies variants in TM6RS56 associated with hemoglobin levels. <i>Nat Genet</i> 2009, 41:1170-1172.<br>[PMID: 19651812]                                                                            |
| KORA F3                                | Cooperative Health Research in the Augsburg Region                  | Population-based                                                   | European descent               | NA    | ≥ 93%   | 1) gender mismatch<br>2) missing body fat percentage data                                                                                                       | 1,560 | Bioimpedance         | DATA-INPUT GmbH BIA 2000-S                                                       | Chambers JC, Zhang W, Zabaneh D, et al. Common genetic variation near melatonin receptor MTNR1B contributes to raised plasma glucose and increased risk of type 2 diabetes among Indian Asians and European Caucasians. <i>Diabetes</i> 2009, 58:2703-2708.<br>[PMID: 18454146]                                                                                                                                                                                                                                                                                                                                                                                                                                                     |
| KORA S4/F4                             | Cooperative Health Research in the Augsburg Region                  | Population-based                                                   | European descent               | NA    | ≥ 93%   | 1) gender mismatch<br>2) missing body fat percentage data                                                                                                       | 1,794 | Bioimpedance         | DATA-INPUT GmbH BIA 2000-S                                                       | Chambers JC, Elliott P, Zabaneh D, et al. Common Genetic variation near MC4R is associated with waist circumference and insulin resistance. <i>Nat Genet</i> 2008, 40: 716-718.<br>[PMID: 18193046]<br>Kooner JS, Chambers JC, Aguilar-Salinas CA, et al. Genome-wide scan identifies variation in MLXIPL associated with plasma triglycerides. <i>Nat Genet</i> 2008, 40:149-151.                                                                                                                                                                                                                                                                                                                                                  |
| LOLIPOP_EW610                          | London Life Sciences Prospective Population Study                   | Population-based                                                   | European descent               | 945   | ≥ 95%   | Duplicates, gender discrepancy, contaminated samples, relatedness                                                                                               | 927   | Bioimpedance         | Tanita TBF-401                                                                   |                                                                                                                                                                                                                                                                                                                                                                                                                                                                                                                                                                                                                                                                                                                                     |
| LOLIPOP_IA610                          | London Life Sciences Prospective Population Study                   | CHD case-control study                                             | Indian Asian                   | 7,032 | ≥ 95%   | Duplicates, gender discrepancy, ethnic outliers, contaminated samples, relatedness                                                                              | 6,549 | Bioimpedance         | Tanita TBF-401                                                                   |                                                                                                                                                                                                                                                                                                                                                                                                                                                                                                                                                                                                                                                                                                                                     |
| LOLIPOP_IA317                          | London Life Sciences Prospective Population Study                   | Population-based with some enrichment                              | Indian Asian                   | 2,694 | ≥ 95%   | Duplicates, gender discrepancy, ethnic outliers, contaminated samples, relatedness, samples already in IA610                                                    | 2,120 | Bioimpedance         | Tanita TBF-401                                                                   |                                                                                                                                                                                                                                                                                                                                                                                                                                                                                                                                                                                                                                                                                                                                     |
| LOLIPOP_IA_P                           | London Life Sciences Prospective Population Study                   | Population-based with some enrichment                              | Indian Asian                   | 1,005 | ≥ 95%   | Duplicates, contaminated samples, samples already in IA610                                                                                                      | 612   | Bioimpedance         | Tanita TBF-401                                                                   |                                                                                                                                                                                                                                                                                                                                                                                                                                                                                                                                                                                                                                                                                                                                     |

|                           |                                                                            |                           |                  |       |         |                                                                                                                                                                                                                                                                                                             |       |                     |                                                                    |                                                                                                                                                                                                                                                                                                                                         |
|---------------------------|----------------------------------------------------------------------------|---------------------------|------------------|-------|---------|-------------------------------------------------------------------------------------------------------------------------------------------------------------------------------------------------------------------------------------------------------------------------------------------------------------|-------|---------------------|--------------------------------------------------------------------|-----------------------------------------------------------------------------------------------------------------------------------------------------------------------------------------------------------------------------------------------------------------------------------------------------------------------------------------|
| MAP                       | Rush Memory and Aging Project                                              | Longitudinal Cohort Study | European descent | 891   | 95%     | 1) genotype-derived gender discordant with reported gender;<br>2) inbreeding coefficient $F > 0.04$ ;<br>3) missing phenotypes                                                                                                                                                                              | 627   | BIA                 | Portable Body Comp Scale by American Weights & Measure, California | [PMID: 22471867]<br>Bennett DA, Schneider JA, Buchman AS, Barnes LL, Boyle PA, Wilson RS. Overview and findings from the rush memory and aging project. <i>Curr Alzheimer Res.</i> 2012;9:646-63.                                                                                                                                       |
| MrOS                      | Osteoporotic Fractures in Men Study                                        | Population-based          | European descent | 5,994 | ≥97%    | 1) genotypic sex mismatch,<br>2) relatedness by estimated IBD,<br>3) gross chromosomal abnormalities by BAF in > 5 chromosomes,<br>4) non-European ethnic outliers from PCA                                                                                                                                 | 4,550 | DEXA                | Hologic QDR 4500                                                   | [PMID: 16084776] Orwoll, E., et al. Design and baseline characteristics of the osteoporotic fractures in men (MrOS) study -- a large observational study of the determinants of fracture in older men. <i>Contemp Clin Trials.</i> 2005;26:569-85.                                                                                      |
| ORCADES                   | Orkney Complex Disease Study                                               | Population-based          | European descent | 875   | 97%     | ethnic outliers, people with missing phenotype data                                                                                                                                                                                                                                                         | 860   | Bioimpedance        | Tanita bodyfat scales                                              | [PMID: 18760389]<br>McQuillan R, et al. Runs of homozygosity in European populations. <i>Am J Hum Genet.</i> 2008;83:359-72                                                                                                                                                                                                             |
| PIVUS                     | The Prospective Investigation of the Vasculature in Uppsala Seniors        | Population-based          | European descent | 1,016 | ≥ 95%   | 1) heterozygosity >3 SD;<br>2) gender discordance;<br>3) ethnic outliers;<br>4) related individuals and duplicates;<br>5) missing phenotype data.                                                                                                                                                           | 826   | DXA                 | GE Lunar Prodigy                                                   | [PMID: 16141402]<br>Lind, L, et al. A comparison of three different methods to evaluate endothelium-dependent vasodilation in the elderly: the Prospective Investigation of the Vasculature in Uppsala Seniors (PIVUS) study. <i>Arterioscler Thromb Vasc Biol</i> 25, 2368-75 (2005).                                                  |
| PREVEND                   | Prevention of renal and vascular end-stage disease                         | Population-based          | European descent | 3,649 | ≥ 95%   | 1) related individuals<br>2) sample outliers based on 16,842 independent SNPs. Samples were excluded when Z-score > 3 on the first 5 PCA's .<br>3) sex inconsistencies                                                                                                                                      | 3,622 | Bioimpedance        |                                                                    | [PMID: 12356629]<br>Hillege HL, et al. Urinary albumin excretion predicts cardiovascular and noncardiovascular mortality in general population. <i>Circulation.</i> 2002;106:1777-82.                                                                                                                                                   |
| QFS                       | Quebec Family Study                                                        | Population-based          | European descent | 951   | ≥ 95%   | NA                                                                                                                                                                                                                                                                                                          | 860   | Underwater weighing |                                                                    | [PMID: 3391737]<br>Bouchard et al., Inheritance of the amount and distribution of human body fat. <i>International Journal of Obesity</i> 12, 205-215 (1988).                                                                                                                                                                           |
| RISC                      | Relationship between Insulin Sensitivity and Cardiovascular disease Study  | Population-based          | European descent | 1,566 | >95%    | 1) Non-European descent<br>2) Sex mismatches                                                                                                                                                                                                                                                                | 1,247 | Bioimpedance        | Tanita TBF-300 Body Composition Analyser                           | [PMID:14968294]<br>Hills, S.A. et al. The EGIR-RISC STUDY (The European group for the study of insulin resistance: relationship between insulin sensitivity and cardiovascular disease risk): I. Methodology and objectives. <i>Diabetologia</i> , 47, 556-570 (2004)                                                                   |
| RS I                      | Rotterdam Study I                                                          | Population-based          | European descent | 7,983 | ≥ 97.5% | 1) missing DNA;<br>2) gender mismatch with typed X-linked markers;<br>3) excess autosomal heterozygosity >0.336~ FDR>0.1%;<br>4) duplicates and/or 1st or 2nd degree relatives using IBS probabilities >97% from PLINK;<br>5) ethnic outliers using IBS distances >3SD from PLINK;<br>6) missing phenotype. | 2,438 | DEXA                | Lunar Prodigy, GE Healthcare                                       | [PMID: 24258680]<br>Hofman A et al. The Rotterdam Study. 2014 objectives and design update. <i>Eur J Epidemiol.</i> 2013 Nov;28(11):889-926                                                                                                                                                                                             |
| RS III                    | Rotterdam Study III                                                        | Population-based          | European descent | 3,932 | ≥ 97.5% | 1) gender mismatch with typed X-linked markers;<br>2) excess autosomal heterozygosity ( $F < 0.055$ );<br>3) duplicates and/or 1st degree relatives using IBD PIHAT >40% from PLINK;<br>4) ethnic outliers IBS distances > 4SD mean HaMAP CEU cluster from PLINK;<br>5) Missing body weight and height.     | 1,594 | DXA                 | GE-Lunar Prodigy                                                   | [PMID: 24258680]<br>Hofman A et al. The Rotterdam Study. 2014 objectives and design update. <i>Eur J Epidemiol.</i> 2013 Nov;28(11):889-926                                                                                                                                                                                             |
| SHIP                      | Study of Health in Pomerania (follow-up 2)                                 | Population-based          | European descent | 4,310 | ≥ 92%   | 1) duplicate samples (by estimated IBD)<br>2) reported/genotyped gender mismatch                                                                                                                                                                                                                            | 2,013 | Bioimpedance        | Data Input Nutriguard M                                            | [PMID: 20167617]<br>Völzke H, et al. Cohort profile: the study of health in Pomerania. <i>Int J Epidemiol.</i> 2011;40:294-307.                                                                                                                                                                                                         |
| SHIP-TREND                | Study of Health in Pomerania - TREND                                       | Population-based          | European descent | 997   | ≥ 94%   | 1) duplicate samples (by estimated IBD)<br>2) reported/genotyped gender mismatch                                                                                                                                                                                                                            | 961   | Bioimpedance        | Data Input Nutriguard M                                            | [PMID: 20167617]<br>Völzke H, et al. Cohort profile: the study of health in Pomerania. <i>Int J Epidemiol.</i> 2011;40:294-307.                                                                                                                                                                                                         |
| SOF                       | Study of Osteoporotic Fractures                                            | Population-based          | European descent | 9,704 | ≥97%    | 1) genotypic sex mismatch,<br>2) relatedness by estimated IBD,<br>3) gross chromosomal abnormalities by BAF in > 5 chromosomes,<br>4) non-European ethnic outliers from PCA                                                                                                                                 | 3,422 | DEXA                | Hologic QDR 1000                                                   | [PMID: 1414480]<br>Steiger P, Cummings SR, Black DM, Spencer NE, Genant HK. Age-related decrements in bone mineral density in women over 65. <i>Journal of bone and mineral research : the official journal of the American Society for Bone and Mineral Research.</i> 1992;7:625-632.                                                  |
| SORBS                     | Sorbs are self-contained population from Eastern Germany, European Descent | Population-based          | European descent | 1,097 | ≥ 94%   | 1) gender mismatch;<br>2) ethnic outliers;<br>3) duplicates;<br>4) missing body weight and height.<br>1) heterozygosity ≥2 s.d. from the sample mean;                                                                                                                                                       | 876   | BIA                 | BIA-2000-S (Data Input GmbH, Darmstadt, Germany)                   | Tönjes A et al. Association of FTO variants with BMI and fat mass in the self-contained population of Sorbs in Germany. <i>Eur J Hum Genet.</i> 2010;18:104-10                                                                                                                                                                          |
| TwinsUK                   | TwinsUK                                                                    | Twins Study               | European descent | 5,654 | ≥ 98%   | 2) ethnic outliers;<br>3) related individuals and duplicates;<br>4) missing body weight and height.                                                                                                                                                                                                         | 2,204 | DEXA                | Hologic Discovery W' - QDR software version 12.6                   | [PMID: 22253318]<br>Moayyeri, A. et al. Cohort Profile: TwinsUK and healthy ageing twin study. <i>Int J Epidemiol.</i> 42, 76-85 (2013)                                                                                                                                                                                                 |
| ULSAM                     | The Uppsala Longitudinal Study of Adult Men                                | Population-based          | European descent | 1,221 | ≥ 95%   | 1) heterozygosity >3 SD;<br>2) gender discordance;<br>3) ethnic outliers;<br>4) related individuals and duplicates;<br>5) missing phenotype data.                                                                                                                                                           | 483   | DEXA                | GE Lunar Prodigy                                                   | [PMID: 16030278]<br>Ingelsson, E. et al. Insulin resistance and risk of congestive heart failure. <i>JAMA</i> 20, 334-41 (2005).                                                                                                                                                                                                        |
| YFS                       | The Cardiovascular Risk in Young Finns Study                               | Population-based          | European descent | 2,556 | ≥ 95%   | 1) heterozygosity, gender check and relatedness checks have been performed and any discrepancies have been removed.<br>2) missing phenotype.                                                                                                                                                                | 337   | Bioimpedance        | InBody 3.0                                                         | [PMID:18263651]<br>Raitakari OT, Juonala M, Rönnemaa T, Keltikangas-Järvinen L, Räsänen L, Pietikäinen M, Hutri-Kähönen N, Taittonen L, Jokinen E, Marniemi J, Jula A, Telama R, Kähönen M, Lehtimäki T, Akerblom HK, Viikari JS. Cohort profile: the cardiovascular risk in Young Finns Study. <i>Int J Epidemiol.</i> 2008;37:1220-6. |
| <b>Metabochip studies</b> |                                                                            |                           |                  |       |         |                                                                                                                                                                                                                                                                                                             |       |                     |                                                                    |                                                                                                                                                                                                                                                                                                                                         |
| DESIR                     | Data from an Epidemiological Study on the Insulin Resistance syndrome      | Population-based          | European descent | 4,993 | ≥ 90%   | 1) Missing data                                                                                                                                                                                                                                                                                             | 3,925 | Bioimpedance        | TBF 300P balance from Tanita (Neully-sur-Seine, France)            | [PMID: 8927780]<br>Balkau B (1996) An epidemiologic survey from a network of French Health Examination Centres. (D.E.S.I.R.): epidemiologic data on the insulin resistance syndrome. <i>Rev Epidemiol Sante Publique</i> 44(4):373-5.                                                                                                   |

|                  |                                                                                                                                               |                                                                                    |                  |                                    |          |                                                                                                       |                           |              |                                                                |                                                                                                                                                                                                                                                                                                                                                                                                                                                                                                                                                                                                                                                                                                                                                                                                                                                                                                                                                                                                                                                                                                                                                                                                                                                                                                                                                                                                                                                                                                                                                                                                                                                                                                                                                                                                                                                                                                                                                                                                                                                                                                                                                                                                               |
|------------------|-----------------------------------------------------------------------------------------------------------------------------------------------|------------------------------------------------------------------------------------|------------------|------------------------------------|----------|-------------------------------------------------------------------------------------------------------|---------------------------|--------------|----------------------------------------------------------------|---------------------------------------------------------------------------------------------------------------------------------------------------------------------------------------------------------------------------------------------------------------------------------------------------------------------------------------------------------------------------------------------------------------------------------------------------------------------------------------------------------------------------------------------------------------------------------------------------------------------------------------------------------------------------------------------------------------------------------------------------------------------------------------------------------------------------------------------------------------------------------------------------------------------------------------------------------------------------------------------------------------------------------------------------------------------------------------------------------------------------------------------------------------------------------------------------------------------------------------------------------------------------------------------------------------------------------------------------------------------------------------------------------------------------------------------------------------------------------------------------------------------------------------------------------------------------------------------------------------------------------------------------------------------------------------------------------------------------------------------------------------------------------------------------------------------------------------------------------------------------------------------------------------------------------------------------------------------------------------------------------------------------------------------------------------------------------------------------------------------------------------------------------------------------------------------------------------|
| DILGOM           | Dietary, life style, and genetic determinants of obesity and metabolic syndrome                                                               | Population-based                                                                   | European descent | 3,997                              | ≥ 95%    | 1) heterozygosity <23.9% or >27.6%;<br>2) ethnic outliers;<br>3) related individuals and duplicates.  | 3,835                     | Bioimpedance | TANITA TBF-300MA                                               | [PMID: 20138944]<br>Kontinen H, Männistö S, Sarlio-Lähteenkorva S, Silventoinen K, Haukkala A. Emotional eating, depressive symptoms and self-reported food consumption. A population-based study. <i>Appetite</i> . 2010;54:473-9.<br>[PMID: 20944574]<br>Inouye M, Silander K, Hamalainen E, Salomaa V, Harald K, Jousilahti P, Männistö S, Eriksson JG, Saarela J, Ripatti S, Perola M, van Ommen GJ, Taskinen MR, Palotie A, Dermizakis ET, Peltonen L. An immune response network associated with blood lipid levels. <i>PLoS Genet</i> . 2010;6(9).<br>Peltonen M, Harald K, Männistö S, Saarikoski L, Peltomäki P, Lund L, et al. (2008). The National FINRISK 2007 Study. Helsinki: Publications of the National Public Health Institute. B 34/2008.<br>[PMID: 17257254]<br>Forouhi NG. et al. Incidence of Type 2 diabetes in England and its association with baseline impaired fasting glucose: the Ely study 1990-2000. <i>Diabet Med</i> . 2007;24:200-7.<br>[PMID: 10466767]<br>Day NE, et al. EPIC-Norfolk: study design and characteristics of the cohort. <i>European Prospective Investigation of Cancer. British Journal of Cancer</i> 80, 95-103 (1999).<br>[PMID: 18454148]<br>Loos R, J. et al. Common variants near MC4R are associated with fat mass, weight and risk of obesity. <i>Nat Genet</i> 40, 768-775 (2008).<br>[PMID: 20519590]<br>Roffe Ede L, Loos RP, Druet C, Stolk RP, Ekelund U, Griffin SJ, Forouhi NG, Wareham NJ, Ong KK. Association between birth weight and visceral fat in adults. <i>Am J Clin Nutr</i> 2010;92:347-52.<br>[PMID: 23615486]<br>Thuesen BH, Cerqueira C, Aadahl M, Ebstrup JF, Toft U, Thyssen JP, Fenger RV, Hersoug LG, Eiberling J, Pedersen O, Hansen T, Johansen JD, Jørgensen T, Linneberg A. Cohort Profile: The Health2006 cohort, Research Centre for Prevention and Health. <i>Int J Epidemiol</i> . 2014;43:568-75.<br>[PMID: 25532602]<br>Fenger RV, Gonzalez-Quintela A, Vidal C, Husemoen LL, Skaaby T, Thuesen BH, Aadahl M, Madsen F, Linneberg A. The longitudinal relationship of changes of adiposity to changes in pulmonary function and risk of asthma in a general adult population. <i>BMC Pulm Med</i> . 2014;14:208 |
| Ely Study        | MRC Ely Study                                                                                                                                 | Population-based                                                                   | European descent | 1,625                              | ≥ 95%    | 1) missing phenotype data<br>2) gender check;<br>3) duplicates check;                                 | 1,582                     | Bioimpedance | BODY STAT 1500                                                 | [PMID: 9103091]<br>Cooper R, Rotimi C, Ataman S, McGee D, Osotimehin B, Kadir S, Muna W, Kingue S, Fraser H, Forrester T, Bennett F, Wilks R. The prevalence of hypertension in seven populations of west African origin. <i>Am J Public Health</i> . 1997;87:160-8.<br>[PMID: 9098179]<br>Luke A, Durazo-Arvizu R, Rotimi C, Prewitt TE, Forrester T, Wilks R, Ogunbiyi OJ, Schoeller DA, McGee D, Cooper RS. Relation between body mass index and body fat in black population samples from Nigeria, Jamaica, and the United States. <i>Am J Epidemiol</i> . 1997;145:620-8.<br>[PMID: 20400458]<br>Kang SJ, Chiang CW, Palmer CD, Tayo BO, Lettre G, Butler JL, Hackett R, Adeyemo AA, Guiducci C, Berzins I, Nguyen TT, Feng T, Luke A, Shriner D, Ardlie K, Rotimi C, Wilks R, Forrester T, McKenzie CA, Lyon HN, Cooper RS, Zhu X, Hirschhorn JN. Genome-wide association of anthropometric traits in African- and African-derived populations. <i>Hum Mol Genet</i> . 2010;19:2725-38.                                                                                                                                                                                                                                                                                                                                                                                                                                                                                                                                                                                                                                                                                                                                                                                                                                                                                                                                                                                                                                                                                                                                                                                                                 |
| EPIC-Norfolk T2D | EPIC (European Prospective Investigation into Cancer) Norfolk T2D case-Cohort Study                                                           | Population-based                                                                   | European descent | 963 - cohort; 727 - T2D            | ≥ 95%    | 1) missing body weight and height, or case-control status.<br>2) heterozygosity<br>3) gender check    | 583 - cohort; 402 - T2D   | Bioimpedance | Tanita TBF300                                                  | [PMID: 9103091]<br>Cooper R, Rotimi C, Ataman S, McGee D, Osotimehin B, Kadir S, Muna W, Kingue S, Fraser H, Forrester T, Bennett F, Wilks R. The prevalence of hypertension in seven populations of west African origin. <i>Am J Public Health</i> . 1997;87:160-8.<br>[PMID: 9098179]<br>Luke A, Durazo-Arvizu R, Rotimi C, Prewitt TE, Forrester T, Wilks R, Ogunbiyi OJ, Schoeller DA, McGee D, Cooper RS. Relation between body mass index and body fat in black population samples from Nigeria, Jamaica, and the United States. <i>Am J Epidemiol</i> . 1997;145:620-8.<br>[PMID: 20400458]<br>Kang SJ, Chiang CW, Palmer CD, Tayo BO, Lettre G, Butler JL, Hackett R, Adeyemo AA, Guiducci C, Berzins I, Nguyen TT, Feng T, Luke A, Shriner D, Ardlie K, Rotimi C, Wilks R, Forrester T, McKenzie CA, Lyon HN, Cooper RS, Zhu X, Hirschhorn JN. Genome-wide association of anthropometric traits in African- and African-derived populations. <i>Hum Mol Genet</i> . 2010;19:2725-38.                                                                                                                                                                                                                                                                                                                                                                                                                                                                                                                                                                                                                                                                                                                                                                                                                                                                                                                                                                                                                                                                                                                                                                                                                 |
| Fenland          | The Fenland Study                                                                                                                             | Population-based                                                                   | European descent | 3,217                              | ≥ 95%    | 1) missing phenotype data<br>2) gender check;<br>3) duplicates check;                                 | 3,132                     | DEXA         | GE Lunar Prodigy Advance                                       | [PMID: 9103091]<br>Cooper R, Rotimi C, Ataman S, McGee D, Osotimehin B, Kadir S, Muna W, Kingue S, Fraser H, Forrester T, Bennett F, Wilks R. The prevalence of hypertension in seven populations of west African origin. <i>Am J Public Health</i> . 1997;87:160-8.<br>[PMID: 9098179]<br>Luke A, Durazo-Arvizu R, Rotimi C, Prewitt TE, Forrester T, Wilks R, Ogunbiyi OJ, Schoeller DA, McGee D, Cooper RS. Relation between body mass index and body fat in black population samples from Nigeria, Jamaica, and the United States. <i>Am J Epidemiol</i> . 1997;145:620-8.<br>[PMID: 20400458]<br>Kang SJ, Chiang CW, Palmer CD, Tayo BO, Lettre G, Butler JL, Hackett R, Adeyemo AA, Guiducci C, Berzins I, Nguyen TT, Feng T, Luke A, Shriner D, Ardlie K, Rotimi C, Wilks R, Forrester T, McKenzie CA, Lyon HN, Cooper RS, Zhu X, Hirschhorn JN. Genome-wide association of anthropometric traits in African- and African-derived populations. <i>Hum Mol Genet</i> . 2010;19:2725-38.                                                                                                                                                                                                                                                                                                                                                                                                                                                                                                                                                                                                                                                                                                                                                                                                                                                                                                                                                                                                                                                                                                                                                                                                                 |
| HEALTH2006       | HEALTH2006                                                                                                                                    | Population-based                                                                   | white European   | 2,374                              | ≥ 95%    | 1) Missing body weight and height.<br>2) Heterozygosity<br>3) Gender check<br>4) Duplicates check     | 2,277                     | Bioimpedance | foot-to-foot Tanita Body Composition                           | [PMID: 9103091]<br>Cooper R, Rotimi C, Ataman S, McGee D, Osotimehin B, Kadir S, Muna W, Kingue S, Fraser H, Forrester T, Bennett F, Wilks R. The prevalence of hypertension in seven populations of west African origin. <i>Am J Public Health</i> . 1997;87:160-8.<br>[PMID: 9098179]<br>Luke A, Durazo-Arvizu R, Rotimi C, Prewitt TE, Forrester T, Wilks R, Ogunbiyi OJ, Schoeller DA, McGee D, Cooper RS. Relation between body mass index and body fat in black population samples from Nigeria, Jamaica, and the United States. <i>Am J Epidemiol</i> . 1997;145:620-8.<br>[PMID: 20400458]<br>Kang SJ, Chiang CW, Palmer CD, Tayo BO, Lettre G, Butler JL, Hackett R, Adeyemo AA, Guiducci C, Berzins I, Nguyen TT, Feng T, Luke A, Shriner D, Ardlie K, Rotimi C, Wilks R, Forrester T, McKenzie CA, Lyon HN, Cooper RS, Zhu X, Hirschhorn JN. Genome-wide association of anthropometric traits in African- and African-derived populations. <i>Hum Mol Genet</i> . 2010;19:2725-38.                                                                                                                                                                                                                                                                                                                                                                                                                                                                                                                                                                                                                                                                                                                                                                                                                                                                                                                                                                                                                                                                                                                                                                                                                 |
| GXE              | Gene By Environment                                                                                                                           | Population-based                                                                   | Jamaican         | 1,039                              | ≥ 95%    | 1) Missing phenotype data;<br>2) heterozygosity;<br>3) PCA outliers;<br>4) IBD cryptic relateds       | 613                       | Bioimpedance | BIA 101Q (R.J.L Systems)                                       | [PMID: 9103091]<br>Cooper R, Rotimi C, Ataman S, McGee D, Osotimehin B, Kadir S, Muna W, Kingue S, Fraser H, Forrester T, Bennett F, Wilks R. The prevalence of hypertension in seven populations of west African origin. <i>Am J Public Health</i> . 1997;87:160-8.<br>[PMID: 9098179]<br>Luke A, Durazo-Arvizu R, Rotimi C, Prewitt TE, Forrester T, Wilks R, Ogunbiyi OJ, Schoeller DA, McGee D, Cooper RS. Relation between body mass index and body fat in black population samples from Nigeria, Jamaica, and the United States. <i>Am J Epidemiol</i> . 1997;145:620-8.<br>[PMID: 20400458]<br>Kang SJ, Chiang CW, Palmer CD, Tayo BO, Lettre G, Butler JL, Hackett R, Adeyemo AA, Guiducci C, Berzins I, Nguyen TT, Feng T, Luke A, Shriner D, Ardlie K, Rotimi C, Wilks R, Forrester T, McKenzie CA, Lyon HN, Cooper RS, Zhu X, Hirschhorn JN. Genome-wide association of anthropometric traits in African- and African-derived populations. <i>Hum Mol Genet</i> . 2010;19:2725-38.                                                                                                                                                                                                                                                                                                                                                                                                                                                                                                                                                                                                                                                                                                                                                                                                                                                                                                                                                                                                                                                                                                                                                                                                                 |
| SPT              | Spanish Town                                                                                                                                  | Population-based                                                                   | Jamaican         | 1,831                              | ≥ 95%    | 1) Missing phenotype data;<br>2) heterozygosity;<br>3) PCA outliers;<br>4) IBD cryptic relateds       | 476                       | Bioimpedance | BIA 101Q (R.J.L Systems)                                       | [PMID: 9103091]<br>Cooper R, Rotimi C, Ataman S, McGee D, Osotimehin B, Kadir S, Muna W, Kingue S, Fraser H, Forrester T, Bennett F, Wilks R. The prevalence of hypertension in seven populations of west African origin. <i>Am J Public Health</i> . 1997;87:160-8.<br>[PMID: 9098179]<br>Luke A, Durazo-Arvizu R, Rotimi C, Prewitt TE, Forrester T, Wilks R, Ogunbiyi OJ, Schoeller DA, McGee D, Cooper RS. Relation between body mass index and body fat in black population samples from Nigeria, Jamaica, and the United States. <i>Am J Epidemiol</i> . 1997;145:620-8.<br>[PMID: 20400458]<br>Kang SJ, Chiang CW, Palmer CD, Tayo BO, Lettre G, Butler JL, Hackett R, Adeyemo AA, Guiducci C, Berzins I, Nguyen TT, Feng T, Luke A, Shriner D, Ardlie K, Rotimi C, Wilks R, Forrester T, McKenzie CA, Lyon HN, Cooper RS, Zhu X, Hirschhorn JN. Genome-wide association of anthropometric traits in African- and African-derived populations. <i>Hum Mol Genet</i> . 2010;19:2725-38.                                                                                                                                                                                                                                                                                                                                                                                                                                                                                                                                                                                                                                                                                                                                                                                                                                                                                                                                                                                                                                                                                                                                                                                                                 |
| KORA F3          | Cooperative Health Research in the Region of Augsburg (third survey), KOoperative Gesundheitsforschung in der Region Augsburg (dritte Studie) | Population-based                                                                   | European descent | 1,482 (not included in GWAS stage) | none     | none                                                                                                  | 1,381                     | Bioimpedance | DATA-INPUT GmbH BIA 2000-S                                     | Wichmann H.E. et al. KORA-gen—resource for population genetics, controls and a broad spectrum of disease phenotypes. <i>Gesundheitswesen</i> (2005) 67 Suppl 1, S26-30.                                                                                                                                                                                                                                                                                                                                                                                                                                                                                                                                                                                                                                                                                                                                                                                                                                                                                                                                                                                                                                                                                                                                                                                                                                                                                                                                                                                                                                                                                                                                                                                                                                                                                                                                                                                                                                                                                                                                                                                                                                       |
| KORA S4/F4       | Cooperative Health Research in the Region of Augsburg (forth survey), KOoperative Gesundheitsforschung in der Region Augsburg (vierte Studie) | Population-based                                                                   | European descent | 1,222 (not included in GWAS stage) | none     | none                                                                                                  | 1,191                     | Bioimpedance | DATA-INPUT GmbH BIA 2000-S                                     | Wichmann H.E. et al. KORA-gen—resource for population genetics, controls and a broad spectrum of disease phenotypes. <i>Gesundheitswesen</i> (2005) 67 Suppl 1, S26-30.                                                                                                                                                                                                                                                                                                                                                                                                                                                                                                                                                                                                                                                                                                                                                                                                                                                                                                                                                                                                                                                                                                                                                                                                                                                                                                                                                                                                                                                                                                                                                                                                                                                                                                                                                                                                                                                                                                                                                                                                                                       |
| Leipzig Adults   | Leipzig adults                                                                                                                                | Population-based                                                                   | European descent | 1,005                              | ≥ 95%    | ethnic outliers / gender discordance                                                                  | 1,005                     | Bioimpedance | BIA-Nutriguard-MS with the software Nutri3                     | [PMID: 20935630]<br>Speliotes EK, Willer CJ, Berndt SI, Monda KL, Thorleifsson G, Jackson AU et al. Association analyses of 249,796 individuals reveal 18 new loci associated with body mass index. <i>Nat Genet</i> . 2010;42:937-48.<br>[PMID: 19223598]<br>Stancakova A, Javorsky M, Kuulasmaa T, Haffner SM, Kuusisto J, Laakso M: Changes in insulin sensitivity and insulin release in relation to glycemia and glucose tolerance in 6416 Finnish men. <i>Diabetes</i> 58:1212-1221, 2009.<br>[PMID: 15576467]<br>Marmot M, Brunner E. Cohort Profile: the Whitehall II study. <i>Int J Epidemiol</i> . 2005; 34:251-6.<br>[PMID: 21441441]<br>Jensen AC et al. Associations of common genetic variants with age-related changes in fasting and postload glucose: evidence from 18 years of follow-up of the Whitehall II cohort. <i>Diabetes</i> . 2011; 60:1617-23.                                                                                                                                                                                                                                                                                                                                                                                                                                                                                                                                                                                                                                                                                                                                                                                                                                                                                                                                                                                                                                                                                                                                                                                                                                                                                                                                   |
| METSIM           | Metabolic Syndrome In Men                                                                                                                     | Population-based, although T2D case-control samples selected for metabochip typing | European descent | 2,176                              | ≥ 98.15% | 1) Missing BMI, age, age<18;<br>2) Gender discrepancy or anomaly;<br>3) Unexplained duplicate sample. | 1,204 cases, 957 controls | Bioimpedance | Bioimpedance Analyzer Model BIA101 (Akern Srl, Florence Italy) | [PMID: 20935630]<br>Speliotes EK, Willer CJ, Berndt SI, Monda KL, Thorleifsson G, Jackson AU et al. Association analyses of 249,796 individuals reveal 18 new loci associated with body mass index. <i>Nat Genet</i> . 2010;42:937-48.<br>[PMID: 19223598]<br>Stancakova A, Javorsky M, Kuulasmaa T, Haffner SM, Kuusisto J, Laakso M: Changes in insulin sensitivity and insulin release in relation to glycemia and glucose tolerance in 6416 Finnish men. <i>Diabetes</i> 58:1212-1221, 2009.<br>[PMID: 15576467]<br>Marmot M, Brunner E. Cohort Profile: the Whitehall II study. <i>Int J Epidemiol</i> . 2005; 34:251-6.<br>[PMID: 21441441]<br>Jensen AC et al. Associations of common genetic variants with age-related changes in fasting and postload glucose: evidence from 18 years of follow-up of the Whitehall II cohort. <i>Diabetes</i> . 2011; 60:1617-23.                                                                                                                                                                                                                                                                                                                                                                                                                                                                                                                                                                                                                                                                                                                                                                                                                                                                                                                                                                                                                                                                                                                                                                                                                                                                                                                                   |
| Whitehall        | The Whitehall II study                                                                                                                        | Cohort of London-based civil servants                                              | European descent | 3,413                              | ≥ 95%    | 1) missing phenotype data<br>2) gender check;<br>3) duplicates check;                                 | 2,223                     | Bioimpedance | Tanita TBF-300 Body Composition Analyser                       | [PMID: 20935630]<br>Speliotes EK, Willer CJ, Berndt SI, Monda KL, Thorleifsson G, Jackson AU et al. Association analyses of 249,796 individuals reveal 18 new loci associated with body mass index. <i>Nat Genet</i> . 2010;42:937-48.<br>[PMID: 19223598]<br>Stancakova A, Javorsky M, Kuulasmaa T, Haffner SM, Kuusisto J, Laakso M: Changes in insulin sensitivity and insulin release in relation to glycemia and glucose tolerance in 6416 Finnish men. <i>Diabetes</i> 58:1212-1221, 2009.<br>[PMID: 15576467]<br>Marmot M, Brunner E. Cohort Profile: the Whitehall II study. <i>Int J Epidemiol</i> . 2005; 34:251-6.<br>[PMID: 21441441]<br>Jensen AC et al. Associations of common genetic variants with age-related changes in fasting and postload glucose: evidence from 18 years of follow-up of the Whitehall II cohort. <i>Diabetes</i> . 2011; 60:1617-23.                                                                                                                                                                                                                                                                                                                                                                                                                                                                                                                                                                                                                                                                                                                                                                                                                                                                                                                                                                                                                                                                                                                                                                                                                                                                                                                                   |

\* Call rate to exclude individuals for whom genotyping success rate is less than a certain percentage (to exclude 'bad' samples/DNA)

Supplementary Table 2. Information on genotyping methods, quality control of SNPs, imputation, and statistical analysis for genome-wide association studies and metabochip studies

| Study                                  | Platform                                                                                                                | Genotyping                                                                                            |            |                                                             |                | SNPs that met QC criteria | Imputation software       | MAF                                             | Inclusion criteria Imputation quality* | Association analyses                                           |                   |
|----------------------------------------|-------------------------------------------------------------------------------------------------------------------------|-------------------------------------------------------------------------------------------------------|------------|-------------------------------------------------------------|----------------|---------------------------|---------------------------|-------------------------------------------------|----------------------------------------|----------------------------------------------------------------|-------------------|
|                                        |                                                                                                                         | Genotype calling algorithm                                                                            | MAF        | Call rate*                                                  | $p$ for HWE    |                           |                           |                                                 |                                        | SNPs in meta-analysis                                          | Analyses software |
| <b>Genome-wide association studies</b> |                                                                                                                         |                                                                                                       |            |                                                             |                |                           |                           |                                                 |                                        |                                                                |                   |
| AGES                                   | Illumina 370K                                                                                                           | BeadStudio                                                                                            | -          | $\geq 95\%$                                                 | $> 10^{-6}$    | 315,410                   | MACH                      | -                                               | $r^2$ -hat $\geq 0.30$                 | 2,465,997                                                      | ProbABEL          |
| Amish                                  | Affymetrix 500K                                                                                                         | BRLMM                                                                                                 | -          | $\geq 96\%$                                                 | $> 10^{-6}$    | 382,935                   | MACH                      | -                                               | $r^2$ -hat $\geq 0.30$                 | 2,302,463                                                      | ITSNBN            |
| BASE-ii                                | Affymetrix Genome-Wide Human SNP Array 6.0                                                                              | BRLMM                                                                                                 | $\geq 1\%$ | $\geq 98\%$                                                 | $> 10^{-6}$    | 706,329                   | IMPUTE2                   | $\geq 5\%$                                      | proper-info $\geq 0.80$                | 5,762,436                                                      | SNPtest           |
| BLSA                                   | Illumina 550K                                                                                                           | Beadstudio                                                                                            | $\geq 1\%$ | $\geq 99\%$                                                 | $> 10^{-4}$    | 514,027                   | MACH                      | $\geq 1\%$                                      | $r^2 \geq 0.30$                        | 2,543,602                                                      | MERLIN-OFFLINE    |
| BPROOF                                 | Illumina Omni Express                                                                                                   | GenomeStudio                                                                                          | -          | $> 95\%$                                                    | -              | 722,053                   | MACH                      | $> 1\%$                                         | $r^2 \geq 0.3$                         | 2,450,937                                                      | GRIMP             |
| CHS                                    | Illumina 370-CNV                                                                                                        | BeadStudio                                                                                            | -          | $\geq 97\%$                                                 | $\geq 10^{-5}$ | 306,655**                 | BimBam v0.99              | -                                               | observed/expected variance $\geq 0.30$ | 2,195,299                                                      | R                 |
| CoLaus                                 | Affymetrix 500K                                                                                                         | BRLMM                                                                                                 | -          | $> 70\%$                                                    | $> 10^{-7}$    | 390,631                   | IMPUTE                    | -                                               | proper-info $\geq 0.40$                | 2,439,888                                                      | QUICKTEST         |
| COROGENE CONTROLS                      | Illumina BeadChip Human 610-Quad                                                                                        | ILLUMINUS                                                                                             | $\geq 5\%$ | $\geq 95\%$                                                 | $> 10^{-6}$    | 554,988                   | MACH 1.0 (Hapmap r22 CEU) | -                                               | -                                      | 2,543,887                                                      | ProbABEL          |
| CROATIA-Vis                            | Illumina HumanHap300v1                                                                                                  | BeadStudio                                                                                            | $\geq 1\%$ | $\geq 98\%$                                                 | $> 10^{-6}$    | 308,996                   | MACH                      | NA                                              | NA                                     | 2,543,888                                                      | ProbABEL          |
| DESIR                                  | Illumina Human CNV370-Duo Array and Illumina HAP300 array                                                               | Illumina Beadstation Genotyping Solution GenomeStudio v2010.2                                         | $\geq 1\%$ | $\geq 95\%$                                                 | $> 10^{-4}$    | 291,609                   | IMPUTE                    | $\geq 1\%$                                      | proper-info $\geq 0.40$                | 2,544,187                                                      | SNPtest           |
| EPIC-Obesity Study (obese cases)       | Affymetrix 500K                                                                                                         | BRLMM                                                                                                 | -          | $\geq 90\%$                                                 | $> 10^{-6}$    | 397,438                   | IMPUTE                    | -                                               | proper-info $\geq 0.40$                | 2,381,011                                                      | SNPtest           |
| EPIC-Obesity Study (controls)          | Affymetrix 500K                                                                                                         | BRLMM                                                                                                 | -          | $\geq 90\%$                                                 | $> 10^{-6}$    | 397,438                   | IMPUTE                    | -                                               | proper-info $\geq 0.40$                | 2,428,445                                                      | SNPtest           |
| Erasmus Ruchphen Family Study (ERF)    | Illumina 318K, Illumina 370K and Affymetrix 250K                                                                        | Illumina Bead Studio, BRLMM                                                                           | -          | $\geq 96\%$                                                 | $> 10^{-6}$    | 487,573                   | MACH                      | -                                               | $r^2$ -hat $\geq 0.30$                 | 2,468,052                                                      | ProbABEL          |
| ERGO(ROTTERDAM)                        | Illumina Infinium 550                                                                                                   | BeadStudio                                                                                            | -          | $\geq 97.5\%$                                               | $> 10^{-6}$    | 512,349                   | MACH                      | -                                               | $r^2$ -hat $\geq 0.30$                 | 2,488,215                                                      | MACH2QTL          |
| Fels Longitudinal Study                | Illumina Human 610 Quad v1_B                                                                                            | ILLUMINA'S GenomeStudio (v1.5.16)                                                                     | $\geq 1\%$ | $\geq 90\%$                                                 | $> 10^{-6}$    | 542,711                   | MACH1                     | $\geq 0.02\%$ (SNP has at least 1 heterozygote) | $r^2$ -hat $\geq 0.001$                | 2,547,310                                                      | SOLAR             |
| FamHS                                  | Illumina HumMap 550k, Human610-Quadv1, Human 1M-Duov3                                                                   | BeadStudio                                                                                            | $\geq 1\%$ | $\geq 98\%$                                                 | $> 10^{-6}$    | 501,404                   | MaCH                      | $\geq 1\%$                                      | $r^2$ -hat $\geq 0.30$                 | 2,543,887                                                      | SAS, R            |
| Fenland                                | Affymetrix 500K                                                                                                         | BRLMM                                                                                                 | -          | $\geq 90\%$                                                 | $> 10^{-6}$    | 362,055                   | IMPUTE                    | -                                               | proper-info $\geq 0.40$                | 2,427,084                                                      | SNPtest           |
| Framingham                             | Affymetrix 500K Affymetrix 50K supplemental                                                                             | BRLMM                                                                                                 | -          | $\geq 97\%$                                                 | $> 10^{-6}$    | 378,163                   | MACH                      | -                                               | $r^2$ -hat $\geq 0.30$                 | 2,455,944                                                      | R                 |
| GOYA                                   | Illumina 610K Quad CHIP                                                                                                 | GenCall                                                                                               | $\geq 1\%$ | $\geq 95\%$                                                 | $> 10^{-7}$    | 545,349                   | MACH                      | $\geq 1\%$                                      | proper-info $\geq 0.30$                | 2,543,887                                                      | QUICKTEST         |
| GOOD                                   | Illumina 610K                                                                                                           | BeadStudio                                                                                            | -          | $\geq 98\%$                                                 | $> 10^{-6}$    | 521,160                   | MACH                      | -                                               | $r^2$ -hat $\geq 0.30$                 | 2,503,211                                                      | MACH2QTL          |
| H2000 CASES                            | Illumina Human610-Quad BeadChip                                                                                         | ILLUMINUS                                                                                             | $\geq 5\%$ | $\geq 95\%$                                                 | $> 10^{-6}$    | 555,388                   | MACH 1.0 (Hapmap r22 CEU) | -                                               | -                                      | 2,543,887                                                      | ProbABEL          |
| H2000 CTRLS                            | Illumina Human610-Quad BeadChip                                                                                         | ILLUMINUS                                                                                             | $\geq 5\%$ | $\geq 95\%$                                                 | $> 10^{-6}$    | 555,388                   | MACH 1.0 (Hapmap r22 CEU) | -                                               | -                                      | 2,543,887                                                      | ProbABEL          |
| Health ABC                             | Illumina 1M-Duo                                                                                                         | Beadchip                                                                                              | $\geq 1\%$ | $\geq 97\%$                                                 | $> 10^{-6}$    | 914,263                   | MACH                      | n/a                                             | $r^2$ -hat $\geq 0.30$                 | 2,543,887                                                      | R                 |
| HBCS                                   | Illumina custom made BeadChip Human 670-Quad                                                                            | ILLUMINUS                                                                                             | $\geq 5\%$ | $\geq 95\%$                                                 | $> 10^{-6}$    | 533,491                   | MACH 1.0 (Hapmap r22 CEU) | -                                               | -                                      | 2,543,887                                                      | ProbABEL          |
| HERITAGE Family Study                  | Illumina HumanCNV370-Quad v3.0                                                                                          | ILLUMINA Genome Studio                                                                                | $\geq 1\%$ | $\geq 99\%$                                                 | $> 10^{-6}$    | 324,607                   | MACH                      | $\geq 1\%$                                      | $r^2$ -hat $\geq 0.30$                 | 2,453,887                                                      | ProbABEL          |
| Johnston County Osteoarthritis Project | Illumina Infinium 1M-Duo bead arrays                                                                                    | BeadStudio                                                                                            | $> 0.5\%$  | $> 98\%$                                                    | $> 10^{-4}$    | 1,065,734                 | MACH                      | None                                            | None                                   | 2,543,887 (European Americans)<br>2,823,316 (African American) | R, ProbABEL       |
| KoGES                                  | Affymetrix Genechip 5.0                                                                                                 | birdseed-v2                                                                                           | $\geq 1\%$ | $\geq 95\%$                                                 | $> 10^{-7}$    | 352,228                   | IMPUTE                    | $\geq 1\%$                                      | -                                      | 3,031,006                                                      | PLINK             |
| KORA F3                                | Affymetrix 500K                                                                                                         | BRLMM                                                                                                 | -          | $\geq 90\%$                                                 | -              | 490,032                   | MACH                      | -                                               | $r^2$ -hat $\geq 0.30$                 | 2,416,530                                                      | MACH2QTL          |
| KORA S4/F4                             | Affymetrix 6.0                                                                                                          | Birdseed2                                                                                             | -          | -                                                           | -              | 909,622                   | IMPUTE                    | -                                               | proper-info $\geq 0.40$                | 2,040,316                                                      | SNPtest           |
| LOLIPOP_EW610                          | Illumina Human610                                                                                                       | BeadStudio                                                                                            | $\geq 1\%$ | $\geq 90\%$                                                 | $> 10^{-6}$    | 544,620                   | MACH                      | All                                             | All                                    | 2,543,887                                                      | mach2qtl          |
| LOLIPOP_IA610                          | Illumina Human610                                                                                                       | BeadStudio                                                                                            | $\geq 1\%$ | $\geq 90\%$                                                 | $> 10^{-6}$    | 544,390                   | MACH                      | All                                             | All                                    | 2,177,742                                                      | mach2qtl          |
| LOLIPOP_IA317                          | Illumina HumanHap300K                                                                                                   | BeadStudio                                                                                            | $\geq 1\%$ | $\geq 90\%$                                                 | $> 10^{-6}$    | 245,892                   | MACH                      | All                                             | All                                    | 1,958,375                                                      | mach2qtl          |
| LOLIPOP_IA_P                           | Perlegen custom                                                                                                         | Perlegen custom                                                                                       | $\geq 1\%$ | $\geq 90\%$                                                 | $> 10^{-6}$    | 170,055                   | MACH                      | All                                             | All                                    | 1,958,375                                                      | mach2qtl          |
| MAP                                    | Affymetrix 6.0                                                                                                          | Birdsuite, Broad Institute                                                                            | $\geq 1\%$ | $\geq 95\%$                                                 | $> 10^{-6}$    | 750,173                   | MACH (version 1.0.16a)    | -                                               | -                                      | 2,543,887                                                      | plink             |
| MROS                                   | Illumina HumanOmni1_Quad_v1-0 B                                                                                         | BeadStudio                                                                                            | $\geq 1\%$ | $\geq 97\%$                                                 | $> 10^{-4}$    | 740713                    | MINIMAC                   | $\geq 1\%$                                      | R2MACH $\geq 0.3$                      | 2391250                                                        | R                 |
| ORCADES                                | Illumina HumanHap300v2                                                                                                  | BeadStudio                                                                                            | $\geq 1\%$ | $\geq 98\%$                                                 | $> 10^{-6}$    | 293,687                   | MACH                      | NA                                              | NA                                     | 2,543,888                                                      | ProbABEL          |
| PIVUS                                  | Illumina OmniExpress+MetaboChip                                                                                         | GenomeStudio 2010.3                                                                                   | $\geq 1\%$ | $\geq 99\%$ (MAF $< 5\%$ ) or $\geq 95\%$ (MAF $\geq 5\%$ ) | $> 10^{-6}$    | 738,879                   | IMPUTE2                   | $\geq 1\%$                                      | info $\geq 0.40$                       | 2,611,259                                                      | PLINK             |
| PREVEND                                | Illumina CytoSNP12 v2                                                                                                   | GenomeStudio                                                                                          | $\geq 1\%$ | $\geq 95\%$                                                 | $> 10^{-5}$    | 232,571                   | beagle                    | -                                               | -                                      | 2,269,099                                                      | Plink 1.07        |
| QFS                                    | Illumina 610 Quad chip                                                                                                  | Bead Studio Genotyping software                                                                       | $\geq 1\%$ | $\geq 95\%$                                                 | $> 10^{-4}$    | 543,713                   | MACH                      | $\geq 1\%$                                      | $r^2$ -hat $\geq 0.30$                 | 2,460,214                                                      | GWAF              |
| RISC                                   | Affymetrix 6.0                                                                                                          | Birdseed                                                                                              | $> 1\%$    | $\geq 98\%$                                                 | $> 10^{-4}$    | 747,423                   | MACH                      | $> 1\%$                                         | $r^2$ -hat $\geq 0.30$                 | 2,500,497                                                      | MACH2QTL          |
| RSIII                                  | Illumina / HumanHap 610 QUAD                                                                                            | Genomestudio Genecall                                                                                 | $\geq 1\%$ | $\geq 97.5\%$                                               | $> 10^{-6}$    | 514,073                   | MACH                      | $\geq 1\%$                                      | MACH R <sup>2</sup> $\geq 0.3$         | 2,543,887                                                      | MACHQTL           |
| SHIP                                   | Affymetrix Human SNP Array 6.0                                                                                          | Birdseed V2                                                                                           | $\geq 0\%$ | $\geq 0\%$                                                  | $\geq 0$       | 869,224                   | IMPUTE                    | NA                                              | NA                                     | 2,748,910                                                      | QUICKTEST         |
| SHIP-TREND                             | Illumina Human Omni 2.5                                                                                                 | GenCall                                                                                               | $> 0\%$    | $> 90\%$                                                    | $> 10^{-4}$    | 1,782,967                 | IMPUTE                    | NA                                              | NA                                     | 3,437,411                                                      | QUICKTEST         |
| SOF (Study of Osteoporotic Fractures)  | Illumina HumanOmni1_Quad_v1-0 B                                                                                         | BeadStudio                                                                                            | $\geq 1\%$ | $\geq 97\%$                                                 | $> 10^{-4}$    | 740,713                   | MINIMAC                   | $\geq 1\%$                                      | R2MACH $\geq 0.3$                      | 2,391,250                                                      | R                 |
| SORBS                                  | 500K Affymetrix GeneChip (250K Sty and 250K Nsp arrays, Affymetrix, Inc) and Affymetrix Genome-Wide Human SNP Array 6.0 | BRLMM algorithm (Affymetrix, Inc) for 500K and Birdseed Algorithm for Genome-Wide Human SNP Array 6.0 | $> 1\%$    | $\geq 95\%$                                                 | $> 10^{-4}$    | 378,513                   | IMPUTE                    | $> 1\%$                                         | proper-info $\geq 0.40$                | 2,514,716                                                      | ProbABEL          |
| TwinsUK                                | Illumina 317, Illumina 660, Illumina Omni Express 1M                                                                    | ILLUMINUS                                                                                             | $\geq 1\%$ | $\geq 98\%$                                                 | $> 10^{-6}$    | up to 874,733             | IMPUTE V2                 | $\geq 1\%$                                      | -                                      | 3,044,097                                                      | SNPtest           |
| ULSAM                                  | Illumina Omni2.5+MetaboChip                                                                                             | GenomeStudio 2010.3                                                                                   | $\geq 1\%$ | $\geq 99\%$ (MAF $< 5\%$ ) or $\geq 95\%$ (MAF $\geq 5\%$ ) | $> 10^{-6}$    | 1,587,454                 | IMPUTE2                   | $\geq 1\%$                                      | info $\geq 0.40$                       | 3,189,521                                                      | PLINK             |
| YFS                                    | Illumina custom made BeadChip Human 670-Quad                                                                            | ILLUMINUS                                                                                             | $\geq 5\%$ | $\geq 95\%$                                                 | $> 10^{-6}$    | 546,677                   | MACH 1.0 (Hapmap r22 CEU) | -                                               | -                                      | 2,543,887                                                      | ProbABEL          |
| <b>MetaboChip studies</b>              |                                                                                                                         |                                                                                                       |            |                                                             |                |                           |                           |                                                 |                                        |                                                                |                   |

|                      |                     |                                                   |      |          |                                                                                                                 |         |    |    |    |                                        |         |
|----------------------|---------------------|---------------------------------------------------|------|----------|-----------------------------------------------------------------------------------------------------------------|---------|----|----|----|----------------------------------------|---------|
| DESIR                | Illumina Metabochip | GeneCall                                          |      |          |                                                                                                                 | 194,763 | NA | NA | NA |                                        | PLINK   |
| DILGOM               | Metabochip          | GenCall                                           | none | ≥ 95%    | none                                                                                                            | 183,872 | NA | NA | NA |                                        | PLINK   |
| Ely Study            | Illumina Metabochip | GeneCall                                          | > 0% | ≥ 90%    | > 10 <sup>-6</sup>                                                                                              | 149,302 | NA | NA | NA | 149,302                                | PLINK   |
| EPIC-Norfolk T2D     | Illumina Metabochip | GeneCall                                          | > 0% | ≥ 90%    | > 10 <sup>-6</sup>                                                                                              | 143,294 | NA | NA | NA | 143,294                                | PLINK   |
| Fenland              | Illumina Metabochip | GeneCall                                          | > 0% | ≥ 90%    | > 10 <sup>-6</sup>                                                                                              | 167,085 | NA | NA | NA | 167,085                                | PLINK   |
| HEALTH2006           | Illumina Metabochip | GeneCall                                          | > 0% | ≥ 90%    | > 10 <sup>-7</sup>                                                                                              | 196,725 | NA | NA | NA | NA                                     | PLINK   |
| INVNORM_GXE          | Illumina Metabochip | Birdseed                                          | > 0% | ≥ 90%    | > 10 <sup>-6</sup>                                                                                              | 195,531 | NA | NA | NA | 195,531                                | PLINK   |
| INVNORM_SPT          | Illumina Metabochip | Birdseed                                          | > 0% | ≥ 90%    | > 10 <sup>-6</sup>                                                                                              | 195,567 | NA | NA | NA | 195,567                                | PLINK   |
| KORA F3              | Metabochip          | Genome Studio                                     | none | none     | none                                                                                                            | 185,781 | NA | NA | NA | 142,780                                | PLINK   |
| KORA S4/F4           | Metabochip          | Genome Studio                                     | none | none     | none                                                                                                            | 185,781 | NA | NA | NA | 144,412                                | PLINK   |
| Leipzig Adults       | Illumina Metabochip | GeneCall                                          | > 0% | ≥ 95%    | for MAF ≥ 0.05, HW: p<br>value < 5.7 × 10 <sup>-7</sup> / for<br>provided p for all SNPs but<br>did not exclude | 141,071 | NA | NA | NA | 141,071                                | SNPTEST |
| METSIM               | Illumina Metabochip | BeadStudio version 3.3.7,<br>GenTrain version 1.0 | > 0% | ≥ 98.15% |                                                                                                                 | 194,729 | NA | NA | NA | 139,044 (controls),<br>135,976 (cases) | EMMAX   |
| Whitehall metabochip | Illumina Metabochip | GeneCall                                          | > 0% | ≥ 90%    | > 10 <sup>-6</sup>                                                                                              | 171,257 | NA | NA | NA | 171,257                                | PLINK   |

\* Call rate to exclude SNPs for which less than a certain percentage of individuals were successfully genotyped (i.e. to exclude 'bad' SNPs)

\*\*Further exclusions in CHS are: > 2 duplicate errors or Mendelian inconsistencies, heterozygote frequency = 0.

Supplementary Table 3. Study-specific descriptive statistics of study cohorts

| Study                                                       | Men      |      |      |            |     |           |      |            |      |                    |      |       | Women |          |      |      |            |     |           |      |            |      |                    |      |       |      |
|-------------------------------------------------------------|----------|------|------|------------|-----|-----------|------|------------|------|--------------------|------|-------|-------|----------|------|------|------------|-----|-----------|------|------------|------|--------------------|------|-------|------|
|                                                             | Age, yrs |      |      | BMI, kg/m2 |     | Height, m |      | weight, kg |      | Total fat mass, kg |      | Fat % |       | Age, yrs |      |      | BMI, kg/m2 |     | Height, m |      | weight, kg |      | Total fat mass, kg |      | Fat % |      |
|                                                             | n        | mean | SD   | mean       | SD  | mean      | SD   | mean       | SD   | mean               | SD   | mean  | SD    | n        | mean | SD   | mean       | SD  | mean      | SD   | mean       | SD   | mean               | SD   | mean  | SD   |
| <b>Genome-wide association studies</b>                      |          |      |      |            |     |           |      |            |      |                    |      |       |       |          |      |      |            |     |           |      |            |      |                    |      |       |      |
| AGES                                                        | 1,019    | 49.7 | 5.9  | 25.6       | 3.1 | 1.78      | 0.06 | 81.3       | 11.4 | -                  | -    | 22.0  | 5.5   | 1,356    | 52.0 | 6.5  | 24.9       | 3.8 | 1.64      | 0.05 | 67.1       | 10.5 | -                  | -    | 34.0  | 5.0  |
| Amish                                                       | 406      | 50.7 | 15.0 | 26.5       | 3.4 | 1.72      | 0.06 | 78.2       | 12.1 | 15.9               | 7.5  | 19.7  | 6.5   | 444      | 52.2 | 14.4 | 28.4       | 5.4 | 1.60      | 0.06 | 72.4       | 14.4 | 25.8               | 8.9  | 35.4  | 6.5  |
| BASE II                                                     | 202      | 58.1 | 16.0 | 26.5       | 4.2 | 1.80      | 0.10 | 82.3       | 13.8 | 23.3               | 7.9  | 28.1  | 6.1   | 422      | 57.9 | 15.2 | 25.7       | 5.1 | 1.60      | 0.07 | 68.8       | 13.2 | 26.4               | 8.5  | 38.2  | 6.5  |
| BLSA                                                        | 462      | 71.3 | 15.7 | 27.6       | 4.5 | 1.70      | 0.10 | 84.2       | 16.0 | 26.1               | 9.9  | 30.1  | 6.6   | 382      | 66.5 | 17.2 | 25.9       | 4.8 | 1.60      | 0.07 | 68.3       | 14.0 | 26.8               | 10.3 | 38.1  | 7.4  |
| BPROOF                                                      | 562      | 73.4 | 6.4  | 26.8       | 3.2 | 1.80      | 0.10 | 83.4       | 11.2 | 23.1               | 7.2  | 27.3  | 5.9   | 513      | 73.4 | 5.8  | 27.1       | 4.3 | 1.60      | 0.10 | 72.8       | 12.2 | 28.2               | 8.9  | 38.0  | 6.7  |
| CHS                                                         | 349      | 77.6 | 5.0  | 26.5       | 3.4 | 1.73      | 0.06 | 79.4       | 10.9 | 23.1               | 7.7  | 29.4  | 6.6   | 572      | 76.9 | 4.3  | 26.1       | 4.4 | 1.59      | 0.10 | 66.2       | 12.1 | 28.4               | 9.6  | 42.6  | 7.5  |
| CoLaus                                                      | 2,539    | 52.9 | 10.8 | 26.6       | 4.2 | 1.75      | 0.07 | 81.5       | 13.4 | -                  | -    | 23.9  | 6.0   | 2,850    | 53.9 | 10.7 | 25.2       | 4.9 | 1.62      | 0.07 | 66.4       | 13.0 | -                  | -    | 34.4  | 8.2  |
| COROGENE CONTROLS                                           | 312      | 54.2 | 12.9 | 26.8       | 3.8 | 1.80      | 0.10 | 83.8       | 12.1 | 20.6               | 7.9  | 23.9  | 6.3   | 329      | 52.9 | 13.9 | 26.4       | 5.4 | 1.60      | 0.00 | 70.4       | 14.0 | 25.2               | 10.0 | 34.6  | 8.0  |
| CROATIA-Vis                                                 | 382      | 55.9 | 14.9 | 27.5       | 3.7 | 1.76      | 0.07 | 85.1       | 13.2 | 22.2               | 7.6  | 25.5  | 5.9   | 521      | 56.7 | 16.0 | 27.2       | 4.6 | 1.62      | 0.07 | 71.0       | 12.5 | 25.9               | 8.5  | 35.8  | 6.9  |
| DESIR                                                       | 147      | 58.6 | 5.5  | 23.9       | 1.7 | 1.73      | 0.06 | 71.8       | 7.7  | 14.8               | 4.1  | 20.5  | 4.2   | 481      | 54.6 | 8.7  | 22.1       | 2.3 | 1.60      | 0.06 | 56.6       | 6.9  | 16.4               | 5.1  | 28.3  | 5.8  |
| EPIC-Obesity Study                                          | 1,121    | 63.2 | 8.9  | 28.4       | 3.9 | 1.74      | 0.07 | 85.9       | 13.0 | 19.9               | 7.6  | 26.4  | 7.1   | 1,422    | 62.2 | 8.7  | 28.5       | 5.2 | 1.61      | 0.06 | 74.1       | 13.8 | 28.4               | 11.1 | 43.8  | 10.5 |
| Erasmus Ruchphen Family Study (ERF)                         | 1,145    | 48.9 | 14.2 | 27.2       | 4.2 | 1.75      | 0.07 | 83.1       | 14.0 | 22.1               | 8.8  | 26.8  | 7.1   | 1,430    | 47.9 | 14.4 | 26.5       | 5.0 | 1.62      | 0.07 | 69.3       | 13.7 | 26,5182            | 9.9  | 38.7  | 7.6  |
| RS I                                                        | 1,043    | 63.9 | 5.6  | 25.9       | 2.8 | 1.76      | 0.06 | 80.5       | 10.0 | 23.4               | 7.6  | 28.9  | 6.2   | 1,395    | 64.2 | 6.0  | 26.3       | 3.8 | 1.63      | 0.06 | 70.2       | 10.7 | 28.4               | 8.8  | 29.0  | 6.6  |
| Fels Longitudinal Study                                     | 430      | 48.4 | 18.7 | 27.2       | 4.8 | 1.80      | 0.10 | 86.8       | 16.2 | 20.9               | 8.7  | 23.1  | 6.6   | 486      | 49.4 | 18.1 | 26.8       | 5.6 | 1.60      | 0.10 | 72.7       | 16.0 | 26.2               | 10.0 | 34.9  | 6.9  |
| FamHS                                                       | 1,043    | 55.7 | 13.3 | 29.3       | 4.7 | 1.76      | 0.07 | 90.9       | 15.7 | 29.9               | 10.2 | 27.3  | 7.5   | 1,294    | 56.6 | 12.9 | 28.4       | 6.2 | 1.62      | 0.06 | 74.7       | 17.0 | 33.4               | 13.0 | 37.7  | 8.0  |
| Fenland                                                     | 572      | 44.4 | 7.4  | 27.4       | 3.6 | 1.77      | 0.07 | 86.2       | 13.1 | 24.7               | 8.6  | 28.0  | 6.7   | 740      | 45.2 | 7.2  | 26.5       | 5.3 | 1.64      | 0.06 | 71.1       | 14.7 | 27.4               | 10.7 | 37.6  | 7.7  |
| Framingham                                                  | 1,003    | 64.1 | 11.2 | 26.7       | 2.9 | 1.73      | 0.07 | 80.1       | 10.2 | 22.8               | 6.1  | 28.2  | 5.5   | 1,745    | 64.3 | 11.4 | 26.3       | 4.3 | 1.60      | 0.07 | 67.1       | 11.6 | 27.9               | 8.8  | 41.1  | 7.3  |
| GOYA CASE                                                   | 793      | 43.1 | 6.2  | 35.7       | 5.7 | 1.78      | 0.06 | 113.6      | 19.6 | 38.6               | 6.0  | 34.5  | 5.1   | -        | -    | -    | -          | -   | -         | -    | -          | -    | -                  | -    | -     |      |
| GOYA COHORT                                                 | 921      | 47.8 | 8.6  | 26.1       | 3.6 | 1.77      | 0.07 | 82.2       | 12.5 | 32.9               | 4.3  | 40.4  | 5.2   | -        | -    | -    | -          | -   | -         | -    | -          | -    | -                  | -    | -     |      |
| GOOD                                                        | 940      | 18.9 | 0.6  | 22.4       | 3.2 | 1.82      | 0.07 | 73.9       | 11.6 | 13.2               | 7.9  | 17.1  | 7.4   | -        | -    | -    | -          | -   | -         | -    | -          | -    | -                  | -    | -     |      |
| H2000 CASES                                                 | 475      | 49.4 | 10.4 | 29.6       | 3.6 | 1.80      | 0.10 | 91.4       | 12.5 | 23.4               | 7.5  | 25.3  | 5.4   | 459      | 52.7 | 11.3 | 29.7       | 4.8 | 1.60      | 0.10 | 76.7       | 14.0 | 28.3               | 9.1  | 36.2  | 6.1  |
| H2000 CTRLS                                                 | 463      | 48.0 | 10.0 | 25.4       | 3.0 | 1.80      | 0.10 | 78.4       | 9.9  | 15.6               | 5.4  | 19.6  | 5.1   | 511      | 51.0 | 11.2 | 24.9       | 4.0 | 1.60      | 0.10 | 65.4       | 10.3 | 19.8               | 7.2  | 29.6  | 6.5  |
| Health ABC                                                  | 796      | 73.9 | 2.9  | 27.0       | 3.7 | 1.70      | 0.10 | 81.4       | 12.4 | 24.7               | 6.9  | 30.0  | 4.6   | 713      | 73.7 | 2.8  | 26.1       | 4.4 | 1.60      | 0.10 | 66.3       | 11.7 | 27.1               | 7.6  | 40.2  | 5.3  |
| HBCS                                                        | 671      | 61.4 | 2.7  | 27.6       | 4.3 | 1.80      | 0.10 | 86.4       | 14.4 | 21.1               | 8.8  | 23.8  | 6.0   | 885      | 61.5 | 3.0  | 27.8       | 5.1 | 1.60      | 0.00 | 74.0       | 14.0 | 25.9               | 10.0 | 34.0  | 7.0  |
| HERITAGE Family Study                                       | 244      | 36.5 | 15.0 | 26.7       | 4.9 | 1.80      | 0.06 | 84.4       | 16.2 | 20.0               | 10.8 | 22.7  | 9.0   | 256      | 35.1 | 14.1 | 25.0       | 4.9 | 1.60      | 0.06 | 67.1       | 13.7 | 21.0               | 10.8 | 30.0  | 9.8  |
| Johnston County Osteoarthritis Project (European Americans) | 373      | 65.4 | 10.2 | 29.6       | 4.3 | 1.70      | 0.10 | 89.7       | 14.9 | 25.7               | 7.9  | 28.0  | 4.9   | 623      | 64.4 | 10.5 | 29.4       | 6.4 | 1.60      | 0.10 | 75.2       | 17.0 | 30.7               | 11.0 | 39.4  | 6.0  |
| Johnston County Osteoarthritis Project(African American)    | 154      | 62.2 | 10.2 | 29.4       | 5.3 | 1.70      | 0.10 | 89.2       | 18.2 | 22.0               | 9.1  | 23.8  | 6.2   | 262      | 61.6 | 11.2 | 32.6       | 7.1 | 1.60      | 0.10 | 84.6       | 19.0 | 34.8               | 12.0 | 39.5  | 6.0  |
| KoGES                                                       | 973      | 64.0 | 8.3  | 23.7       | 3.1 | 1.70      | 0.10 | 65.0       | 9.9  | 13.5               | 5.7  | 20.1  | 6.6   | 1,360    | 63.8 | 8.6  | 24.7       | 3.3 | 1.50      | 0.10 | 57.1       | 8.7  | 19.0               | 6.1  | 32.4  | 6.5  |
| KORA F3                                                     | 773      | 62.5 | 10.0 | 28.2       | 3.5 | 1.73      | 0.07 | 84.9       | 12.1 | 24.3               | 7.3  | 28.1  | 5.0   | 787      | 61.6 | 9.9  | 27.9       | 5.0 | 1.61      | 0.06 | 71.9       | 13.2 | 28.1               | 8.5  | 38.4  | 5.2  |
| KORA S4/F4                                                  | 874      | 54.1 | 8.9  | 28.4       | 4.2 | 1.74      | 0.07 | 86.5       | 14.1 | 24.3               | 7.6  | 28.0  | 4.9   | 920      | 53.6 | 8.8  | 27.9       | 5.3 | 1.61      | 0.06 | 72.6       | 13.7 | 27.3               | 8.6  | 37.5  | 5.4  |
| LOLIPOP_EW610                                               | -        | -    | -    | -          | -   | -         | -    | -          | -    | -                  | -    | -     | -     | 249      | 55.7 | 9.7  | 26.6       | 5.1 | 1.60      | 0.07 | 70.6       | 13.8 | 26.8               | 9.8  | 36.9  | 6.7  |
| LOLIPOP_IA610                                               | 5,527    | 55.1 | 10.7 | 26.8       | 4.1 | 1.70      | 0.10 | 77.6       | 13.1 | 22.2               | 9.0  | 27.6  | 7.1   | 10,300   | 56.8 | 10.0 | 28.7       | 5.3 | 1.60      | 0.06 | 69.4       | 12.7 | 27.8               | 9.1  | 39.1  | 6.4  |
| LOLIPOP_IA317                                               | 2,120    | 48.3 | 10.5 | 26.8       | 4.3 | 1.71      | 0.07 | 78.7       | 14.4 | 22.2               | 9.9  | 27.1  | 7.7   | -        | -    | -    | -          | -   | -         | -    | -          | -    | -                  | -    | -     |      |
| LOLIPOP_IA_P                                                | 612      | 51.1 | 8.3  | 27.1       | 4.0 | 1.70      | 0.10 | 79.4       | 13.8 | 22.5               | 9.0  | 27.7  | 6.9   | -        | -    | -    | -          | -   | -         | -    | -          | -    | -                  | -    | -     |      |
| MAP                                                         | 156      | 82.7 | 6.0  | 26.5       | 4.0 | 1.70      | 0.10 | 80.9       | 13.4 | 55.0               | 9.1  | 31.6  | 7.2   | 471      | 82.7 | 6.7  | 26.6       | 5.4 | 1.60      | 0.10 | 66.9       | 14.0 | 40.2               | 5.7  | 38.8  | 6.6  |
| MIOS                                                        | 4,550    | 74.0 | 5.9  | 27.4       | 3.8 | 1.70      | 0.07 | 83.5       | 13.0 | 21.9               | 7.1  | 26.3  | 5.4   | -        | -    | -    | -          | -   | -         | -    | -          | -    | -                  | -    | -     |      |
| ORCADES                                                     | 391      | 54.8 | 15.4 | 28.1       | 4.2 | 1.70      | 0.07 | 85.8       | 13.1 | 23.2               | 8.7  | 26.5  | 6.9   | 469      | 53.1 | 15.5 | 27.3       | 5.3 | 1.61      | 0.06 | 70.7       | 13.6 | 26.5               | 10.1 | 36.3  | 7.3  |
| PIVUS                                                       | 396      | 71.9 | 0.8  | 27.1       | 3.6 | 1.76      | 0.06 | 83.0       | 12.4 | 23.4               | 8.2  | 27.6  | 6.5   | 430      | 71.2 | 0.9  | 27.0       | 4.7 | 1.62      | 0.06 | 70.1       | 12.8 | 27.9               | 9.3  | 38.7  | 7.3  |
| PREVEND                                                     | 1,545    | 62.9 | 8.1  | 27.3       | 3.8 | 1.78      | 0.07 | 86.0       | 12.8 | 24.8               | 8.7  | 28.4  | 7.7   | 1,458    | 61.2 | 7.6  | 27.7       | 5.0 | 1.65      | 0.07 | 75.5       | 13.8 | 29.4               | 10.9 | 38.1  | 8.9  |
| QFS                                                         | 370      | 42.5 | 16.3 | 27.5       | 6.4 | 1.70      | 0.10 | 82.0       | 19.8 | 20.3               | 13.2 | 23.1  | 9.2   | 490      | 42.9 | 16.9 | 27.9       | 8.5 | 1.60      | 0.10 | 71.3       | 21.8 | 24.6               | 14.8 | 32.5  | 10.2 |
| RISC                                                        | 678      | 43.4 | 8.5  | 26.6       | 3.5 | 1.80      | 0.10 | 84.5       | 12.6 | -                  | -    | 34.9  | 7.1   | 825      | 44.5 | 8.2  | 25.0       | 4.4 | 1.60      | 0.10 | 67.6       | 12.5 | NA                 | NA   | 55.1  | 4.5  |
| RS III                                                      | 680      | 55.9 | 5.5  | 27.6       | 3.8 | 1.79      | 0.07 | 88.3       | 11.3 | 25.2               | 9.2  | 27.8  | 6.7   | 914      | 56.3 | 6.0  | 27.2       | 4.7 | 1.65      | 0.06 | 73.9       | 13.2 | 29.5               | 10.4 | 38.9  | 7.5  |
| SHIP                                                        | 940      | 58.3 | 13.5 | 28.7       | 4.0 | 1.80      | 0.10 | 88.4       | 14.1 | 21.9               | 7.3  | 24.3  | 5.2   | 1,073    | 56.8 | 13.3 | 27.9       | 5.5 | 1.60      | 0.00 | 73.9       | 14.0 | 26.1               | 10.0 | 34.3  | 7.0  |
| SHIP-TREND                                                  | 424      | 50.5 | 14.1 | 27.9       | 3.7 | 1.80      | 0.10 | 87.1       | 12.8 | 20.8               | 6.8  | 23.5  | 5.1   | 537      | 50.3 | 13.2 | 26.9       | 5.1 | 1.60      | 0.00 | 72.6       | 14.0 | 25.2               | 9.0  | 33.8  | 7.0  |
| SOF                                                         | -        | -    | -    | -          | -   | -         | -    | -          | -    | -                  | -    | -     | -     | 3,422    | 73.5 | 5.3  | 26.4       | 4.6 | 1.60      | 0.06 | 67.1       | 12.4 | 27.1               | 8.6  | 39.5  | 5.8  |
| SORBS                                                       | 361      | 48.1 | 16.7 | 27.2       | 4.0 | 1.77      | 0.07 | 85.4       | 12.7 | 18.1               | 7.6  | 21.2  | 6.4   | 515      | 48.0 | 15.9 | 16.9       | 5.5 | 1         |      |            |      |                    |      |       |      |



Supplementary Table 4. Loci reaching genome-wide significance ( $P < 5 \times 10^{-8}$ ) for body fat percentage in all ancestry analysis

| SNP                                                          | Chr. | Position (bp) | Nearby gene              | Effect (Fat% increasing) allele | Effect allele frequency <sup>a</sup> | Other allele | All ancestry                                 |       |         |        |                 |                                              |            |         |        |                 |                                              |       | All ancestry - Men |        |                 |                                              |       |         |            |                 |                                              |       |         |        | All ancestry - Women |                                              |       |         |        |                 |            |  |  |  |  |  |
|--------------------------------------------------------------|------|---------------|--------------------------|---------------------------------|--------------------------------------|--------------|----------------------------------------------|-------|---------|--------|-----------------|----------------------------------------------|------------|---------|--------|-----------------|----------------------------------------------|-------|--------------------|--------|-----------------|----------------------------------------------|-------|---------|------------|-----------------|----------------------------------------------|-------|---------|--------|----------------------|----------------------------------------------|-------|---------|--------|-----------------|------------|--|--|--|--|--|
|                                                              |      |               |                          |                                 |                                      |              | GWAS                                         |       |         |        |                 |                                              | MetaboChip |         |        |                 |                                              |       | GWAS               |        |                 |                                              |       |         | MetaboChip |                 |                                              |       |         |        | GWAS                 |                                              |       |         |        |                 | MetaboChip |  |  |  |  |  |
|                                                              |      |               |                          |                                 |                                      |              | Per allele change in body fat % <sup>b</sup> | SE    | P       | N      | Heterogeneity P | Per allele change in body fat % <sup>b</sup> | SE         | P       | N      | Heterogeneity P | Per allele change in body fat % <sup>b</sup> | SE    | P                  | N      | Heterogeneity P | Per allele change in body fat % <sup>b</sup> | SE    | P       | N          | Heterogeneity P | Per allele change in body fat % <sup>b</sup> | SE    | P       | N      | Heterogeneity P      | Per allele change in body fat % <sup>b</sup> | SE    | P       | N      | Heterogeneity P |            |  |  |  |  |  |
| rs1558902                                                    | 16   | 52,361,075    | <i>FTO</i>               | A                               | 40%                                  | T            | 0.048                                        | 0.006 | 7.0E-18 | 74,802 | 0.04            | 0.058                                        | 0.009      | 4.0E-11 | 24,526 | 0.28            | 0.049                                        | 0.008 | 9.6E-11            | 38,228 | 1.1E-03         | 0.054                                        | 0.012 | 7.1E-06 | 13,270     | 0.57            | 0.045                                        | 0.008 | 5.5E-09 | 37,230 | 0.67                 | 0.063                                        | 0.013 | 1.3E-06 | 11,256 | 0.12            |            |  |  |  |  |  |
| rs2943652                                                    | 2    | 226,816,690   | <i>JRS1<sup>+</sup></i>  | C                               | 36%                                  | T            | 0.040                                        | 0.006 | 1.2E-12 | 74,808 | 0.02            | 0.018                                        | 0.009      | 0.04    | 24,515 | 0.01            | 0.058                                        | 0.008 | 6.8E-14            | 38,228 | 0.01            | 0.018                                        | 0.012 | 0.15    | 13,264     | 0.19            | 0.025                                        | 0.008 | 1.5E-03 | 37,236 | 0.62                 | 0.019                                        | 0.013 | 0.16    | 11,251 | 3.2E-03         |            |  |  |  |  |  |
| rs6567160                                                    | 18   | 55,980,115    | <i>MC4R</i>              | C                               | 25%                                  | T            | 0.037                                        | 0.006 | 3.5E-09 | 76,082 | 0.70            | 0.027                                        | 0.010      | 0.009   | 24,560 | 0.90            | 0.047                                        | 0.008 | 1.1E-08            | 39,094 | 0.79            | 0.025                                        | 0.014 | 0.08    | 13,286     | 0.93            | 0.029                                        | 0.009 | 8.6E-04 | 37,644 | 0.68                 | 0.029                                        | 0.015 | 0.050   | 11,274 | 0.55            |            |  |  |  |  |  |
| rs6755502                                                    | 2    | 625,721       | <i>TMEM18</i>            | C                               | 83%                                  | T            | 0.042                                        | 0.007 | 3.5E-09 | 75,306 | 0.09            | 0.031                                        | 0.012      | 0.007   | 24,549 | 0.52            | 0.028                                        | 0.010 | 4.3E-03            | 38,495 | 0.32            | 0.022                                        | 0.016 | 0.17    | 13,283     | 0.56            | 0.055                                        | 0.010 | 4.2E-08 | 37,467 | 0.11                 | 0.042                                        | 0.017 | 0.014   | 11,266 | 0.38            |            |  |  |  |  |  |
| rs6738627                                                    | 2    | 165,252,696   | <i>COBLL1-GRB14</i>      | A                               | 37%                                  | G            | 0.032                                        | 0.006 | 5.4E-07 | 55,628 | 0.27            | 0.027                                        | 0.009      | 0.003   | 24,568 | 0.58            | 0.033                                        | 0.009 | 3.5E-04            | 26,406 | 0.30            | 0.039                                        | 0.012 | 0.002   | 13,292     | 0.56            | 0.032                                        | 0.009 | 3.0E-04 | 29,877 | 0.48                 | 0.013                                        | 0.013 | 0.33    | 11,276 | 0.60            |            |  |  |  |  |  |
| rs693839                                                     | 13   | 79,856,289    | <i>SPRY2<sup>*</sup></i> | C                               | 32%                                  | T            | 0.029                                        | 0.006 | 5.0E-07 | 75,643 | 0.31            | 0.027                                        | 0.009      | 0.004   | 24,547 | 0.19            | 0.033                                        | 0.008 | 2.4E-05            | 38,631 | 0.75            | 0.037                                        | 0.013 | 0.004   | 13,275     | 0.18            | 0.022                                        | 0.008 | 5.1E-03 | 37,668 | 0.28                 | 0.017                                        | 0.014 | 0.22    | 11,272 | 0.34            |            |  |  |  |  |  |
| rs6857                                                       | 19   | 50,084,094    | <i>TOMM40-APOE</i>       | C                               | 83%                                  | T            | 0.050                                        | 0.009 | 8.8E-09 | 65,417 | 0.01            | 0.026                                        | 0.027      | 0.34    | 3,440  | 0.91            | 0.036                                        | 0.012 | 1.9E-03            | 34,503 | 0.03            | 0.022                                        | 0.040 | 0.59    | 1,365      | 0.56            | 0.062                                        | 0.012 | 6.4E-07 | 31,569 | 0.11                 | 0.029                                        | 0.037 | 0.43    | 2,075  | 0.84            |            |  |  |  |  |  |
| rs4788099                                                    | 16   | 28,763,228    | <i>TUJFM-SH2B1</i>       | G                               | 38%                                  | A            | 0.025                                        | 0.006 | 1.1E-05 | 76,108 | 0.89            | 0.033                                        | 0.009      | 1.9E-04 | 24,551 | 0.99            | 0.029                                        | 0.008 | 1.2E-04            | 39,107 | 0.86            | 0.039                                        | 0.012 | 1.2E-03 | 13,278     | 0.90            | 0.023                                        | 0.008 | 3.0E-03 | 37,656 | 0.83                 | 0.026                                        | 0.013 | 0.046   | 11,273 | 0.98            |            |  |  |  |  |  |
| rs9906944                                                    | 17   | 44,446,419    | <i>IGF2BP1</i>           | C                               | 67%                                  | T            | 0.033                                        | 0.006 | 2.9E-08 | 74,338 | 0.05            | -                                            | -          | -       | -      | -               | 0.025                                        | 0.008 | 2.9E-03            | 38,242 | 0.04            | -                                            | -     | -       | -          | -               | 0.036                                        | 0.008 | 1.5E-05 | 36,751 | 0.14                 | -                                            | -     | -       | -      |                 |            |  |  |  |  |  |
| rs543874                                                     | 1    | 176,156,103   | <i>SEC16B</i>            | G                               | 19%                                  | A            | 0.024                                        | 0.007 | 3.7E-04 | 76,135 | 0.74            | 0.049                                        | 0.011      | 5.0E-06 | 24,570 | 0.58            | 0.016                                        | 0.009 | 8.1E-02            | 39,118 | 0.41            | 0.058                                        | 0.015 | 9.1E-05 | 13,292     | 0.83            | 0.036                                        | 0.010 | 1.6E-04 | 37,673 | 0.88                 | 0.039                                        | 0.016 | 0.013   | 11,278 | 0.24            |            |  |  |  |  |  |
| <b>Loci identified in sex-specific all ancestry analyses</b> |      |               |                          |                                 |                                      |              |                                              |       |         |        |                 |                                              |            |         |        |                 |                                              |       |                    |        |                 |                                              |       |         |            |                 |                                              |       |         |        |                      |                                              |       |         |        |                 |            |  |  |  |  |  |
| rs3761445                                                    | 22   | 36,925,357    | <i>PICK1-PLA2G6</i>      | G                               | 41%                                  | A            | 0.022                                        | 0.006 | 4.3E-05 | 75,592 | 1.9E-04         | 0.029                                        | 0.009      | 8.4E-04 | 24,022 | 0.50            | 0.034                                        | 0.007 | 5.3E-06            | 38,605 | 0.01            | 0.047                                        | 0.012 | 6.8E-05 | 13,082     | 0.49            | 0.020                                        | 0.008 | 0.011   | 37,174 | 0.07                 | 0.008                                        | 0.013 | 0.56    | 10,940 | 0.81            |            |  |  |  |  |  |
| rs757318                                                     | 19   | 18,681,308    | <i>CRTC1</i>             | C                               | 50%                                  | A            | 0.022                                        | 0.006 | 7.0E-05 | 74,310 | 0.37            | 0.030                                        | 0.009      | 6.0E-04 | 24,504 | 0.02            | 0.013                                        | 0.008 | 7.7E-02            | 38,224 | 0.62            | 0.010                                        | 0.012 | 0.41    | 13,260     | 0.01            | 0.031                                        | 0.008 | 1.1E-04 | 36,742 | 0.34                 | 0.052                                        | 0.013 | 3.7E-05 | 11,244 | 0.85            |            |  |  |  |  |  |

Chr., Chromosome; Position(bp) according to Build 36; allele coding based on the positive strand; and  $\beta$  is the effect size expressed in SD/allele (i.e. following inverse normal transformation to mean of 0 and SD of 1)

<sup>a</sup>Loci first reported in the previous genome-wide association study of body fat percentage (Kilpeläinen et al. 2011, PMID: 21706003).

<sup>b</sup>Effect allele frequency from all ancestry GWAS and MetaboChip joint meta-analysis.

Supplementary Table 5. Association between 12 loci (identified in all ancestry analyses reaching genome-wide significance) and body fat percentage in European-ancestry GWAS + ExomeChip analyses

| SNP                                             | Chr. | Position (bp) | Nearest gene        | Fat% increasing allele | Effect allele frequency <sup>a</sup> | Other allele | European-Ancestry Sex-combined               |       |         |                    |        |                                              | European-Ancestry - Men |         |                    |        | European-Ancestry - Women                    |       |         |                    | Sex-difference P |       |
|-------------------------------------------------|------|---------------|---------------------|------------------------|--------------------------------------|--------------|----------------------------------------------|-------|---------|--------------------|--------|----------------------------------------------|-------------------------|---------|--------------------|--------|----------------------------------------------|-------|---------|--------------------|------------------|-------|
|                                                 |      |               |                     |                        |                                      |              | Per allele change in body fat % <sup>c</sup> |       | P       | Explained variance | N      | Per allele change in body fat % <sup>c</sup> |                         | P       | Explained variance | N      | Per allele change in body fat % <sup>c</sup> |       | P       | Explained variance |                  | N     |
| $\beta$                                         | SE   | $\beta$       | SE                  | $\beta$                | SE                                   |              |                                              |       |         |                    |        |                                              |                         |         |                    |        |                                              |       |         |                    |                  |       |
| rs1558902                                       | 16   | 52,361,075    | <i>FTO</i>          | A                      | 41%                                  | T            | 0.051                                        | 0.005 | 1.1E-25 | 0.127%             | 87,924 | 0.051                                        | 0.007                   | 1.5E-13 | 0.124%             | 43,514 | 0.051                                        | 0.007 | 1.0E-13 | 0.125%             | 45,066           | 1.00  |
| rs2943652                                       | 2    | 226,816,690   | <i>IRS1</i>         | C                      | 37%                                  | T            | 0.030                                        | 0.005 | 1.3E-09 | 0.042%             | 87,914 | 0.044                                        | 0.007                   | 2.0E-10 | 0.091%             | 43,507 | 0.020                                        | 0.007 | 3.3E-03 | 0.019%             | 45,063           | 0.013 |
| rs6567160                                       | 18   | 55,980,115    | <i>MC4R</i>         | C                      | 24%                                  | T            | 0.030                                        | 0.006 | 7.6E-08 | 0.033%             | 89,234 | 0.038                                        | 0.008                   | 1.4E-06 | 0.053%             | 44,398 | 0.027                                        | 0.008 | 7.2E-04 | 0.026%             | 45,492           | 0.32  |
| rs6755502                                       | 2    | 625,721       | <i>TMEM18</i>       | C                      | 83%                                  | T            | 0.035                                        | 0.006 | 5.5E-08 | 0.034%             | 88,535 | 0.019                                        | 0.009                   | 3.2E-02 | 0.010%             | 43,827 | 0.049                                        | 0.009 | 3.3E-08 | 0.068%             | 45,364           | 0.016 |
| rs6738627                                       | 2    | 165,252,696   | <i>COBLL1-GRB14</i> | A                      | 37%                                  | G            | 0.030                                        | 0.005 | 1.8E-08 | 0.042%             | 76,338 | 0.034                                        | 0.007                   | 4.6E-06 | 0.053%             | 38,247 | 0.026                                        | 0.007 | 5.5E-04 | 0.030%             | 38,746           | 0.41  |
| rs693839                                        | 13   | 79,856,289    | <i>SPRY2</i>        | C                      | 31%                                  | T            | 0.030                                        | 0.005 | 9.3E-09 | 0.038%             | 88,773 | 0.038                                        | 0.007                   | 1.9E-07 | 0.061%             | 43,919 | 0.020                                        | 0.007 | 4.4E-03 | 0.018%             | 45,510           | 0.063 |
| rs6857                                          | 19   | 50,084,094    | <i>TOMM40-APOE</i>  | C                      | 83%                                  | T            | 0.053                                        | 0.009 | 6.8E-10 | 0.077%             | 60,210 | 0.040                                        | 0.012                   | 7.6E-04 | 0.044%             | 29,282 | 0.062                                        | 0.012 | 2.0E-07 | 0.106%             | 31,583           | 0.18  |
| rs4788099                                       | 16   | 28,763,228    | <i>TUFM-SH2B1</i>   | G                      | 40%                                  | A            | 0.026                                        | 0.005 | 8.2E-08 | 0.033%             | 89,242 | 0.031                                        | 0.007                   | 5.3E-06 | 0.046%             | 44,397 | 0.024                                        | 0.007 | 4.5E-04 | 0.027%             | 45,500           | 0.47  |
| rs9906944                                       | 17   | 44,446,419    | <i>IGF2BP1</i>      | C                      | 66%                                  | T            | 0.035                                        | 0.006 | 1.9E-08 | 0.056%             | 64,032 | 0.028                                        | 0.009                   | 1.7E-03 | 0.036%             | 30,580 | 0.036                                        | 0.009 | 3.5E-05 | 0.058%             | 34,107           | 0.52  |
| rs543874                                        | 1    | 176,156,103   | <i>SEC16B</i>       | G                      | 19%                                  | A            | 0.031                                        | 0.006 | 5.3E-07 | 0.029%             | 89,287 | 0.026                                        | 0.009                   | 2.4E-03 | 0.020%             | 44,422 | 0.038                                        | 0.009 | 9.8E-06 | 0.043%             | 45,521           | 0.33  |
| <b>Loci identified in sex-specific analyses</b> |      |               |                     |                        |                                      |              |                                              |       |         |                    |        |                                              |                         |         |                    |        |                                              |       |         |                    |                  |       |
| rs3761445                                       | 22   | 36,925,357    | <i>PICK1-PLA2G6</i> | G                      | 40%                                  | A            | 0.024                                        | 0.005 | 1.4E-06 | 0.027%             | 88,707 | 0.037                                        | 0.007                   | 8.6E-08 | 0.065%             | 43,886 | 0.018                                        | 0.007 | 8.3E-03 | 0.015%             | 45,008           | 0.050 |
| rs757318                                        | 19   | 18,681,308    | <i>CRTC1</i>        | C                      | 51%                                  | A            | 0.024                                        | 0.005 | 1.2E-06 | 0.029%             | 87,402 | 0.010                                        | 0.007                   | 1.4E-01 | 0.005%             | 43,498 | 0.037                                        | 0.007 | 7.5E-08 | 0.068%             | 44,560           | 0.005 |

Chr., Chromosome; Position(bp) according to Build 36; allele coding based on the positive strand; and  $\beta$  is the effect size expressed in SD/allele (i.e. following inverse normal transformation to mean of 0 and SD of 1)<sup>a</sup>Based on European-ancestry sex-combined analysis

Supplementary Table 6. Loci reaching genome-wide significance ( $P < 5 \times 10^{-8}$ ) for body fat percentage in European-ancestry only analysis

| SNP       | Chr. | Position (bp) | Nearby gene        | Fat% increasing allele | Fat% increasing allele frequency <sup>a</sup> | Other allele | European-Ancestry Sex-combined               |       |         |                                              |       |       |                                              |        |       |                                              |         |        |                                              |       |         |                                              |       |       | Sex-difference |         |       |       |         |        |       |       |         |        |       |       |         |        |       |       |         |        |       |
|-----------|------|---------------|--------------------|------------------------|-----------------------------------------------|--------------|----------------------------------------------|-------|---------|----------------------------------------------|-------|-------|----------------------------------------------|--------|-------|----------------------------------------------|---------|--------|----------------------------------------------|-------|---------|----------------------------------------------|-------|-------|----------------|---------|-------|-------|---------|--------|-------|-------|---------|--------|-------|-------|---------|--------|-------|-------|---------|--------|-------|
|           |      |               |                    |                        |                                               |              | GWAS                                         |       |         | Metabochip                                   |       |       | GWAS + Metabochip                            |        |       | GWAS                                         |         |        | Metabochip                                   |       |         | GWAS + Metabochip                            |       |       |                |         |       |       |         |        |       |       |         |        |       |       |         |        |       |       |         |        |       |
|           |      |               |                    |                        |                                               |              | Per allele change in body fat % <sup>c</sup> |       |         | Per allele change in body fat % <sup>c</sup> |       |       | Per allele change in body fat % <sup>c</sup> |        |       | Per allele change in body fat % <sup>c</sup> |         |        | Per allele change in body fat % <sup>c</sup> |       |         | Per allele change in body fat % <sup>c</sup> |       |       |                |         |       |       |         |        |       |       |         |        |       |       |         |        |       |       |         |        |       |
|           |      |               |                    |                        |                                               |              | $\beta$                                      | SE    | P       | $\beta$                                      | SE    | P     | $\beta$                                      | SE     | P     | $\beta$                                      | SE      | P      | $\beta$                                      | SE    | P       | $\beta$                                      | SE    | P     |                | $\beta$ | SE    | P     |         |        |       |       |         |        |       |       |         |        |       |       |         |        |       |
| rs1558902 | 16   | 52,361,075    | <i>FTO</i>         | A                      | 41%                                           | T            | 0.048                                        | 0.006 | 1.1E-16 | 64,496                                       | 0.059 | 0.009 | 9.3E-11                                      | 23,428 | 0.051 | 0.005                                        | 1.1E-25 | 87,924 | 0.049                                        | 0.008 | 3.9E-09 | 30,566                                       | 0.054 | 0.012 | 7.2E-06        | 12,948  | 0.051 | 0.007 | 1.5E-13 | 43,514 | 0.046 | 0.008 | 1.3E-08 | 34,586 | 0.065 | 0.013 | 8.2E-07 | 10,480 | 0.051 | 0.007 | 1.0E-13 | 45,066 | 0.98  |
| rs2943650 | 2    | 226,814,165   | <i>IRS1*</i>       | C                      | 37%                                           | T            | 0.037                                        | 0.006 | 3.4E-10 | 65,778                                       | -     | -     | -                                            | -      | 0.037 | 0.006                                        | 3.6E-10 | 65,778 | 0.058                                        | 0.008 | 3.1E-12 | 31,425                                       | -     | -     | -              | -       | 0.058 | 0.008 | 3.3E-12 | 31,425 | 0.022 | 0.008 | 6.1E-03 | 35,009 | -     | -     | -       | -      | 0.022 | 0.008 | 0.006   | 35,009 | 0.001 |
| rs6857    | 19   | 50,084,004    | <i>TOMM40-APCE</i> | C                      | 83%                                           | T            | 0.055                                        | 0.009 | 9.2E-10 | 57,871                                       | 0.029 | 0.028 | 0.31                                         | 2,339  | 0.053 | 0.009                                        | 6.8E-10 | 60,210 | 0.041                                        | 0.012 | 9.3E-04 | 28,241                                       | 0.029 | 0.040 | 0.479          | 1,041   | 0.040 | 0.012 | 7.6E-04 | 29,282 | 0.065 | 0.013 | 1.8E-07 | 30,285 | 0.028 | 0.039 | 0.462   | 1,298  | 0.062 | 0.012 | 2.0E-07 | 31,583 | 0.18  |
| rs693839  | 13   | 79,856,289    | <i>SPRY2*</i>      | C                      | 31%                                           | T            | 0.030                                        | 0.006 | 1.2E-06 | 65,337                                       | 0.030 | 0.010 | 0.002                                        | 23,436 | 0.030 | 0.005                                        | 9.3E-09 | 88,773 | 0.038                                        | 0.009 | 1.1E-05 | 30,969                                       | 0.036 | 0.013 | 0.005          | 12,950  | 0.038 | 0.007 | 1.9E-07 | 43,919 | 0.020 | 0.008 | 1.7E-02 | 35,024 | 0.022 | 0.014 | 0.124   | 10,486 | 0.020 | 0.007 | 0.004   | 45,510 | 0.082 |
| rs6738627 | 2    | 165,252,696   | <i>COBL1-GRB14</i> | A                      | 37%                                           | G            | 0.032                                        | 0.007 | 1.2E-06 | 52,879                                       | 0.026 | 0.009 | 0.005                                        | 23,459 | 0.030 | 0.005                                        | 1.8E-08 | 76,338 | 0.032                                        | 0.009 | 5.8E-04 | 25,279                                       | 0.038 | 0.012 | 0.002          | 12,968  | 0.034 | 0.007 | 4.6E-06 | 38,247 | 0.032 | 0.009 | 3.8E-04 | 28,255 | 0.012 | 0.013 | 0.359   | 10,491 | 0.026 | 0.007 | 5.5E-04 | 38,746 | 0.42  |
| rs9906944 | 17   | 44,446,419    | <i>IGF2BP1</i>     | C                      | 66%                                           | T            | 0.035                                        | 0.006 | 2.1E-08 | 64,032                                       | -     | -     | -                                            | -      | 0.035 | 0.006                                        | 1.9E-08 | 64,032 | 0.028                                        | 0.009 | 0.002   | 30,580                                       | -     | -     | -              | -       | 0.028 | 0.009 | 0.002   | 30,580 | 0.036 | 0.009 | 3.2E-05 | 34,107 | -     | -     | -       | -      | 0.036 | 0.009 | 3.5E-05 | 34,107 | 0.53  |
| rs6728726 | 2    | 613,976       | <i>TMEM18</i>      | C                      | 84%                                           | T            | 0.038                                        | 0.008 | 1.7E-06 | 65,823                                       | 0.034 | 0.012 | 0.005                                        | 23,443 | 0.037 | 0.007                                        | 2.9E-08 | 89,287 | 0.023                                        | 0.011 | 0.042   | 31,453                                       | 0.027 | 0.016 | 0.098          | 12,962  | 0.024 | 0.009 | 0.009   | 44,415 | 0.052 | 0.011 | 2.0E-06 | 35,027 | 0.042 | 0.017 | 0.015   | 10,481 | 0.049 | 0.009 | 9.8E-08 | 45,508 | 0.054 |

Chr., Chromosome; Position(bp) according to Build 36; allele coding based on the positive strand; and  $\beta$  is the effect size expressed in SD/allele (i.e. following inverse normal transformation to mean of 0 and SD of 1)

\*Loci first reported in the previous genome-wide association study of body fat percentage (Kipela et al. 2011. PMID: 21706003)

<sup>a</sup>Effect allele frequency from European-ancestry sex-combined GWAS and Metabochip joint meta-analysis.

Supplementary Table 7. Association of genome-wide significant body fat percentage loci with adiposity and anthropometric traits

| SNP       | Chr. | Position (bp) | Nearby gene  | Fat% increasing allele | Other allele | Analysis     | BMI <sup>1,5</sup> |       |                 |         | WHR <sub>adjBMI</sub> <sup>3,5</sup> |       |                |         | SAT <sup>6</sup> |                | VAT <sup>6</sup> |           | VAT/SAT <sup>6</sup> |        | Leptin <sup>7</sup> |                |        |          | height <sup>1,5</sup> |                |        |          |       |                |         |
|-----------|------|---------------|--------------|------------------------|--------------|--------------|--------------------|-------|-----------------|---------|--------------------------------------|-------|----------------|---------|------------------|----------------|------------------|-----------|----------------------|--------|---------------------|----------------|--------|----------|-----------------------|----------------|--------|----------|-------|----------------|---------|
|           |      |               |              |                        |              |              | β/allele           | SE    | P value         | N       | β/allele                             | SE    | P value        | N       | Direction        | P value        | N                | Direction | P value              | N      | Direction           | P value        | N      | β/allele | SE                    | P value        | N      | β/allele | SE    | P value        | N       |
| rs1558902 | 16   | 52,361,075    | FTO          | A                      | T            | Sex-combined | 0.081              | 0.003 | <b>1.1E-156</b> | 336,974 | 0.0039                               | 0.004 | 0.26           | 208,248 | +                | <b>6.2E-07</b> | 10,557           | +         | <b>4.6E-04</b>       | 10,557 | -                   | 0.17           | 10,556 | 0.033    | 0.006                 | <b>1.8E-07</b> | 32,041 | -0.010   | 0.003 | 0.0012         | 252,880 |
| rs2943652 | 2    | 226,816,690   | IRS1         | C                      | T            | Sex-combined | 0.014              | 0.003 | <b>2.4E-06</b>  | 335,472 | 0.0001                               | 0.004 | 0.99           | 208,227 | +                | 9.2E-04        | 10,557           | +         | 0.60                 | 10,557 | -                   | <b>4.2E-04</b> | 10,556 | 0.020    | 0.007                 | 0.002          | 32,124 | -0.003   | 0.003 | 0.38           | 253,041 |
| rs6567160 | 18   | 55,980,115    | MC4R         | C                      | T            | Sex-combined | 0.056              | 0.004 | <b>6.7E-59</b>  | 339,006 | -0.0025                              | 0.004 | 0.54           | 209,911 | +                | 0.09           | 10,557           | +         | 0.13                 | 10,557 | -                   | 0.89           | 10,556 | 0.027    | 0.008                 | <b>3.9E-04</b> | 32,057 | 0.025    | 0.004 | <b>2.0E-12</b> | 253,015 |
| rs6755502 | 2    | 625,721       | TMEM18       | C                      | T            | Sex-combined | 0.060              | 0.004 | <b>2.0E-53</b>  | 338,935 | -0.0084                              | 0.005 | 0.07           | 209,871 | +                | <b>6.1E-05</b> | 10,557           | +         | 0.05                 | 10,557 | -                   | 0.34           | 10,556 | 0.026    | 0.008                 | 0.002          | 32,030 | 0.006    | 0.004 | 0.16           | 251,807 |
| rs6738627 | 2    | 165,252,696   | COBLL1-GRB14 | A                      | G            | Sex-combined | 0.011              | 0.003 | 6.1E-04         | 284,773 | -0.0213                              | 0.004 | <b>2.2E-08</b> | 174,672 | +                | 0.02           | 10,557           | +         | 0.51                 | 10,557 | -                   | 0.06           | 10,556 | 0.036    | 0.007                 | <b>8.3E-07</b> | 25,573 | 0.001    | 0.003 | 0.72           | 197,773 |
| rs693839  | 13   | 79,856,289    | SPRY2        | C                      | T            | Sex-combined | 0.010              | 0.003 | 0.003           | 332,804 | 0.0022                               | 0.004 | 0.55           | 203,655 | +                | 0.009          | 10,557           | +         | 0.08                 | 10,557 | +                   | 0.60           | 10,556 | 0.012    | 0.007                 | 0.10           | 29,472 | 0.007    | 0.003 | 0.04           | 252,245 |
| rs6857    | 19   | 50,084,094    | TOMM40-APOE  | C                      | T            | Sex-combined | 0.021              | 0.005 | <b>1.0E-04</b>  | 231,865 | 0.0235                               | 0.006 | <b>1.2E-04</b> | 141,664 | +                | 0.004          | 10,557           | +         | <b>2.1E-04</b>       | 10,557 | +                   | 0.37           | 10,556 | 0.026    | 0.011                 | 0.016          | 26,284 | -0.006   | 0.005 | 0.17           | 236,911 |
| rs4788099 | 16   | 28,763,228    | TUFM-SH2B1   | G                      | A            | Sex-combined | 0.031              | 0.003 | <b>1.1E-24</b>  | 339,148 | 0.0024                               | 0.004 | 0.49           | 209,997 | +                | 0.04           | 10,557           | +         | 0.36                 | 10,557 | -                   | 0.61           | 10,556 | 0.027    | 0.006                 | <b>3.9E-05</b> | 32,158 | 0.002    | 0.003 | 0.42           | 253,217 |
| rs9906944 | 17   | 44,446,419    | IGF2BP1      | C                      | T            | Sex-combined | 0.010              | 0.004 | 0.02            | 234,710 | 0.0096                               | 0.005 | 0.04           | 141,155 | +                | 0.70           | 10,557           | +         | 0.24                 | 10,557 | +                   | 0.19           | 10,556 | 0.013    | 0.007                 | 0.07           | 29,470 | -0.016   | 0.003 | <b>1.1E-06</b> | 245,664 |
| rs543874  | 1    | 176,156,103   | SEC16B       | G                      | A            | Sex-combined | 0.050              | 0.004 | <b>2.3E-40</b>  | 339,078 | -0.0017                              | 0.004 | 0.69           | 209,984 | +                | 0.10           | 10,557           | +         | 0.53                 | 10,557 | -                   | 0.25           | 10,556 | 0.009    | 0.008                 | 0.28           | 32,081 | 0.006    | 0.004 | 0.09           | 253,117 |
| rs3761445 | 22   | 36,925,357    | PICK1-PLA2G6 | G                      | A            | Sex-combined | 0.009              | 0.003 | 0.002           | 335,397 | -0.0015                              | 0.004 | 0.66           | 209,748 | +                | 0.04           | 10,557           | +         | 0.003                | 10,557 | +                   | 0.25           | 10,556 | 0.016    | 0.006                 | 0.015          | 32,153 | 0.012    | 0.003 | <b>6.7E-05</b> | 252,071 |
|           |      |               |              |                        |              | Men          | 0.012              | 0.004 | 0.003           | 152,464 | 0.0027                               | 0.005 | 0.60           | 93,329  | +                | 0.13           | 4,997            | +         | 0.02                 | 4,997  | +                   | 0.11           | 4,997  | 0.016    | 0.010                 | 0.12           | 13,459 | 0.016    | 0.005 | 8.0E-04        | 101,283 |
|           |      |               |              |                        |              | Women        | 0.006              | 0.004 | 0.14            | 171,752 | -0.0048                              | 0.005 | 0.29           | 116,552 | +                | 0.22           | 5,560            | +         | 0.09                 | 5,560  | +                   | 0.83           | 5,559  | 0.016    | 0.008                 | 0.051          | 18,694 | 0.010    | 0.004 | 0.02           | 138,353 |
| rs757318  | 19   | 18,681,308    | CRTC1        | C                      | A            | Sex-combined | 0.017              | 0.003 | <b>3.2E-08</b>  | 338,517 | -0.0049                              | 0.003 | 0.15           | 208,780 | +                | 0.52           | 10,557           | +         | 0.56                 | 10,557 | +                   | 0.56           | 10,556 | -0.004   | 0.007                 | 0.59           | 32,124 | 0.003    | 0.003 | 0.38           | 251,032 |
|           |      |               |              |                        |              | Men          | 0.013              | 0.004 | 0.002           | 152,563 | -0.0017                              | 0.005 | 0.73           | 92,844  | -                | 0.26           | 4,997            | -         | 0.66                 | 4,997  | +                   | 0.33           | 4,997  | -0.009   | 0.011                 | 0.41           | 13,454 | 0.005    | 0.005 | 0.31           | 100,758 |
|           |      |               |              |                        |              | Women        | 0.021              | 0.004 | <b>1.7E-07</b>  | 171,630 | -0.0080                              | 0.005 | 0.08           | 116,069 | +                | 0.11           | 5,560            | +         | 0.12                 | 5,560  | +                   | 0.70           | 5,559  | -0.001   | 0.008                 | 0.92           | 18,670 | 0.003    | 0.004 | 0.53           | 137,848 |

Chr., Chromosome; EA, Effect-allele (body fat percentage increasing allele); NEA, non-effect allele; EAF, Effect allele frequency; Position(bp) according to Build 36; and allele coding based on the positive strand.

<sup>1</sup>Association results were derived from latest Genetic Investigation of ANthropometric Traits consortium (GIANT) GWAS and MetaboChip meta analyses; β is the effect size expressed in SD/allele (i.e. following inverse normal transformation to mean of 0 and SD of 1) for BMI and WHRadjBMI (waist-to-hip ratio adjusted by BMI) and z-score transformed (i.e. mean of 0 and SD of 1) for height.

<sup>2</sup>Association results were derived from European-ancestry analyses except sex-combined BMI analysis (from all ancestry analysis).

<sup>3</sup>Association results for abdominal subcutaneous fat (SAT), visceral fat (VAT), and ratio of visceral fat to subcutaneous fat (VAT/SAT) were obtained from Subcutaneous adipose tissue (SAT)-Visceral adipose tissue (VAT) consortium (Fox et al., 2012 PMID:22589738). "Direction" indicates where the fat% increasing allele is associated with increased (+) or decreased (-) SAT, VAT or VAT/SAT.

<sup>4</sup>Association results for circulating leptin were obtained from circulating leptin consortium (Kilpeläinen et al, in preparation); β is effect size per allele expressed in natural logarithm-transformed (ng/ml).

Supplementary Table 8. Heterogeneity between all ancestry analyses and European analyses for 12 loci identified in all ancestry analyses ( $P < 5E-4$ )

| SNP       | Chr. | Position (bp) | Nearby gene  | Fat% increasing allele | Other allele | All ancestry sex-combined                    |       |       |         |         |                                              |       |       |         |        | European-ancestry sex-combined               |     |       |        |         |                                              |     |       |       |         | All ancestry Men                             |      |     |       |        |                                              |        |     |       |       | European-Ancestry Men                        |        |      |     |       |                                              |         |        |     |       | All ancestry Women                           |         |        |      |  |  |  |  |  |  | European-Ancestry Women |  |  |  |  |  |  |  |  |  | All ancestry BIA |  |  |  |  |  |  |  |  |  | All ancestry DEXA |  |  |  |  |  |  |  |  |  |
|-----------|------|---------------|--------------|------------------------|--------------|----------------------------------------------|-------|-------|---------|---------|----------------------------------------------|-------|-------|---------|--------|----------------------------------------------|-----|-------|--------|---------|----------------------------------------------|-----|-------|-------|---------|----------------------------------------------|------|-----|-------|--------|----------------------------------------------|--------|-----|-------|-------|----------------------------------------------|--------|------|-----|-------|----------------------------------------------|---------|--------|-----|-------|----------------------------------------------|---------|--------|------|--|--|--|--|--|--|-------------------------|--|--|--|--|--|--|--|--|--|------------------|--|--|--|--|--|--|--|--|--|-------------------|--|--|--|--|--|--|--|--|--|
|           |      |               |              |                        |              | Per allele change in body fat % <sup>1</sup> |       |       |         |         | Per allele change in body fat % <sup>1</sup> |       |       |         |        | Per allele change in body fat % <sup>1</sup> |     |       |        |         | Per allele change in body fat % <sup>1</sup> |     |       |       |         | Per allele change in body fat % <sup>1</sup> |      |     |       |        | Per allele change in body fat % <sup>1</sup> |        |     |       |       | Per allele change in body fat % <sup>1</sup> |        |      |     |       | Per allele change in body fat % <sup>1</sup> |         |        |     |       | Per allele change in body fat % <sup>1</sup> |         |        |      |  |  |  |  |  |  |                         |  |  |  |  |  |  |  |  |  |                  |  |  |  |  |  |  |  |  |  |                   |  |  |  |  |  |  |  |  |  |
|           |      |               |              |                        |              | EA                                           | β     | SE    | P       | N       | EA                                           | β     | SE    | P       | N      | EA                                           | β   | SE    | P      | N       | EA                                           | β   | SE    | P     | N       | EA                                           | β    | SE  | P     | N      | EA                                           | β      | SE  | P     | N     | EA                                           | β      | SE   | P   | N     | EA                                           | β       | SE     | P   | N     |                                              |         |        |      |  |  |  |  |  |  |                         |  |  |  |  |  |  |  |  |  |                  |  |  |  |  |  |  |  |  |  |                   |  |  |  |  |  |  |  |  |  |
| rs1558902 | 16   | 52,361,075    | F7D          | A                      | T            | 40%                                          | 0.051 | 0.005 | 3.8E-27 | 99,328  | 41%                                          | 0.051 | 0.005 | 1.1E-25 | 87,924 | 1.00                                         | 40% | 0.051 | 0.0054 | 3.8E-15 | 51,498                                       | 41% | 0.051 | 0.007 | 1.5E-13 | 43,514                                       | 1.00 | 41% | 0.050 | 0.0067 | 7.2E-14                                      | 48,486 | 41% | 0.051 | 0.007 | 1.0E-13                                      | 45,066 | 0.81 | 41% | 0.049 | 0.0058                                       | 9.2E-18 | 62,832 | 40% | 0.051 | 0.008                                        | 8.9E-11 | 35,323 | 0.86 |  |  |  |  |  |  |                         |  |  |  |  |  |  |  |  |  |                  |  |  |  |  |  |  |  |  |  |                   |  |  |  |  |  |  |  |  |  |
| rs2943652 | 2    | 228,816,690   | IRS1         | C                      | T            | 36%                                          | 0.034 | 0.005 | 1.5E-12 | 99,323  | 37%                                          | 0.030 | 0.005 | 1.3E-09 | 87,914 | 0.30                                         | 36% | 0.046 | 0.0065 | 1.3E-12 | 51,492                                       | 36% | 0.044 | 0.007 | 2.0E-10 | 43,507                                       | 0.70 | 36% | 0.023 | 0.0068 | 5.6E-04                                      | 48,487 | 37% | 0.020 | 0.007 | 0.003                                        | 45,063 | 0.47 | 36% | 0.033 | 0.0058                                       | 1.1E-08 | 62,837 | 36% | 0.035 | 0.008                                        | 9.2E-06 | 35,313 | 0.84 |  |  |  |  |  |  |                         |  |  |  |  |  |  |  |  |  |                  |  |  |  |  |  |  |  |  |  |                   |  |  |  |  |  |  |  |  |  |
| rs957160  | 18   | 55,980,115    | MC4R         | C                      | T            | 25%                                          | 0.034 | 0.005 | 1.3E-10 | 100,642 | 24%                                          | 0.030 | 0.006 | 7.6E-08 | 89,234 | 0.36                                         | 26% | 0.042 | 0.0072 | 6.1E-09 | 52,380                                       | 23% | 0.038 | 0.008 | 1.4E-06 | 44,398                                       | 0.50 | 24% | 0.029 | 0.0075 | 1.1E-04                                      | 48,918 | 24% | 0.027 | 0.008 | 7.2E-04                                      | 45,492 | 0.67 | 25% | 0.037 | 0.0066                                       | 3.0E-08 | 62,837 | 24% | 0.029 | 0.009                                        | 1.1E-03 | 36,632 | 0.45 |  |  |  |  |  |  |                         |  |  |  |  |  |  |  |  |  |                  |  |  |  |  |  |  |  |  |  |                   |  |  |  |  |  |  |  |  |  |
| rs6755002 | 2    | 625,721       | TMEM18       | C                      | T            | 83%                                          | 0.039 | 0.006 | 1.4E-10 | 99,855  | 83%                                          | 0.035 | 0.006 | 5.5E-08 | 88,535 | 0.39                                         | 83% | 0.027 | 0.0084 | 0.002   | 51,778                                       | 83% | 0.019 | 0.009 | 3.2E-02 | 43,827                                       | 0.23 | 83% | 0.052 | 0.0087 | 2.7E-09                                      | 48,733 | 83% | 0.049 | 0.009 | 3.3E-08                                      | 45,364 | 0.57 | 83% | 0.044 | 0.0077                                       | 1.5E-08 | 62,821 | 83% | 0.030 | 0.010                                        | 2.9E-03 | 36,051 | 0.27 |  |  |  |  |  |  |                         |  |  |  |  |  |  |  |  |  |                  |  |  |  |  |  |  |  |  |  |                   |  |  |  |  |  |  |  |  |  |
| rs6738627 | 2    | 165,253,696   | COBL1-GRB14  | A                      | G            | 37%                                          | 0.030 | 0.005 | 5.7E-09 | 80,196  | 37%                                          | 0.030 | 0.005 | 1.8E-08 | 76,338 | 1.00                                         | 37% | 0.035 | 0.0073 | 1.9E-06 | 39,688                                       | 37% | 0.034 | 0.007 | 4.6E-06 | 38,247                                       | 0.86 | 37% | 0.026 | 0.0072 | 3.8E-04                                      | 41,153 | 37% | 0.026 | 0.007 | 5.5E-04                                      | 38,746 | 1.00 | 37% | 0.032 | 0.0069                                       | 3.5E-06 | 44,615 | 37% | 0.026 | 0.008                                        | 1.1E-03 | 34,408 | 0.61 |  |  |  |  |  |  |                         |  |  |  |  |  |  |  |  |  |                  |  |  |  |  |  |  |  |  |  |                   |  |  |  |  |  |  |  |  |  |
| rs693839  | 13   | 79,856,289    | SPRY2        | C                      | T            | 32%                                          | 0.028 | 0.005 | 6.6E-09 | 100,190 | 31%                                          | 0.030 | 0.005 | 9.3E-09 | 88,773 | 0.61                                         | 33% | 0.034 | 0.0067 | 3.6E-07 | 61,906                                       | 31% | 0.038 | 0.007 | 1.9E-07 | 43,919                                       | 0.45 | 32% | 0.021 | 0.0069 | 0.002                                        | 48,940 | 31% | 0.020 | 0.007 | 0.004                                        | 45,510 | 0.81 | 32% | 0.025 | 0.006                                        | 4.6E-05 | 62,868 | 31% | 0.036 | 0.008                                        | 8.2E-06 | 36,149 | 0.25 |  |  |  |  |  |  |                         |  |  |  |  |  |  |  |  |  |                  |  |  |  |  |  |  |  |  |  |                   |  |  |  |  |  |  |  |  |  |
| rs6957    | 19   | 50,084,094    | TOMM40-APOE  | C                      | T            | 83%                                          | 0.048 | 0.008 | 6.8E-09 | 68,857  | 83%                                          | 0.053 | 0.009 | 6.8E-10 | 60,210 | 0.45                                         | 84% | 0.035 | 0.0112 | 0.002   | 35,868                                       | 83% | 0.040 | 0.012 | 7.6E-04 | 29,282                                       | 0.58 | 84% | 0.058 | 0.0118 | 7.3E-07                                      | 33,644 | 84% | 0.062 | 0.012 | 2.0E-07                                      | 31,583 | 0.58 | 84% | 0.036 | 0.0107                                       | 6.8E-04 | 42,204 | 84% | 0.068 | 0.013                                        | 9.9E-06 | 25,480 | 0.06 |  |  |  |  |  |  |                         |  |  |  |  |  |  |  |  |  |                  |  |  |  |  |  |  |  |  |  |                   |  |  |  |  |  |  |  |  |  |
| rs4788099 | 16   | 28,763,228    | TJPM-SH2B1   | G                      | A            | 38%                                          | 0.027 | 0.005 | 1.2E-08 | 100,659 | 40%                                          | 0.026 | 0.005 | 8.2E-08 | 89,242 | 0.80                                         | 38% | 0.032 | 0.0064 | 6.7E-07 | 52,385                                       | 40% | 0.031 | 0.007 | 5.3E-06 | 44,397                                       | 0.85 | 39% | 0.024 | 0.0067 | 3.6E-04                                      | 48,929 | 40% | 0.024 | 0.007 | 4.5E-04                                      | 45,500 | 1.00 | 38% | 0.030 | 0.0058                                       | 3.0E-07 | 62,853 | 38% | 0.021 | 0.008                                        | 7.8E-03 | 36,633 | 0.35 |  |  |  |  |  |  |                         |  |  |  |  |  |  |  |  |  |                  |  |  |  |  |  |  |  |  |  |                   |  |  |  |  |  |  |  |  |  |
| rs9906944 | 17   | 44,446,419    | IGFBP1       | C                      | T            | 67%                                          | 0.033 | 0.006 | 2.9E-08 | 74,338  | 66%                                          | 0.035 | 0.006 | 1.9E-08 | 64,032 | 0.67                                         | 68% | 0.025 | 0.0083 | 0.003   | 38,242                                       | 66% | 0.028 | 0.009 | 0.002   | 30,580                                       | 0.65 | 67% | 0.036 | 0.0084 | 1.6E-05                                      | 36,751 | 66% | 0.036 | 0.009 | 3.5E-05                                      | 34,107 | 1.00 | 68% | 0.023 | 0.0082                                       | 4.5E-03 | 39,663 | 67% | 0.046 | 0.009                                        | 1.4E-07 | 33,501 | 0.06 |  |  |  |  |  |  |                         |  |  |  |  |  |  |  |  |  |                  |  |  |  |  |  |  |  |  |  |                   |  |  |  |  |  |  |  |  |  |
| rs543874  | 1    | 176,156,103   | SEC16B       | G                      | A            | 19%                                          | 0.032 | 0.006 | 4.5E-08 | 100,705 | 19%                                          | 0.031 | 0.006 | 5.3E-07 | 89,287 | 0.83                                         | 19% | 0.028 | 0.0079 | 3.7E-04 | 62,410                                       | 19% | 0.026 | 0.009 | 0.002   | 44,422                                       | 0.76 | 19% | 0.037 | 0.0081 | 5.8E-06                                      | 48,951 | 19% | 0.038 | 0.009 | 9.8E-06                                      | 45,521 | 0.85 | 19% | 0.028 | 0.0072                                       | 9.8E-05 | 62,899 | 20% | 0.039 | 0.010                                        | 4.0E-05 | 36,633 | 0.36 |  |  |  |  |  |  |                         |  |  |  |  |  |  |  |  |  |                  |  |  |  |  |  |  |  |  |  |                   |  |  |  |  |  |  |  |  |  |
| rs3761445 | 22   | 36,925,357    | PICK1-PLA2G6 | G                      | A            | 41%                                          | 0.024 | 0.005 | 1.7E-07 | 99,614  | 40%                                          | 0.024 | 0.005 | 1.4E-06 | 88,707 | 1.00                                         | 42% | 0.037 | 0.0063 | 2.5E-09 | 51,687                                       | 40% | 0.037 | 0.007 | 8.6E-08 | 43,886                                       | 1.00 | 40% | 0.017 | 0.0065 | 0.013                                        | 48,114 | 40% | 0.018 | 0.007 | 0.008                                        | 45,008 | 0.81 | 42% | 0.028 | 0.0057                                       | 6.5E-07 | 62,296 | 40% | 0.019 | 0.008                                        | 1.1E-02 | 36,150 | 0.34 |  |  |  |  |  |  |                         |  |  |  |  |  |  |  |  |  |                  |  |  |  |  |  |  |  |  |  |                   |  |  |  |  |  |  |  |  |  |
| rs757315  | 19   | 15,681,308    | CRTC1        | C                      | A            | 50%                                          | 0.024 | 0.005 | 2.1E-07 | 98,814  | 51%                                          | 0.024 | 0.005 | 1.2E-06 | 87,402 | 1.00                                         | 50% | 0.012 | 0.0064 | 0.05    | 61,484                                       | 50% | 0.010 | 0.007 | 0.14    | 43,498                                       | 0.70 | 50% | 0.037 | 0.0067 | 4.8E-08                                      | 47,666 | 51% | 0.037 | 0.007 | 7.6E-08                                      | 44,560 | 1.00 | 49% | 0.023 | 0.0058                                       | 8.9E-05 | 61,024 | 50% | 0.031 | 0.008                                        | 7.3E-05 | 36,623 | 0.42 |  |  |  |  |  |  |                         |  |  |  |  |  |  |  |  |  |                  |  |  |  |  |  |  |  |  |  |                   |  |  |  |  |  |  |  |  |  |

Chr., Chromosome; Position(bp) according to Build 36, allele coding based on the positive strand, and β is the effect size expressed in SD/allele (i.e. following inverse normal transformation to mean of 0 and SD of 1)

EA: Effect Allele Frequency

Supplementary Table 9. Association of genome-wide significant body fat percentage loci with plasma liver enzymes and C reactive protein levels

| SNP       | Chr. | Position (bp) | Nearby gene         | Fat%<br>increasing<br>allele | Other<br>allele | Effect allele<br>freq. (%) | ALP <sup>a</sup> |       |         |        | ALT <sup>a</sup> |       |         |        | AST <sup>a</sup> |       |         |        | GGT <sup>a</sup> |       |         |        | CRP <sup>b</sup> |       |                |                  |
|-----------|------|---------------|---------------------|------------------------------|-----------------|----------------------------|------------------|-------|---------|--------|------------------|-------|---------|--------|------------------|-------|---------|--------|------------------|-------|---------|--------|------------------|-------|----------------|------------------|
|           |      |               |                     |                              |                 |                            | β/allele         | SE    | P value | N      | β/allele         | SE    | P value | N      | β/allele         | SE    | P value | N      | β/allele         | SE    | P value | N      | β/allele         | SE    | P value        | N <sub>max</sub> |
| rs1558902 | 16   | 52,361,075    | <i>FTO</i>          | A                            | T               | 42%                        | 0.002            | 0.001 | 0.25    | 32,573 | 0.003            | 0.002 | 0.10    | 55,382 | -0.001           | 0.002 | 0.62    | 40,202 | 0.004            | 0.002 | 0.06    | 57,589 | 0.032            | 0.007 | <b>2.2E-06</b> | 66,185           |
| rs2943652 | 2    | 226,816,690   | <i>IRS1</i>         | C                            | T               | 39%                        | 0.002            | 0.001 | 0.14    | 32,631 | -0.003           | 0.002 | 0.11    | 55,461 | -0.002           | 0.002 | 0.35    | 40,214 | -0.003           | 0.002 | 0.22    | 57,665 | -0.010           | 0.007 | 0.14           | 66,185           |
| rs6567160 | 18   | 55,980,115    | <i>MC4R</i>         | C                            | T               | 27%                        | 0.003            | 0.001 | 0.06    | 32,541 | 0.001            | 0.002 | 0.50    | 55,349 | 0.002            | 0.002 | 0.35    | 40,170 | 0.000            | 0.003 | 0.97    | 57,573 | 0.029            | 0.008 | <b>1.5E-04</b> | 66,185           |
| rs6755502 | 2    | 625,721       | <i>TMEM18</i>       | C                            | T               | 83%                        | 0.002            | 0.002 | 0.31    | 32,554 | 0.001            | 0.002 | 0.56    | 55,351 | 0.004            | 0.003 | 0.09    | 40,128 | 0.003            | 0.003 | 0.34    | 57,561 | 0.038            | 0.008 | <b>8.2E-06</b> | 66,185           |
| rs6738627 | 2    | 165,252,696   | <i>COBLL1-GRB14</i> | A                            | G               | 38%                        | -0.001           | 0.003 | 0.78    | 12,031 | -0.007           | 0.003 | 0.02    | 30,529 | -0.006           | 0.002 | 0.02    | 30,191 | -0.009           | 0.003 | 0.01    | 30,923 | -0.002           | 0.009 | 0.84           | 66,185           |
| rs693839  | 13   | 79,856,289    | <i>SPRY2</i>        | C                            | T               | 30%                        | 0.000            | 0.001 | 0.97    | 32,535 | 0.003            | 0.002 | 0.15    | 55,318 | 0.002            | 0.002 | 0.47    | 40,204 | -0.001           | 0.002 | 0.64    | 57,548 | 0.004            | 0.007 | 0.52           | 66,185           |
| rs6857    | 19   | 50,084,094    | <i>TOMM40-APOE</i>  | C                            | T               | 84%                        | 0.002            | 0.002 | 0.32    | 27,307 | 0.007            | 0.003 | 0.015   | 50,119 | -0.001           | 0.003 | 0.74    | 35,558 | -0.001           | 0.004 | 0.77    | 50,562 | 0.209            | 0.010 | <b>7.4E-95</b> | 66,185           |
| rs4788099 | 16   | 28,763,228    | <i>TUFM-SH2B1</i>   | G                            | A               | 39%                        | -0.001           | 0.001 | 0.57    | 32,618 | 0.000            | 0.002 | 0.98    | 55,449 | -0.001           | 0.002 | 0.79    | 40,203 | 0.000            | 0.002 | 0.89    | 57,653 | 0.004            | 0.006 | 0.56           | 66,185           |
| rs9906944 | 17   | 44,446,419    | <i>IGF2BP1</i>      | C                            | T               | 69%                        | 0.002            | 0.001 | 0.30    | 32,179 | -0.003           | 0.002 | 0.12    | 50,660 | 0.000            | 0.002 | 0.92    | 35,566 | -0.003           | 0.003 | 0.32    | 52,884 | 0.025            | 0.007 | <b>4.5E-04</b> | 66,185           |
| rs543874  | 1    | 176,156,103   | <i>SEC16B</i>       | G                            | A               | 20%                        | 0.004            | 0.002 | 0.040   | 32,574 | 0.002            | 0.002 | 0.29    | 55,387 | 0.000            | 0.003 | 0.93    | 40,220 | 0.005            | 0.003 | 0.09    | 57,606 | 0.020            | 0.008 | 0.011          | 66,185           |
| rs3761445 | 22   | 36,925,357    | <i>PICK1-PLA2G6</i> | G                            | A               | 41%                        | 0.001            | 0.001 | 0.46    | 32,591 | -0.003           | 0.002 | 0.07    | 55,424 | -0.003           | 0.002 | 0.17    | 40,178 | -0.002           | 0.002 | 0.42    | 57,630 | 0.017            | 0.006 | 0.011          | 66,185           |
| rs757318  | 19   | 18,681,308    | <i>CRTC1</i>        | C                            | A               | 52%                        | 0.000            | 0.001 | 0.90    | 32,304 | 0.002            | 0.002 | 0.16    | 55,135 | -0.001           | 0.002 | 0.69    | 39,893 | 0.003            | 0.002 | 0.17    | 57,341 | 0.010            | 0.006 | 0.12           | 66,185           |

Chr., Chromosome; EA, Effect-allele (body fat percentage increasing allele); NEA, non-effect allele; EAF, Effect allele frequency; Position(bp) according to Build 36; allele coding based on the positive strand; the association results were derived from sex-combined analyses.

<sup>a</sup>Association results for liver enzymes (ALP, alkaline phosphatase; ALT, alanine transaminase; AST, aspartate aminotransferase; and GGT, gamma-glutamyl transferase) were obtained from Chambers et al., 2011 (PMID:22001757); β represents the per-allele change expressed in z-score (Mean of 0; SD of 1).

<sup>b</sup>Association results for C-Reactive protein levels (CRP) were derived from Dehghan et al., 2011 (PMID: 21300955); the β represents the per-allele change expressed as natural logarithmic transformation (mg/L).

Supplementary Table 10. Association of genome-wide significant body fat percentage loci with with pubertal height growth

| SNP       | Chr. | Position (bp) | Nearby gene  | Fat% increasing allele | Other allele | Analysis <sup>a</sup> | Girls (10yrs) and boys (12yrs) |         |                  | Girls (10yrs)   |         |                  | Boys (12yrs)    |         |                  |
|-----------|------|---------------|--------------|------------------------|--------------|-----------------------|--------------------------------|---------|------------------|-----------------|---------|------------------|-----------------|---------|------------------|
|           |      |               |              |                        |              |                       | $\beta$ /allele                | P value | N <sub>max</sub> | $\beta$ /allele | P value | N <sub>max</sub> | $\beta$ /allele | P value | N <sub>max</sub> |
| rs9906944 | 17   | 44,446,419    | IGF2BP1      | C                      | T            | Pre-pubertal height   | -0.013                         | 0.34    | 13,956           | -0.022          | 0.23    | 6,974            | -0.003          | 0.87    | 6,982            |
|           |      |               |              |                        |              | Pubertal growth       | -0.013                         | 0.37    | 10,799           | -0.026          | 0.19    | 5,756            | 0.002           | 0.92    | 5,043            |
|           |      |               |              |                        |              | Pubertal timing       | -0.007                         | 0.67    | 9,228            | -0.008          | 0.73    | 4,946            | -0.006          | 0.81    | 4,282            |
| rs3761445 | 22   | 36,925,357    | PICK1-PLA2G6 | G                      | A            | Pre-pubertal height   | 0.034                          | 0.0072  | 13,948           | 0.029           | 0.09    | 6,968            | 0.038           | 0.03    | 6,980            |
|           |      |               |              |                        |              | Pubertal growth       | -0.004                         | 0.77    | 10,786           | 0.003           | 0.86    | 5,750            | -0.013          | 0.53    | 5,036            |
|           |      |               |              |                        |              | Pubertal timing       | 0.024                          | 0.12    | 9,224            | 0.044           | 0.03    | 4,946            | 0.000           | 0.99    | 4,278            |

Chr., Chromosome; EA, Effect-allele (body fat percentage increasing allele); NEA, non-effect allele; EAF, Effect allele frequency; Position(bp) according to Build 36; and allele coding based on the positive strand.

<sup>a</sup>Association results for pubertal height growth were obtained from the Early Growth Genetics Consortium (Cousminer et al., 2013. PMID:23449627); height in 10y-old girls and 12y-old boys; pubertal growth was calculated as the difference in height of 8y-old girls/boys and their adult height; pubertal timing was calculated as the difference in height of 14y-old girls/boys and their adult height. Height, growth and timing were all standardized to the sex-specific population means.

Supplementary Table 11. Previously-reported genome-wide significant associations listed in the NHGRI GWAS Catalog that lie within 500 kb and  $r^2 > 0.7$  to each of the 12 body fat percentage lead SNPs.

| Region   | Body Fat% SNP (BFS) | BFS Position | $r^2$ | Previously Identified SNPs (PIS) | PIS Position | PMID     | First Author   | Disease/Trait                                            | Previously Reported Gene(s)                         | Body fat% SNP |     |            | Previously Identified SNP |        |            | PIS p-value | Distance between BFS and PIS |
|----------|---------------------|--------------|-------|----------------------------------|--------------|----------|----------------|----------------------------------------------------------|-----------------------------------------------------|---------------|-----|------------|---------------------------|--------|------------|-------------|------------------------------|
|          |                     |              |       |                                  |              |          |                |                                                          |                                                     | Effect Allele | EAF | OR $\beta$ | Effect Allele             | EAF    | OR $\beta$ |             |                              |
| 1q25.2   | rs543874            | 176,156,103  | 0.92  | rs633715                         | 176,119,203  | 21102462 | Elks CE        | Menarche (age at onset)                                  | SEC16B                                              | G             | 19% | C          | 20%                       | -2.6   | -          | 2E-08       | 36,900                       |
| 1q25.2   | rs543874            | 176,156,103  | 1.00  | rs543874                         | 176,156,103  | 20935630 | Speilotes EK   | Body mass index                                          | SEC16B                                              | G             | 19% | G          | 19%                       | 0.22   | +          | 4E-23       | 0                            |
| 1q25.2   | rs543874            | 176,156,103  | 0.96  | rs10913469                       | 176,180,142  | 19079260 | Thorleifsson G | Weight                                                   | SEC16B, RASAL2                                      | G             | 19% | C          | 20%                       | 3.82   | +          | 1E-08       | 24,039                       |
| 2p25.3   | rs6755502           | 625,721      | 1.00  | rs2947411                        | 604,168      | 21102462 | Elks CE        | Menarche (age at onset)                                  | TMEM18                                              | C             | 83% | A          | 17%                       | 2.8    | -          | 2E-08       | 21,553                       |
| 2p25.3   | rs6755502           | 625,721      | 1.00  | rs2867125                        | 612,827      | 20935630 | Speilotes EK   | Body mass index                                          | TMEM18                                              | C             | 83% | C          | 83%                       | 0.31   | +          | 3E-49       | 12,894                       |
| 2p25.3   | rs6755502           | 625,721      | 0.85  | rs6548238                        | 624,905      | 19079261 | Willer CJ      | Body mass index                                          | TMEM18                                              | C             | 83% | C          | 84%                       | 0.26   | +          | 1E-18       | 816                          |
| 2p25.3   | rs6755502           | 625,721      | 1.00  | rs7561317                        | 634,953      | 19079260 | Thorleifsson G | Body mass index                                          | TMEM18                                              | C             | 83% | G          | 84%                       | 6.12   | +          | 4E-17       | 9,232                        |
| 2p25.3   | rs6755502           | 625,721      | 1.00  | rs7561317                        | 634,953      | 19079260 | Thorleifsson G | Weight                                                   | TMEM18                                              | C             | 83% | G          | 84%                       | 6.47   | +          | 2E-18       | 9,232                        |
| 2q24.3   | rs6738627           | 165,252,696  | 0.93  | rs3923113                        | 165,210,095  | 21874001 | Kooner JS      | Type 2 diabetes                                          | GRB14                                               | A             | 37% | A          | 74%                       | 1.09   | -          | 1E-08       | 42,601                       |
| 2q24.3   | rs6738627           | 165,252,696  | 0.72  | rs10195252                       | 165,221,337  | 20935629 | Heid IM        | Waist-hip ratio                                          | GRB14                                               | A             | 37% | T          | 60%                       | 0.05   | -          | 4E-34       | 31,359                       |
| 2q24.3   | rs6738627           | 165,252,696  | 0.72  | rs10195252                       | 165,221,337  | 20886565 | Teslovich TM   | Triglycerides                                            | COBLL1                                              | A             | 37% | C          | 40%                       | -2.01  | -          | 2E-10       | 31,359                       |
| 2q36.3   | rs2943652           | 226,816,690  | 0.77  | rs2943634                        | 226,776,324  | 22581228 | Manning AK     | Fasting insulin-related traits (interaction with BMI)    | IRS1                                                | C             | 36% | C          | 66%                       | 0.018  | -          | 2E-14       | 40,366                       |
| 2q36.3   | rs2943652           | 226,816,690  | 0.97  | rs2943641                        | 226,801,989  | 19734900 | Rung J         | Type 2 diabetes and other traits                         | LOC64673, IRS1                                      | C             | 36% | C          | 63%                       | 1.19   | -          | 9E-12       | 14,701                       |
| 2q36.3   | rs2943652           | 226,816,690  | 1.00  | rs2972146                        | 226,808,942  | 20886565 | Teslovich TM   | HDL cholesterol                                          | IRS1                                                | C             | 36% | C          | 37%                       | 0.46   | +          | 2E-09       | 7,748                        |
| 2q36.3   | rs2943652           | 226,816,690  | 1.00  | rs2972146                        | 226,808,942  | 20886565 | Teslovich TM   | Triglycerides                                            | IRS1                                                | C             | 36% | C          | 37%                       | -1.89  | -          | 2E-08       | 7,748                        |
| 2q36.3   | rs2943652           | 226,816,690  | 0.97  | rs2943650                        | 226,814,165  | 21706003 | Kilpelainen TO | Adiposity                                                | IRS1                                                | C             | 36% | T          | 64%                       | -0.03  | +          | 4E-11       | 2,525                        |
| 2q36.3   | rs2943652           | 226,816,690  | 0.93  | rs925735                         | 226,887,874  | 22479202 | Dastani Z      | Adiponectin levels                                       | IRS1                                                | C             | 36% | G          | 64%                       | -0.02  | +          | 2E-08       | 71,184                       |
| 16p11.2  | rs4788099           | 28,763,228   | 0.76  | rs151181                         | 28,398,018   | 21102463 | Franka A       | Crohn's disease                                          | IL27, SH2B1, EIF3C, LAT, CD19                       | G             | 38% | G          | 39%                       | 1.07   | +          | 2E-11       | 365,210                      |
| 16p11.2  | rs4788099           | 28,763,228   | 0.80  | rs4788084                        | 28,447,349   | 19430480 | Barrett JC     | Type 1 diabetes                                          | IL27                                                | G             | 38% | G          | 42%                       | 1.09   | +          | 3E-13       | 315,879                      |
| 16p11.2  | rs4788099           | 28,763,228   | 0.80  | rs4788084                        | 28,447,349   | 21829393 | Plagnol V      | Type 1 diabetes autoantibodies                           | IL27                                                | G             | 38% | G          | NR                        | 1.15   | +          | 1E-08       | 315,879                      |
| 16p11.2  | rs4788099           | 28,763,228   | 0.97  | rs8049439                        | 28,745,016   | 19915574 | Imielinski M   | Inflammatory bowel disease (early onset)                 | IL27, CCDC101, CLN3, EIF3C, NUPR1, SULT1A1, SULT1A2 | G             | 38% | G          | 37%                       | 1.14   | +          | 2E-09       | 18,212                       |
| 16p11.2  | rs4788099           | 28,763,228   | 1.00  | rs7498665                        | 28,790,742   | 19079260 | Thorleifsson G | Body mass index                                          | SH2B1, ATP2A1                                       | G             | 38% | G          | 44%                       | 3.63   | +          | 3E-10       | 27,514                       |
| 16p11.2  | rs4788099           | 28,763,228   | 1.00  | rs7498665                        | 28,790,742   | 19079260 | Thorleifsson G | Weight                                                   | SH2B1, ATP2A1                                       | G             | 38% | G          | 44%                       | 3.69   | +          | 1E-09       | 27,514                       |
| 16p11.2  | rs4788099           | 28,763,228   | 1.00  | rs7498665                        | 28,790,742   | 19079261 | Willer CJ      | Body mass index                                          | SH2B1                                               | G             | 38% | G          | 41%                       | 0.15   | +          | 5E-11       | 27,514                       |
| 16p11.2  | rs4788099           | 28,763,228   | 1.00  | rs7359397                        | 28,793,160   | 20935630 | Speilotes EK   | Body mass index                                          | SH2B1, APOB48R, SULT1A2, AC138894.2, ATXN2L, TUFM   | G             | 38% | T          | 40%                       | 0.15   | +          | 2E-20       | 29,932                       |
| 16q12.2  | rs1558902           | 52,361,075   | 0.90  | rs9940128                        | 52,358,255   | 22398527 | Kristiansson K | Metabolic syndrome                                       | FTO                                                 | A             | 40% | A          | 42%                       | 0.09   | +          | 2E-09       | 2,820                        |
| 16q12.2  | rs1558902           | 52,361,075   | 1.00  | rs1421085                        | 52,358,455   | 19151714 | Meyre D        | Obesity                                                  | FTO                                                 | A             | 40% | C          | 40%                       | 1.39   | +          | 1E-28       | 2,620                        |
| 16q12.2  | rs1558902           | 52,361,075   | 1.00  | rs1558902                        | 52,361,075   | 19557197 | Heard-Costa NL | Waist circumference                                      | FTO                                                 | A             | 40% | NR         | NR                        | NR     | N/A        | 5E-19       | 0                            |
| 16q12.2  | rs1558902           | 52,361,075   | 1.00  | rs1558902                        | 52,361,075   | 20421936 | Scherag A      | Obesity (extreme)                                        | FTO                                                 | A             | 40% | A          | NA                        | 1.37   | +          | 7E-13       | 0                            |
| 16q12.2  | rs1558902           | 52,361,075   | 1.00  | rs1558902                        | 52,361,075   | 20935630 | Speilotes EK   | Body mass index                                          | FTO                                                 | A             | 40% | A          | 42%                       | 0.39   | +          | 5E-120      | 0                            |
| 16q12.2  | rs1558902           | 52,361,075   | 0.90  | rs1121980                        | 52,366,748   | 18454148 | Loos RJ        | Body mass index                                          | FTO                                                 | A             | 40% | NR         | NR                        | 0.06   | N/A        | 4E-08       | 5,673                        |
| 16q12.2  | rs1558902           | 52,361,075   | 0.93  | rs17817449                       | 52,370,868   | 21552555 | Wang K         | Obesity                                                  | FTO                                                 | A             | 40% | NR         | NR                        | NR     | N/A        | 2E-12       | 9,793                        |
| 16q12.2  | rs1558902           | 52,361,075   | 0.93  | rs8050136                        | 52,373,776   | 19079260 | Thorleifsson G | Body mass index                                          | FTO                                                 | A             | 40% | A          | 41%                       | 8.04   | +          | 1E-47       | 12,701                       |
| 16q12.2  | rs1558902           | 52,361,075   | 0.93  | rs8050136                        | 52,373,776   | 19079260 | Thorleifsson G | Weight                                                   | FTO                                                 | A             | 40% | A          | 41%                       | 7.05   | +          | 5E-36       | 12,701                       |
| 16q12.2  | rs1558902           | 52,361,075   | 0.93  | rs8050136                        | 52,373,776   | 19056611 | Timpson NJ     | Type 2 diabetes                                          | FTO                                                 | A             | 40% | NR         | NR                        | 1.3    | N/A        | 2E-17       | 12,701                       |
| 16q12.2  | rs1558902           | 52,361,075   | 0.93  | rs8050136                        | 52,373,776   | 17463248 | Scott LJ       | Type 2 diabetes                                          | FTO                                                 | A             | 40% | A          | 38%                       | 1.17   | +          | 1E-12       | 12,701                       |
| 16q12.2  | rs1558902           | 52,361,075   | 0.93  | rs8050136                        | 52,373,776   | 17463249 | Zeggini E      | Type 2 diabetes                                          | FTO                                                 | A             | 40% | A          | 40%                       | 1.23   | +          | 7E-14       | 12,701                       |
| 16q12.2  | rs1558902           | 52,361,075   | 0.93  | rs8050136                        | 52,373,776   | 21037115 | Wan ES         | Body mass in chronic obstructive pulmonary disease (BMI) | FTO                                                 | A             | 40% | A          | 39%                       | +      | +          | 4E-08       | 12,701                       |
| 16q12.2  | rs1558902           | 52,361,075   | 0.93  | rs8050136                        | 52,373,776   | 21706003 | Kilpelainen TO | Adiposity                                                | FTO                                                 | A             | 40% | C          | 60%                       | -0.06  | +          | 3E-26       | 12,701                       |
| 16q12.2  | rs1558902           | 52,361,075   | 0.93  | rs9939609                        | 52,378,028   | 21102462 | Elks CE        | Menarche (age at onset)                                  | FTO                                                 | A             | 40% | A          | 40%                       | -2.1   | -          | 3E-08       | 16,953                       |
| 16q12.2  | rs1558902           | 52,361,075   | 0.93  | rs9939609                        | 52,378,028   | 17434869 | Frayling TM    | Body mass index                                          | FTO                                                 | A             | 40% | A          | 39%                       | 0.36   | +          | 2E-20       | 16,953                       |
| 16q12.2  | rs1558902           | 52,361,075   | 0.93  | rs9939609                        | 52,378,028   | 19079261 | Willer CJ      | Body mass index                                          | FTO                                                 | A             | 40% | A          | 41%                       | 0.33   | +          | 4E-51       | 16,953                       |
| 16q12.2  | rs1558902           | 52,361,075   | 0.93  | rs9939609                        | 52,378,028   | 22693455 | Perry JR       | Type 2 diabetes                                          | FTO                                                 | A             | 40% | A          | 40%                       | 1.25   | +          | 1E-20       | 16,953                       |
| 16q12.2  | rs1558902           | 52,361,075   | 0.97  | rs7202116                        | 52,379,116   | 22982992 | Yang J         | Body mass index                                          | FTO                                                 | A             | 40% | G          | 40%                       | 0.04   | +          | 2E-10       | 18,041                       |
| 16q12.2  | rs1558902           | 52,361,075   | 0.87  | rs9941349                        | 52,382,989   | 19553259 | Cotsapas C     | Obesity (extreme)                                        | FTO                                                 | A             | 40% | T          | 43%                       | 1.48   | +          | 6E-12       | 21,914                       |
| 16q12.2  | rs1558902           | 52,361,075   | 0.84  | rs9930506                        | 52,387,966   | 17658951 | Scuteri A      | Obesity-related traits (hip)                             | FTO                                                 | A             | 40% | A          | 54%                       | -0.16  | +          | 3E-08       | 26,891                       |
| 16q12.2  | rs1558902           | 52,361,075   | 0.93  | rs12149832                       | 52,400,409   | 22344221 | Okada Y        | Body mass index                                          | FTO                                                 | A             | 40% | A          | 20%                       | 0.07   | +          | 5E-22       | 39,334                       |
| 16q12.2  | rs1558902           | 52,361,075   | 0.87  | rs11642841                       | 52,402,988   | 20581827 | Voight BF      | Type 2 diabetes                                          | FTO                                                 | A             | 40% | A          | NA                        | 1.13   | +          | 3E-08       | 41,913                       |
| 18q21.32 | rs6567160           | 55,980,115   | 1.00  | rs571312                         | 55,990,749   | 20935630 | Speilotes EK   | Body mass index                                          | MC4R                                                | C             | 25% | A          | 24%                       | 0.23   | +          | 6E-42       | 10,634                       |
| 18q21.32 | rs6567160           | 55,980,115   | 1.00  | rs12967135                       | 56,000,003   | 20886565 | Teslovich TM   | HDL cholesterol                                          | RPS3A, MC4R                                         | C             | 25% | A          | 23%                       | -0.42  | -          | 7E-09       | 19,888                       |
| 18q21.32 | rs6567160           | 55,980,115   | 1.00  | rs17782313                       | 56,002,077   | 19079261 | Willer CJ      | Body mass index                                          | MC4R                                                | C             | 25% | C          | 21%                       | 0.2    | +          | 5E-18       | 21,962                       |
| 18q21.32 | rs6567160           | 55,980,115   | 1.00  | rs17782313                       | 56,002,077   | 18454148 | Loos RJ        | Body mass index                                          | MC4R                                                | C             | 25% | C          | 24%                       | 0.05   | +          | 3E-15       | 21,962                       |
| 18q21.32 | rs6567160           | 55,980,115   | 1.00  | rs17782313                       | 56,002,077   | 20881960 | Lango Allen H  | height                                                   | MC4R                                                | C             | 25% | T          | 76%                       | -0.028 | +          | 4E-11       | 21,962                       |
| 18q21.32 | rs6567160           | 55,980,115   | 1.00  | rs17782313                       | 56,002,077   | 19151714 | Meyre D        | Obesity                                                  | MC4R                                                | C             | 25% | C          | 18%                       | 1.22   | +          | 5E-15       | 21,962                       |
| 18q21.32 | rs6567160           | 55,980,115   | 1.00  | rs17782313                       | 56,002,077   | 20881960 | Lango Allen H  | Height                                                   | MC4R                                                | C             | 25% | T          | 76%                       | -0.03  | +          | 4E-11       | 21,962                       |
| 18q21.32 | rs6567160           | 55,980,115   | 0.81  | rs12970134                       | 56,035,730   | 19079260 | Thorleifsson G | Body mass index                                          | MC4R                                                | C             | 25% | A          | 30%                       | 4.38   | +          | 1E-12       | 55,615                       |
| 18q21.32 | rs6567160           | 55,980,115   | 0.81  | rs12970134                       | 56,035,730   | 19079260 | Thorleifsson G | Weight                                                   | MC4R                                                | C             | 25% | A          | 30%                       | 4.66   | +          | 5E-13       | 55,615                       |
| 18q21.32 | rs6567160           | 55,980,115   | 0.81  | rs12970134                       | 56,035,730   | 18454146 | Chambers JC    | Waist circumference and related phenotypes               | MC4R                                                | C             | 25% | A          | 36%                       | 0.88   | +          | 2E-09       | 55,615                       |
| 19q13.32 | rs6857              | 50,084,094   | 1.00  | rs6857                           | 50,084,094   | 22005931 | Kamboni MI     | Alzheimer's disease (age of onset)                       | PVALB2                                              | C             | 83% | NR         | NR                        | NR     | N/A        | 2E-10       | 0                            |
| 19q13.32 | rs6857              | 50,084,094   | 0.88  | rs2075650                        | 50,087,459   | 23207651 | Davies G       | Cognitive decline                                        | TOMM40                                              | C             | 83% | G          | NA                        | -0.2   |            |             |                              |



NR - Not reported in previous publication. N/A - Not enough information was provided to determine direction of effect.

Supplementary Table 12. Association of genome-wide significant body fat percentage loci with lipid traits and coronary artery disease risk

| SNP       | Chr. | Position (bp) | Nearby gene         | Fat%<br>increasing<br>allele | Other allele | Analysis     | HDL-Cholesterol <sup>f</sup> |       |                |         | LDL-Cholesterol <sup>f</sup> |        |                 |         | Total Cholesterol <sup>f</sup> |        |                |         | Triglycerides <sup>g</sup> |       |                |         | CAD <sup>c</sup> |                |         |  |  |  |  |
|-----------|------|---------------|---------------------|------------------------------|--------------|--------------|------------------------------|-------|----------------|---------|------------------------------|--------|-----------------|---------|--------------------------------|--------|----------------|---------|----------------------------|-------|----------------|---------|------------------|----------------|---------|--|--|--|--|
|           |      |               |                     |                              |              |              | $\beta$ /allele              | SE    | P value        | N       | $\beta$ /allele              | SE     | P value         | N       | $\beta$ /allele                | SE     | P value        | N       | $\beta$ /allele            | SE    | P value        | N       | OR/allele        | P value        | N       |  |  |  |  |
| rs1558902 | 16   | 52,361,075    | <i>FTO</i>          | A                            | T            | Sex-combined | -0.018                       | 0.004 | <b>2.7E-07</b> | 177,879 | -0.002                       | 0.004  | 0.45            | 165,206 | -0.005                         | 0.004  | 0.13           | 177,865 | 0.018                      | 0.004 | <b>2.3E-06</b> | 169,619 | 1.03             | 0.008          | 170,586 |  |  |  |  |
| rs2943652 | 2    | 226,816,690   | <i>IRS1</i>         | C                            | T            | Sex-combined | 0.032                        | 0.004 | <b>8.2E-17</b> | 184,147 | -0.006                       | 0.004  | 0.14            | 170,117 | 0.000                          | 0.004  | 0.98           | 184,310 | -0.027                     | 0.003 | <b>1.3E-13</b> | 174,875 | 0.97             | 8.8E-04        | 213,752 |  |  |  |  |
| rs6567160 | 18   | 55,980,115    | <i>MC4R</i>         | C                            | T            | Sex-combined | -0.026                       | 0.004 | <b>2.9E-09</b> | 185,608 | 0.001                        | 0.004  | 0.86            | 171,573 | -0.007                         | 0.004  | 0.12           | 185,760 | 0.012                      | 0.004 | 8.4E-04        | 176,270 | 1.03             | 0.0019         | 213,556 |  |  |  |  |
| rs6755502 | 2    | 625,721       | <i>TMEM18</i>       | C                            | T            | Sex-combined | -0.013                       | 0.005 | 0.008          | 186,633 | -0.010                       | 0.005  | 0.02            | 172,577 | -0.006                         | 0.005  | 0.14           | 186,801 | 0.008                      | 0.004 | 0.03           | 177,323 | 1.03             | 0.02           | 213,488 |  |  |  |  |
| rs6738627 | 2    | 165,252,696   | <i>COBLL1-GRB14</i> | A                            | G            | Sex-combined | 0.019                        | 0.004 | <b>4.9E-05</b> | 129,391 | -0.012                       | 0.005  | 0.04            | 116,028 | -0.013                         | 0.004  | 0.02           | 129,330 | -0.017                     | 0.004 | <b>3.3E-05</b> | 119,979 | 0.98             | 0.06           | 199,002 |  |  |  |  |
| rs693839  | 13   | 79,856,289    | <i>SPRY2</i>        | C                            | T            | Sex-combined | -0.001                       | 0.004 | 0.91           | 181,390 | 0.005                        | 0.004  | 0.20            | 167,399 | 0.000                          | 0.004  | 0.85           | 181,568 | -0.002                     | 0.004 | 0.46           | 172,078 | 0.99             | 0.51           | 206,738 |  |  |  |  |
| rs6857    | 19   | 50,084,094    | <i>TOMM40-APOE</i>  | C                            | T            | Sex-combined | 0.067                        | 0.008 | <b>2.6E-17</b> | 86,306  | -0.192                       | 0.008  | <b>5.1E-110</b> | 82,050  | -0.164                         | 0.008  | <b>1.7E-86</b> | 86,277  | -0.054                     | 0.007 | <b>4.6E-19</b> | 82,963  | 0.90             | <b>5.9E-11</b> | 103,603 |  |  |  |  |
| rs4788099 | 16   | 28,763,228    | <i>TUFM-SH2B1</i>   | G                            | A            | Sex-combined | -0.012                       | 0.004 | 5.4E-04        | 185,489 | -0.003                       | 0.004  | 0.41            | 171,467 | -0.008                         | 0.004  | 0.03           | 185,637 | -0.002                     | 0.003 | 0.57           | 176,156 | 1.01             | 0.33           | 213,432 |  |  |  |  |
| rs9906944 | 17   | 44,446,419    | <i>IGF2BP1</i>      | C                            | T            | Sex-combined | -0.012                       | 0.005 | 0.03           | 92,820  | 0.003                        | 0.006  | 0.39            | 88,433  | -0.001                         | 0.006  | 0.70           | 93,067  | 0.003                      | 0.005 | 0.84           | 89,485  | 1.04             | <b>2.2E-06</b> | 211,220 |  |  |  |  |
| rs543874  | 1    | 176,156,103   | <i>SEC16B</i>       | G                            | A            | Sex-combined | -0.011                       | 0.004 | 0.02           | 187,131 | -0.010                       | 0.005  | 0.07            | 173,055 | -0.011                         | 0.004  | 0.04           | 187,324 | 0.004                      | 0.004 | 0.21           | 177,828 | 1.00             | 0.96           | 213,938 |  |  |  |  |
| rs3761445 | 22   | 36,925,357    | <i>PICK1-PLA2G6</i> | G                            | A            | Sex-combined | 0.016                        | 0.004 | <b>3.9E-06</b> | 185,166 | -0.008                       | 0.004  | 0.04            | 171,168 | -0.010                         | 0.004  | 0.01           | 185,291 | -0.023                     | 0.003 | <b>8.1E-12</b> | 175,846 | 1.00             | 0.83           | 201,748 |  |  |  |  |
|           |      |               |                     |                              |              |              |                              |       |                |         |                              |        |                 |         |                                |        |                |         |                            |       |                |         |                  |                |         |  |  |  |  |
|           |      |               |                     |                              |              |              | Men                          | +     | 0.05           | 38,970  | -                            | 0.43   | 36,840          | -       | 0.38                           | 39,104 | -              | 0.0025  | 35,288                     | 1.01  | 0.33           | 165,789 |                  |                |         |  |  |  |  |
| Women     | +    | 0.04          | 64,118              | -                            | 0.51         | 61,803       | -                            | 0.22  | 64,235         | -       | 0.02                         | 59,473 | 1.00            | 0.88    | 138,333                        |        |                |         |                            |       |                |         |                  |                |         |  |  |  |  |
| rs757318  | 19   | 18,681,308    | <i>CRTC1</i>        | C                            | A            | Sex-combined | -0.003                       | 0.004 | 0.54           | 183,160 | -0.005                       | 0.004  | 0.23            | 169,133 | -0.006                         | 0.004  | 0.14           | 183,303 | 0.003                      | 0.004 | 0.31           | 173,822 | 1.02             | 0.18           | 95,655  |  |  |  |  |
|           |      |               |                     |                              |              |              | Men                          | -     | 0.32           | 38,970  | -                            | 0.40   | 36,840          | -       | 0.55                           | 39,104 | +              | 0.36    | 35,288                     | 1.01  | 0.50           | 58,594  |                  |                |         |  |  |  |  |
|           |      |               |                     |                              |              |              | Women                        | -     | 0.56           | 64,118  | -                            | 0.76   | 61,803          | -       | 0.96                           | 64,235 | +              | 0.71    | 59,473                     | 1.03  | 0.17           | 35,033  |                  |                |         |  |  |  |  |

Chr., Chromosome; EA, Effect-allele (body fat percentage increasing allele); NEA, non-effect allele; EAF, Effect allele frequency (EAF for lipid traits derived from the 1000 genome project); Position(bp) according to Build 36; and allele coding based on the positive strand.

<sup>f</sup>Association results for HDL cholesterol (HDL-C), LDL cholesterol (LDL-C), total cholesterol (TC) and triglyceride (TG) levels were obtained from the GLOBAL Lipids Genetics Consortium (GLGC) (Willer et al., 2013. PMID:24097068);  $\beta$  is the effect size expressed in SD/allele (i.e. following inverse normal transformation to mean of 0 and SD of 1). For sex-specific analyses, no effect sizes were available; the "+/-" indicates whether the fat%-increasing allele is associated with increased (+) or decreased (-) lipid levels.

<sup>c</sup>Association results (OR: odds ratio) for risk of coronary artery disease (CAD) were obtained from the CARDIoGRAMplusC4D Consortium (Deloukas et al., 2013. PMID:23202125); the unit in effect for coronary artery disease was odds ratio (OR); the SNP of rs2943646 was used as a proxy for rs2943652 ( $R^2=1$ , and  $D'=1$ ); the SNP of rs2075650 was used as a proxy for rs6857 ( $R^2=0.88$ , and  $D'=1$ ); and the proxy SNP (rs4794018) was used for rs9906944 ( $R^2=0.9$ , and  $D'=1$ ).

Supplementary Table 13. Association of genome-wide significant body fat percentage loci with glycemic traits and type 2 diabetes risk

| SNP       | Chr. | Position (bp) | Nearby gene         | Fat% increasing allele | Other allele | Analysis     | Fasting glucose <sup>a</sup> |       |         |         | Fasting insulin <sup>a</sup> |       |                |        | Adiponectin <sub>log<sub>10</sub>pmol/L</sub> <sup>b</sup> |       |                |        | Type 2 Diabetes <sup>c</sup> |                |        |
|-----------|------|---------------|---------------------|------------------------|--------------|--------------|------------------------------|-------|---------|---------|------------------------------|-------|----------------|--------|------------------------------------------------------------|-------|----------------|--------|------------------------------|----------------|--------|
|           |      |               |                     |                        |              |              | β/allele                     | SE    | P value | N       | β/allele                     | SE    | P value        | N      | β/allele                                                   | SE    | P value        | N      | OR/allele                    | P value        | N      |
| rs1558902 | 16   | 52,361,075    | <i>FTO</i>          | A                      | T            | Sex-combined | 0.006                        | 0.002 | 0.0039  | 115,626 | 0.019                        | 0.003 | <b>1.8E-12</b> | 82,970 | 0.003                                                      | 0.005 | 0.47           | 29,297 | 1.12                         | <b>4.4E-21</b> | 79,535 |
| rs2943652 | 2    | 226,816,690   | <i>IRS1</i>         | C                      | T            | Sex-combined | -0.004                       | 0.002 | 0.084   | 115,530 | -0.015                       | 0.003 | <b>3.8E-08</b> | 82,506 | 0.022                                                      | 0.004 | <b>3.1E-06</b> | 29,311 | 0.92                         | <b>4.7E-12</b> | 79,290 |
| rs6567160 | 18   | 55,980,115    | <i>MC4R</i>         | C                      | T            | Sex-combined | 0.006                        | 0.003 | 0.030   | 119,317 | 0.008                        | 0.003 | 0.018          | 85,501 | -0.007                                                     | 0.005 | 0.18           | 29,307 | 1.07                         | <b>6.0E-07</b> | 80,620 |
| rs6755502 | 2    | 625,721       | <i>TMEM18</i>       | C                      | T            | Sex-combined | 0.006                        | 0.003 | 0.031   | 117,782 | 0.007                        | 0.004 | 0.06           | 84,051 | 0.005                                                      | 0.006 | 0.37           | 27,578 | 1.04                         | 0.0052         | 86,188 |
| rs6738627 | 2    | 165,252,696   | <i>COBLL1-GRB14</i> | A                      | G            | Sex-combined | -0.001                       | 0.002 | 0.58    | 97,004  | -0.009                       | 0.003 | 0.0035         | 72,356 | 0.015                                                      | 0.005 | 0.008          | 20,653 | 0.94                         | <b>2.3E-05</b> | 54,640 |
| rs693839  | 13   | 79,856,289    | <i>SPRY2</i>        | C                      | T            | Sex-combined | -0.001                       | 0.002 | 0.83    | 120,901 | 0.001                        | 0.003 | 0.80           | 82,955 | 0.003                                                      | 0.005 | 0.53           | 29,287 | 0.98                         | 0.09           | 82,279 |
| rs6857    | 19   | 50,084,094    | <i>TOMM40-APOE</i>  | C                      | T            | Sex-combined | 0.010                        | 0.004 | 0.012   | 77,452  | 0.003                        | 0.005 | 0.49           | 56,354 | -0.012                                                     | 0.007 | 0.09           | 25,623 | 1.09                         | 0.0014         | 31,256 |
| rs4788099 | 16   | 28,763,228    | <i>TUFM-SH2B1</i>   | G                      | A            | Sex-combined | 0.000                        | 0.002 | 0.92    | 116,851 | 0.008                        | 0.003 | 0.0028         | 83,233 | -0.002                                                     | 0.004 | 0.67           | 29,345 | 1.02                         | 0.11           | 80,650 |
| rs9906944 | 17   | 44,446,419    | <i>IGF2BP1</i>      | C                      | T            | Sex-combined | 0.002                        | 0.003 | 0.59    | 80,010  | 0.000                        | 0.004 | 0.97           | 58,124 | 0.000                                                      | 0.005 | 0.95           | 29,203 | 1.05                         | <b>7.7E-05</b> | 80,649 |
| rs543874  | 1    | 176,156,103   | <i>SEC16B</i>       | G                      | A            | Sex-combined | 0.005                        | 0.003 | 0.04    | 119,361 | 0.012                        | 0.003 | <b>5.1E-04</b> | 85,499 | 0.003                                                      | 0.006 | 0.57           | 29,319 | 1.02                         | 0.20           | 86,195 |
| rs3761445 | 22   | 36,925,357    | <i>PICK1-PLA2G6</i> | G                      | A            | Sex-combined | -0.001                       | 0.002 | 0.72    | 123,325 | -0.004                       | 0.003 | 0.10           | 85,340 | 0.000                                                      | 0.004 | 0.96           | 29,344 | 0.97                         | 0.012          | 78,765 |
|           |      |               |                     |                        |              | Men          | -0.002                       | 0.003 | 0.50    | 59,155  | -0.009                       | 0.004 | 0.02           | 41,299 | 0.002                                                      | 0.007 | 0.80           | 12,661 | 0.97                         | 0.035          | 44,233 |
|           |      |               |                     |                        |              | Women        | 0.000                        | 0.003 | 0.89    | 64,170  | 0.000                        | 0.004 | 0.95           | 44,041 | -0.002                                                     | 0.006 | 0.79           | 16,683 | 0.97                         | 0.09           | 35,771 |
| rs757318  | 19   | 18,681,308    | <i>CRTC1</i>        | C                      | A            | Sex-combined | 0.003                        | 0.002 | 0.16    | 123,332 | 0.008                        | 0.003 | 0.0039         | 85,395 | 0.005                                                      | 0.004 | 0.30           | 29,344 | 1.02                         | 0.15           | 72,259 |
|           |      |               |                     |                        |              | Men          | 0.003                        | 0.003 | 0.26    | 59,264  | 0.007                        | 0.004 | 0.08           | 41,363 | 0.002                                                      | 0.007 | 0.73           | 12,662 | 1.01                         | 0.60           | 41,031 |
|           |      |               |                     |                        |              | Women        | 0.003                        | 0.003 | 0.37    | 64,068  | 0.008                        | 0.004 | 0.02           | 44,032 | 0.008                                                      | 0.006 | 0.20           | 16,681 | 1.03                         | 0.12           | 31,889 |

Chr., Chromosome; EA, Effect-allele (body fat percentage increasing allele); NEA, non-effect allele; EAF, Effect allele frequency; Position(bp) according to Build 36; and allele coding based on the positive strand.

<sup>a</sup>Association results for glycemic traits were obtained from the Meta-Analyses of Glucose and Insulin traits (MAGIC) consortium (Scott et al., 2012. PMID:22885924); the β represents the per-allele change in fasting glucose (mmol/L), fasting insulin (natural logarithm-transformed pmol/L).

<sup>b</sup>Association results for adiponectin levels were obtained from AdipoGen Consortium (Dastani et al., 2012. PMID:22479202); β represents the per-allele effect of adiponectin levels (natural logarithmic transformed) adjusted for age, sex, and BMI.

<sup>c</sup>Association results for risk of type 2 diabetes (T2D) were obtained from the DIAGRAM Consortium (Morris et al., 2012. PMID:22885922); the SNP of rs4794018 was used as a proxy for rs9906944 (R<sup>2</sup>=0.9, and D'<sup>2</sup>=1) for the sex-combined result.

Supplementary Table 14. Results of conditional analysis of body fat percentage and lipid associations in TOMM40/APOE locus.

| Outcome Trait <sup>a</sup>                      | Original meta-analysis result (not conditioned) |                           |               |                             |        |       |          | Conditional analyses (GCTA) |                |                |        |       |         |
|-------------------------------------------------|-------------------------------------------------|---------------------------|---------------|-----------------------------|--------|-------|----------|-----------------------------|----------------|----------------|--------|-------|---------|
|                                                 | Target SNP                                      | Primary association trait | Effect allele | Effect allele frequency (%) | beta   | se    | p-value  | Target SNP                  | Conditional on | r <sup>2</sup> | beta   | se    | p-value |
| <b>Body fat percentage (INV) (n = 100,705)</b>  | <b>rs6857</b>                                   | <b>Body fat %</b>         | C             | 84%                         | 0.048  | 0.008 | 6.8E-09  | <b>rs6857</b>               | rs2075650      | 0.88           | 0.016  | 0.006 | 4.4E-03 |
|                                                 | rs2075650                                       | Alzheimer's               | A             | 85%                         | 0.037  | 0.007 | 1.4E-07  | rs2075650                   | rs6857         |                | 0.008  | 0.005 | 0.10    |
|                                                 | <b>rs6857</b>                                   | <b>Body fat %</b>         | C             | 84%                         | 0.048  | 0.008 | 6.8E-09  | <b>rs6857</b>               | rs439401       | 0.04           | 0.047  | 0.008 | 4.2E-09 |
|                                                 | rs439401                                        | Triglyceride and HDL-     | T             | 37%                         | 0.002  | 0.005 | 0.72     | rs439401                    | rs6857         |                | -0.006 | 0.005 | 0.27    |
|                                                 | <b>rs6857</b>                                   | <b>Body fat %</b>         | C             | 84%                         | 0.048  | 0.008 | 6.8E-09  | <b>rs6857</b>               | rs4420638      | 0.39           | 0.024  | 0.006 | 4.4E-05 |
|                                                 | rs4420638                                       | LDL-C                     | A             | 82%                         | 0.036  | 0.009 | 3.9E-05  | rs4420638                   | rs6857         |                | 0.000  | 0.006 | 1.00    |
| <b>Triglycerides (INV) (n = 177,828)</b>        | rs439401                                        | Triglyceride and HDL-     | T             | 37%                         | -0.066 | 0.004 | 1.4E-66  | rs439401                    | rs6857         | 0.04           | -0.060 | 0.004 | 9.0E-58 |
|                                                 | <b>rs6857</b>                                   | <b>Body fat %</b>         | C             | 84%                         | -0.054 | 0.007 | 4.5E-19  | <b>rs6857</b>               | rs439401       |                | -0.028 | 0.007 | 3.6E-05 |
| <b>HDL-cholesterol levels (INV) (n=187,131)</b> | rs439401                                        | Triglyceride and HDL-     | T             | 37%                         | 0.027  | 0.004 | 2.3E-10  | rs439401                    | rs6857         | 0.04           | 0.020  | 0.004 | 2.5E-07 |
|                                                 | <b>rs6857</b>                                   | <b>Body fat %</b>         | C             | 84%                         | 0.067  | 0.008 | 2.6E-17  | <b>rs6857</b>               | rs439401       |                | 0.056  | 0.008 | 8.4E-14 |
| <b>LDL-cholesterol levels (INV) (n=173,055)</b> | rs4420638                                       | LDL-C                     | A             | 82%                         | -0.225 | 0.008 | 1.5E-178 | rs4420638                   | rs6857         | 0.39           | -0.088 | 0.005 | 2.0E-73 |
|                                                 | <b>rs6857</b>                                   | <b>Body fat %</b>         | C             | 84%                         | -0.192 | 0.008 | 5.1E-110 | <b>rs6857</b>               | rs4420638      |                | 0.000  | 0.005 | 0.97    |

Rs6857 was identified in our meta-analyses as the body fat percentage associated variant; rs439401 was previously identified for its association with triglyceride and HDL-cholesterol levels; and rs4420638 was previously identified for its association with LDL-cholesterol levels.

INV, inverse-normal transformation (mean of 0, SD of 1);

<sup>a</sup>Summary statistics of lipid associations were obtained from the GLOBAL Lipids Genetics Consortium (GLGC) (Willer et al., 2013. PMID:24097068)

**Supplementary Table 15. Putative coding variants in linkage disequilibrium ( $r^2 > 0.7$ ) with body fat percentage loci identified in all ancestry analyses ( $P < 5 \times 10^{-6}$ )**

| SNP       | Chr. | Source | Gene          | Position (bp) | Putative Coding Variant | $r^2$ | Protein Alteration | PhastCons Score | GERP Score | Grantham Score | PolyPhen | SIFT Prediction | SIFT Score |
|-----------|------|--------|---------------|---------------|-------------------------|-------|--------------------|-----------------|------------|----------------|----------|-----------------|------------|
| rs4788099 | 16   | 1000G  | <i>APOBR</i>  | 28,414,373    | rs149271                | 0.72  | E170E              | 0.88            | 2.1        | NA             | unknown  | Tolerated       | 1          |
| rs4788099 | 16   | 1000G  | <i>APOBR</i>  | 28,415,570    | rs151174                | 0.79  | G569G              | 0.00            | -9.6       | NA             | unknown  | Tolerated       | 1          |
| rs4788099 | 16   | 1000G  | <i>APOBR</i>  | 28,415,145    | rs180743                | 0.79  | P428A              | 0.10            | 0.49       | 27             | unknown  | Tolerated       | 1          |
| rs4788099 | 16   | 1000G  | <i>APOBR</i>  | 28,415,549    | rs180744                | 0.75  | Q562Q              | 0.00            | 0.11       | NA             | unknown  | Tolerated       | 1          |
| rs4788099 | 16   | 1000G  | <i>APOBR</i>  | 28,415,948    | rs40831                 | 0.72  | A695A              | 0.00            | 0.39       | NA             | unknown  | Tolerated       | 1          |
| rs4788099 | 16   | 1000G  | <i>SH2B1</i>  | 28,790,742    | rs7498665               | 1.00  | T484A              | 1.00            | 3.1        | 58             | benign   | Tolerated       | 1          |
| rs4788099 | 16   | Hapmap | <i>ATP2A1</i> | 28,806,294    | rs6565259               | 0.70  | T226T              | 0.02            | -11.0      | NA             | unknown  | Tolerated       | 1          |

Chr., Chromosome; Position(bp) according to Build 36; allele coding based on the positive strand.

$r^2$  between body fat percentage SNP and putative coding variant

PhastCon Score ranges between 0 and 1 and describes the degree of sequence conservation among 17 vertebrate species [PMID: 16024819].

The Genomic Evolutionary Rate Profiling (GERP) score ranges from -12.3 to 6.17, with 6.17 being the most conserved [PMID: 15965027].

Grantham Score categorizes codon replacements into classes of increasing chemical dissimilarity [PMID: 4843792]

PolyPhen predicts the possible impact of an amino acid substitution on protein structure and function [PMID: 20354512]

SIFT predicts whether an amino acid substitution affects protein function based on the degree of conservation of amino acid residues in sequence alignments derived from closely related sequences [PMID: 19561590].

**Supplementary Table 16. Descriptive information of studies used in cis-eQTL analyses**

| <b>Study</b>            | <b>Tissues (n)</b>                               | <b>Genotype Platform</b>          | <b>Gene Expression Platform</b>                                                                                            | <b>Reference</b>                  |
|-------------------------|--------------------------------------------------|-----------------------------------|----------------------------------------------------------------------------------------------------------------------------|-----------------------------------|
| Bariatric Surgery Study | Omental fat (n=742) and subcutaneous fat (n=610) | Illumina 650K                     | Custom Agilent 44,000 feature microarray composed of 39,280 oligonucleotide probes                                         | PMID: 20346437                    |
| MolOBB                  | Abdominal adipose (n=54) and Gluteal fat (n=65)  | Illumina 317K                     | Affymetrix Human Genome U133 Plus 2.0 gene-expression microarrays (hgu133plus2 arrays) with 17,726 non-overlapping probes. | PMID: 22383892                    |
| Eqtl meta-analysis      | Whole blood (n=2,360)                            | Illumina HumanHap300, HumanHap370 | Illumina HumanRef-8 v2 or Illumina HumanHT-12 arrays                                                                       | PMID:24518929, 21829388, 24013639 |
| Cortical brain study    | Brain (n=193)                                    | Affymetrix Human Mapping 500K     | Illumina Human Mapping Refseq-8 Expression Beadchip                                                                        | PMID: 17982457                    |







Supplementary Table 18. Regulatory data used in body fat percentage epigenomic analysis

| ENCODE Consortium |                  |             |             |             |                 |             |             |             |                  |
|-------------------|------------------|-------------|-------------|-------------|-----------------|-------------|-------------|-------------|------------------|
| Sample            | Tissue           | DNaseI HS   | H3K4me1     | H3K27ac     | H3K4me3         | H3K9ac      | FAIRE       | H3K4me2     | TF               |
| GM12878           | Blood            | Integrative | Integrative | Integrative | Integrative (2) | Integrative | Integrative | Integrative | Integrative (75) |
| GM06990           | Blood            | Integrative | -           | -           | Integrative     | -           | -           | -           | Integrative(1)   |
| GM12193           | Blood            | -           | -           | -           | -               | -           | -           | -           | Integrative(2)   |
| GM12801           | Blood            | -           | -           | -           | -               | -           | -           | -           | Integrative(1)   |
| GM12864           | Blood            | Integrative | -           | -           | -               | -           | -           | -           | Integrative(1)   |
| GM12865           | Blood            | Integrative | -           | -           | -               | -           | -           | -           | Integrative(1)   |
| GM12872           | Blood            | -           | -           | -           | -               | -           | -           | -           | Integrative(1)   |
| GM12873           | Blood            | -           | -           | -           | -               | -           | -           | -           | Integrative(1)   |
| GM12874           | Blood            | -           | -           | -           | -               | -           | -           | -           | Integrative(1)   |
| GM12875           | Blood            | -           | -           | -           | -               | -           | -           | -           | Integrative(1)   |
| GM12891           | Blood            | Integrative | -           | -           | -               | -           | Integrative | -           | Integrative(10)  |
| GM12892           | Blood            | Integrative | -           | -           | -               | -           | Integrative | -           | Integrative(10)  |
| GM15510           | Blood            | Integrative | -           | -           | -               | -           | -           | -           | Integrative(1)   |
| GM18505           | Blood            | -           | -           | -           | -               | -           | -           | -           | Integrative(2)   |
| GM18507           | Blood            | Integrative | -           | -           | -               | -           | Integrative | -           | Integrative(1)   |
| GM18951           | Blood            | -           | -           | -           | -               | -           | -           | -           | Integrative(2)   |
| GM19099           | Blood            | -           | -           | -           | -               | -           | -           | -           | Integrative(2)   |
| GM19238           | Blood            | Integrative | -           | -           | -               | -           | -           | -           | -                |
| GM19239           | Blood            | Integrative | -           | -           | -               | -           | Integrative | -           | -                |
| GM19240           | Blood            | Integrative | -           | -           | -               | -           | -           | -           | -                |
| Astrocytes        | Brain            | Integrative | Standard    | Integrative | Integrative     | -           | Integrative | -           | Integrative (1)  |
| Cerebellum        | Brain            | Standard    | -           | -           | -               | -           | -           | -           | -                |
| Cerebrum Frontal  | Brain            | Standard    | -           | -           | -               | -           | -           | -           | -                |
| Frontal Cortex    | Brain            | Standard    | -           | -           | -               | -           | Integrative | -           | -                |
| HepG2             | Liver            | Integrative | Integrative | Integrative | Integrative (2) | Integrative | Integrative | Integrative | Integrative (61) |
| Hepatocytes       | Liver            | Integrative | -           | -           | -               | -           | -           | -           | -                |
| Huh-7             | Liver            | Integrative | -           | -           | -               | -           | -           | -           | -                |
| Pancreatic Islet  | Pancreatic Islet | Integrative | -           | -           | -               | -           | Integrative | -           | -                |

  

| Roadmap Epigenomics Project |                  |           |         |         |         |        |       |         |    |
|-----------------------------|------------------|-----------|---------|---------|---------|--------|-------|---------|----|
| Sample                      | Tissue           | DNaseI HS | H3K4me1 | H3K27ac | H3K4me3 | H3K9ac | FAIRE | H3K4me2 | TF |
| Adipose Nuclei              | Adipose          | -         | IDR     | MACS2   | IDR     | IDR    | -     | -       | -  |
| Anterior Caudate            | Brain            | -         | IDR     | MACS2   | IDR     | MACS2  | -     | -       | -  |
| Mid Frontal Lobe            | Brain            | -         | IDR     | MACS2   | IDR     | MACS2  | -     | -       | -  |
| Substantia Nigra            | Brain            | -         | IDR     | -       | IDR     | MACS2  | -     | -       | -  |
| Adult Liver                 | Liver            | -         | IDR     | -       | IDR     | IDR    | -     | -       | -  |
| Pancreatic Islet            | Pancreatic Islet | -         | MACS2   | -       | MACS2   | MACS2  | -     | -       | -  |

Method of analysis for ENCODE (integrative analysis or standard analysis) and Roadmap Epigenomics data (IDR or MAC2 alone) used in epigenomics analysis. Numbers in parentheses indicate the number of datasets when more than one is available. IDR, Irreproducible Discovery Rate; TF, Transcription Factor Binding.

Supplementary Table 19. Regulatory element overlap with variants at body fat percentage-associated loci

| SNP         | Position       | Locus  | Nearest TSS (kb) | Nearest Gene   | DNase | FAIRE | H3K4me1 | H3K27ac | H3K4me3 | H3K9ac | H3K4me2 | Transcription Factors                                                                                 | Number of Overlaps | Number of Tissues |
|-------------|----------------|--------|------------------|----------------|-------|-------|---------|---------|---------|--------|---------|-------------------------------------------------------------------------------------------------------|--------------------|-------------------|
| rs34166952  | chr1:17793822  | SEC16B | 103,798          | RP4-798P15.2   | N     |       | N       | N       |         |        |         |                                                                                                       | 3                  | 1                 |
| rs6670873   | chr1:177841685 | SEC16B | 55,935           | RP4-798P15.2   |       |       | NL      |         |         |        | FOXA1:L |                                                                                                       | 3                  | 2                 |
| rs10913469  | chr1:177913519 | SEC16B | -8,018           | SEC16B         |       |       |         | N       |         | N      |         |                                                                                                       | 3                  | 1                 |
| rs115342375 | chr2:605176    | TMEM18 | 46,973           | AC093326.3     | N     | LB    |         |         |         |        |         |                                                                                                       | 4                  | 3                 |
| rs6548238   | chr2:634905    | TMEM18 | 40,870           | TMEM18         | NL    |       | L       |         |         |        |         |                                                                                                       | 3                  | 2                 |
| rs35142762  | chr2:636790    | TMEM18 | 38,985           | TMEM18         | NLB   |       | AN      | N       | AN      | ANI    |         |                                                                                                       | 17                 | 5                 |
| rs35796073  | chr2:636819    | TMEM18 | 38,956           | TMEM18         | NL    |       | AN      | N       | AN      | ANI    |         |                                                                                                       | 16                 | 4                 |
| rs6548240   | chr2:636929    | TMEM18 | 38,846           | TMEM18         | NILB  |       | AN      | N       | AN      | ANI    |         |                                                                                                       | 22                 | 5                 |
| rs13387939  | chr2:637498    | TMEM18 | 38,277           | TMEM18         | N     |       | A       |         |         | AN     |         |                                                                                                       | 4                  | 2                 |
| rs13396119  | chr2:637508    | TMEM18 | 38,267           | TMEM18         | NB    |       | A       |         |         | AN     |         |                                                                                                       | 5                  | 3                 |
| rs13388043  | chr2:637597    | TMEM18 | 38,178           | TMEM18         | NB    |       |         |         |         | AN     |         |                                                                                                       | 4                  | 3                 |
| rs35913461  | chr2:653575    | TMEM18 | 22,200           | TMEM18         | L     |       | L       |         |         |        |         |                                                                                                       | 2                  | 1                 |
| rs35628463  | chr2:653581    | TMEM18 | 22,194           | TMEM18         | L     |       | L       |         |         |        |         |                                                                                                       | 2                  | 1                 |
| rs6713419   | chr2:165508300 | GRB14  | -29,942          | GRB14          |       |       | L       |         |         |        | MAFK:L  |                                                                                                       | 2                  | 1                 |
| rs10184004  | chr2:165508389 | GRB14  | -30,031          | GRB14          |       |       | L       |         |         |        | MAFK:L  |                                                                                                       | 2                  | 1                 |
| rs10195252  | chr2:165513091 | GRB14  | 31,196           | SNORA70F       |       |       | NL      | N       |         |        |         |                                                                                                       | 3                  | 2                 |
| rs6752978   | chr2:165552942 | GRB14  | -8,655           | SNORA70F       |       |       | L       | AL      | L       | L      |         |                                                                                                       | 5                  | 2                 |
| rs12692737  | chr2:165554309 | GRB14  | -10,022          | SNORA70F       | L     | NIB   | IL      | AL      |         |        | L       | CTCF:BLN RAD21:L FOXA1:L                                                                              | 25                 | 5                 |
| rs9653282   | chr2:165554658 | GRB14  | -10,371          | SNORA70F       |       | I     | IL      | AL      |         |        | L       |                                                                                                       | 6                  | 3                 |
| rs7609045   | chr2:165555207 | GRB14  | -10,920          | SNORA70F       |       |       | IL      | AL      |         |        | L       |                                                                                                       | 5                  | 3                 |
| rs2198550   | chr2:165556760 | GRB14  | -12,473          | SNORA70F       |       |       | IL      | L       |         |        |         |                                                                                                       | 3                  | 2                 |
| rs6712203   | chr2:165557318 | GRB14  | -13,031          | SNORA70F       |       | I     | L       | L       |         |        |         |                                                                                                       | 3                  | 2                 |
| rs13423088  | chr2:227026864 | IRS1   | 23,223           | AC068138.1     |       |       | L       | AL      |         |        |         |                                                                                                       | 3                  | 2                 |
| rs2943651   | chr2:227047414 | IRS1   | 2,673            | AC068138.1     | L     |       | L       | L       |         |        |         |                                                                                                       | 3                  | 1                 |
| rs2943653   | chr2:227047771 | IRS1   | 2,316            | AC068138.1     |       |       | L       | AL      |         |        |         |                                                                                                       | 3                  | 2                 |
| rs2943635   | chr2:227077377 | IRS1   | -27,290          | AC068138.1     |       |       | NL      | AN      |         |        |         |                                                                                                       | 4                  | 3                 |
| rs2943656   | chr2:227121918 | IRS1   | -71,831          | AC068138.1     |       |       | N       | N       |         |        |         |                                                                                                       | 2                  | 1                 |
| rs1515110   | chr2:227122216 | IRS1   | -72,129          | AC068138.1     |       | I     | N       | N       |         |        |         |                                                                                                       | 3                  | 2                 |
| rs2673135   | chr2:227151596 | IRS1   | -101,509         | AC068138.1     |       |       | L       |         |         |        |         | FOXA1:L                                                                                               | 2                  | 1                 |
| rs2673136   | chr2:227164653 | IRS1   | -114,566         | AC068138.1     |       |       |         |         |         |        |         | MAFK:L MAFF:L                                                                                         | 3                  | 1                 |
| rs2713556   | chr2:227172598 | IRS1   | -122,511         | AC068138.1     |       |       | IL      |         | I       |        | L       |                                                                                                       | 4                  | 2                 |
| rs35251159  | chr13:80975547 | SPRY2  | -31,878          | RNU6-61        |       | B     |         |         |         |        |         | TBP:B                                                                                                 | 2                  | 1                 |
| rs9545447   | chr13:81078769 | SPRY2  | -135,100         | RNU6-61        |       |       |         | A       | A       |        |         |                                                                                                       | 2                  | 1                 |
| rs149299    | chr16:28485141 | SH2B1  | -3,273           | NPIPL1         |       | B     |         |         |         |        |         | EBF:B EBF1C8:B                                                                                        | 7                  | 1                 |
| rs27741     | chr16:28504181 | SH2B1  | -558             | CLN3           |       | I     | B       | B       | ALB     | B      | LB      |                                                                                                       | 10                 | 4                 |
| rs149271    | chr16:28506872 | SH2B1  | -6               | CLN3           |       | N     | LB      | B       | AB      | NB     | B       |                                                                                                       | 9                  | 4                 |
| rs26528     | chr16:28517709 | SH2B1  | 446              | IL27           |       |       | ALB     |         | ALB     |        | LB      |                                                                                                       | 10                 | 3                 |
| rs153109    | chr16:28519096 | SH2B1  | -941             | IL27           |       | B     | ALB     | B       | ALB     |        | LB      |                                                                                                       | 12                 | 3                 |
| rs62034319  | chr16:28532188 | SH2B1  | -14,033          | IL27           |       |       | L       |         |         |        | L       | TR4:L                                                                                                 | 3                  | 1                 |
| rs4788085   | chr16:28535003 | SH2B1  | 15,326           | NUPR1          |       |       | ALB     | A       |         |        | B       |                                                                                                       | 5                  | 3                 |
| rs28772958  | chr16:28535305 | SH2B1  | 15,024           | NUPR1          |       |       | ALB     | A       | L       | L      |         |                                                                                                       | 6                  | 3                 |
| rs62034323  | chr16:28536473 | SH2B1  | 13,856           | NUPR1          |       |       | ALB     | AL      | L       | L      |         |                                                                                                       | 7                  | 3                 |
| rs62034324  | chr16:28536762 | SH2B1  | 13,567           | NUPR1          |       |       | AL      | AL      | L       | L      | L       |                                                                                                       | 7                  | 2                 |
| rs2106480   | chr16:28537971 | SH2B1  | 12,358           | NUPR1          | L     |       | AL      | AL      | L       | L      | L       | CEBPb:L FOXA2:L USF1:L cJUN:L RXRA:L HNF4a:L FOXA1:L SP1:L HDAC2:L P300:L HNF4g:L                     | 25                 | 2                 |
| rs62034325  | chr16:28538640 | SH2B1  | 11,689           | NUPR1          |       |       | AL      | L       | L       | L      | L       |                                                                                                       | 8                  | 2                 |
| rs62034326  | chr16:28539293 | SH2B1  | 11,036           | NUPR1          |       |       | L       | L       |         |        | L       |                                                                                                       | 4                  | 1                 |
| rs4788084   | chr16:28539848 | SH2B1  | 10,481           | NUPR1          | L     | L     | L       | L       |         | L      | L       | EBF:B                                                                                                 | 9                  | 2                 |
| rs12446550  | chr16:28543381 | SH2B1  | 6,948            | NUPR1          |       |       | ALB     | AL      | L       | L      | L       |                                                                                                       | 9                  | 3                 |
| rs4788083   | chr16:28545449 | SH2B1  | 4,880            | NUPR1          |       |       | AL      | A       |         |        |         |                                                                                                       | 5                  | 2                 |
| rs3785354   | chr16:28550667 | SH2B1  | -172             | NUPR1          |       | N     | ANL     | ANL     | ANL     | ANL    | L       |                                                                                                       | 23                 | 3                 |
| rs1074631   | chr16:28554108 | SH2B1  | -3,613           | NUPR1          |       |       | LB      | N       | L       | N      | L       | EBF:B                                                                                                 | 8                  | 3                 |
| rs4787457   | chr16:28555400 | SH2B1  | -4,905           | NUPR1          |       |       | L       |         |         |        | L       |                                                                                                       | 2                  | 1                 |
| rs7191618   | chr16:28556667 | SH2B1  | 421              | CCDC101        | NL    | B     | ANLB    | ANLB    | ANLB    | ANLB   | ANLB    | HEY1:L                                                                                                | 40                 | 5                 |
| rs3859172   | chr16:28566158 | SH2B1  | 912              | CCDC101        |       | B     | ANLB    | NLB     | ANLB    | ANLB   | ANLB    | LB                                                                                                    | 36                 | 5                 |
| rs2077031   | chr16:28603168 | SH2B1  | 4,633            | SULT1A2        |       | N     |         |         |         |        |         |                                                                                                       | 2                  | 1                 |
| rs113208333 | chr16:28606160 | SH2B1  | 1,641            | SULT1A2        |       |       | L       | L       |         |        | L       |                                                                                                       | 3                  | 1                 |
| rs4115668   | chr16:28607532 | SH2B1  | 269              | SULT1A2        | NL    |       | L       | L       | AL      | L      | L       |                                                                                                       | 10                 | 3                 |
| rs762633    | chr16:28608341 | SH2B1  | 27               | SULT1A2        | NIL   | L     | L       | L       | AL      | NL     | L       | TBP:L HEY1:L HDAC2:L TAF1:L ELF1:L POL2:L                                                             | 22                 | 4                 |
| rs35175818  | chr16:28608746 | SH2B1  | -316             | SULT1A2        | NL    |       | L       | L       | AL      | L      | L       |                                                                                                       | 12                 | 3                 |
| rs4149398   | chr16:28608938 | SH2B1  | -508             | SULT1A2        |       | NIB   | L       | L       | AL      | L      | L       |                                                                                                       | 11                 | 5                 |
| rs62031562  | chr16:28609329 | SH2B1  | -899             | SULT1A2        | LB    | L     | L       | L       | AL      | L      | L       | HEY1:L HNF4g:L FOXA1:L POL2:L                                                                         | 15                 | 3                 |
| rs4788095   | chr16:28831359 | SH2B1  | 1,995            | RP11-1348G14.5 |       |       | L       | L       |         |        |         | POL2:L                                                                                                | 4                  | 1                 |
| rs72793809  | chr16:28832382 | SH2B1  | 972              | RP11-1348G14.5 |       |       | NL      | L       |         |        | AL      | LB                                                                                                    | 8                  | 4                 |
| rs62036620  | chr16:28833097 | SH2B1  | 257              | RP11-1348G14.5 |       |       | ANL     | NLB     | NLB     | ANLB   | LB      |                                                                                                       | 17                 | 4                 |
| rs62036621  | chr16:28833299 | SH2B1  | 55               | RP11-1348G14.5 |       |       | ANL     | NLB     | NLB     | ANLB   | LB      |                                                                                                       | 20                 | 4                 |
| rs4451951   | chr16:28836205 | SH2B1  | 1,633            | ATXN2L         |       | B     | ANLB    | ANLB    | ANLB    | ANLB   | LB      |                                                                                                       | 31                 | 5                 |
| rs62036622  | chr16:28837203 | SH2B1  | 2,631            | ATXN2L         |       |       | ANLB    | LB      | NLB     | ANLB   | LB      |                                                                                                       | 19                 | 5                 |
| rs8049439   | chr16:28837515 | SH2B1  | 2,943            | ATXN2L         |       |       | ANLB    | L       | NLB     | ANLB   | LB      | CTCF:LN                                                                                               | 19                 | 5                 |
| rs8062405   | chr16:28837906 | SH2B1  | 3,334            | ATXN2L         |       |       | ANLB    | L       | NLB     | ANLB   | LB      |                                                                                                       | 16                 | 5                 |
| rs61737565  | chr16:28855522 | SH2B1  | 2,207            | TUFM           |       |       | NB      |         | N       | A      | B       |                                                                                                       | 5                  | 3                 |
| rs4788099   | chr16:28855727 | SH2B1  | 2,002            | TUFM           |       |       | NB      |         | NB      | AL     | B       |                                                                                                       | 7                  | 4                 |
| rs7187776   | chr16:28857645 | SH2B1  | 84               | TUFM           |       | NB    | ILB     | L       | ANLB    | ANLB   | ANLB    | TBP:BL TAF1:B PU1:B ELF1:BL SIN3ak:L POL2:BL GABP:BL YY1:B SP1:B HEY1:L NFkb:B EGR1:B GRP20:L RXF5n:L | 74                 | 5                 |
| rs4788102   | chr16:28873398 | SH2B1  | -726             | SH2B1          |       | L     | B       | ANB     | B       | ANB    | B       |                                                                                                       | 11                 | 4                 |

|            |                |              |         |               |      |   |      |      |       |       |    |         |         |         |         |         |         |        |        |         |        |         |        |        |    |   |
|------------|----------------|--------------|---------|---------------|------|---|------|------|-------|-------|----|---------|---------|---------|---------|---------|---------|--------|--------|---------|--------|---------|--------|--------|----|---|
| rs62037367 | chr16:28874547 | SH2B1        | 114     | RP11-22P6.2   | NL   | B | A    | ANLB | ANILB | ANILB | LB | OCT2:B  | POUF1:B | POL2:B  | 37      | 5       |         |        |        |         |        |         |        |        |    |   |
| rs7198606  | chr16:28875122 | SH2B1        | -3      | SH2B1         | NILB | B | A    | ANLB | ANILB | ANILB | LB | TBP:L   | TAF1:BL | NRF1:B  | ELF1:BL | POL2:BL | GABP:L  | 60     | 5      |         |        |         |        |        |    |   |
| rs11864750 | chr16:28875204 | SH2B1        | 6       | SH2B1         | NL   | B | A    | ANLB | ANILB | ANILB | LB | TBP:L   | TAF1:L  | NRF1:B  | ELF1:BL | POL2:BL | GABP:BL | 44     | 5      |         |        |         |        |        |    |   |
| rs7193733  | chr16:28875482 | SH2B1        | 187     | SH2B1         | NLB  |   |      | ANLB | ANLB  | ANLB  | LB |         |         |         |         |         |         | 36     | 5      |         |        |         |        |        |    |   |
| rs11864107 | chr16:28885931 | SH2B1        | -3,794  | ATP2A1        | N    |   |      |      |       |       |    |         | BATF:B  |         |         |         |         | 3      | 2      |         |        |         |        |        |    |   |
| rs3888190  | chr16:28889486 | SH2B1        | -239    | ATP2A1        | NL   |   | B    |      |       |       |    | B       |         |         |         |         |         | 5      | 3      |         |        |         |        |        |    |   |
| rs62037371 | chr16:28890131 | SH2B1        | 323     | ATP2A1        | N    |   | NLB  |      | B     | AB    | B  | POL2:L  |         |         |         |         |         | 10     | 4      |         |        |         |        |        |    |   |
| rs8055138  | chr16:28891465 | SH2B1        | 92      | ATP2A1        | N    | B | ANLB | L    | ANB   | ANB   | B  | SP1:B   |         |         |         |         |         | 23     | 4      |         |        |         |        |        |    |   |
| rs7185232  | chr16:28933468 | SH2B1        | 3,049   | RABEP2        | B    |   | L    | L    |       |       |    |         |         |         |         |         |         | 3      | 2      |         |        |         |        |        |    |   |
| rs9937521  | chr16:53799296 | FTO          | 61,203  | FTO           |      |   | L    | L    |       |       |    |         |         |         |         |         |         | 2      | 1      |         |        |         |        |        |    |   |
| rs28562191 | chr16:53799303 | FTO          | 61,210  | FTO           |      |   | L    | L    |       |       |    |         |         |         |         |         |         | 2      | 1      |         |        |         |        |        |    |   |
| rs9937053  | chr16:53799507 | FTO          | 61,414  | FTO           |      |   | L    | L    | L     | L     |    |         |         |         |         |         |         | 4      | 1      |         |        |         |        |        |    |   |
| rs9937354  | chr16:53799847 | FTO          | 61,754  | FTO           |      |   | L    | L    | L     | L     | L  |         |         |         |         |         |         | 4      | 1      |         |        |         |        |        |    |   |
| rs9928094  | chr16:53799905 | FTO          | 61,812  | FTO           |      |   | NL   | L    | L     | L     | L  |         |         |         |         |         |         | 5      | 2      |         |        |         |        |        |    |   |
| rs9930333  | chr16:53799977 | FTO          | 61,884  | FTO           |      |   | NL   | L    | L     | L     | L  |         |         |         |         |         |         | 5      | 2      |         |        |         |        |        |    |   |
| rs9930397  | chr16:53799985 | FTO          | 61,892  | FTO           |      |   | NL   | L    | L     | L     | L  |         |         |         |         |         |         | 5      | 2      |         |        |         |        |        |    |   |
| rs9940278  | chr16:53800200 | FTO          | 62,107  | FTO           |      |   | NL   | L    | L     | L     | L  |         |         |         |         |         |         | 5      | 2      |         |        |         |        |        |    |   |
| rs9939973  | chr16:53800568 | FTO          | 62,475  | FTO           | L    |   | NL   | NL   | L     | L     |    | USF1:L  | USF:L   | RXRA:L  | HNF4a:L | MAFK:L  | JUND:L  | 17     | 2      |         |        |         |        |        |    |   |
| rs9940646  | chr16:53800629 | FTO          | 62,536  | FTO           | L    | N | NL   | NL   | L     | L     |    | P300:L  | TCF4:L  | FOSL2:L | MAFK:L  | JUND:L  | USF:L   | RXRA:L | P300:L | HNF4a:L | TCF4:L | FOSL2:L | JUND:L | TCF4:L | 16 | 2 |
| rs9940128  | chr16:53800754 | FTO          | 62,661  | FTO           | NI   |   | NL   | NL   | L     | L     |    | JUND:L  | TCF4:L  |         |         |         |         | 10     | 3      |         |        |         |        |        |    |   |
| rs1421085  | chr16:53800954 | FTO          | 62,861  | FTO           |      |   | NL   | NL   | L     | L     |    |         |         |         |         |         |         | 6      | 2      |         |        |         |        |        |    |   |
| rs1421086  | chr16:53801343 | FTO          | 63,250  | FTO           |      |   | NL   | NL   | L     | L     |    |         |         |         |         |         |         | 6      | 2      |         |        |         |        |        |    |   |
| rs9923147  | chr16:53801549 | FTO          | 63,456  | FTO           |      |   | NL   | L    | L     | L     |    |         |         |         |         |         |         | 4      | 2      |         |        |         |        |        |    |   |
| rs9923544  | chr16:53801985 | FTO          | 63,892  | FTO           |      |   | NL   | NL   |       | N     |    |         |         |         |         |         |         | 5      | 2      |         |        |         |        |        |    |   |
| rs11642015 | chr16:53802494 | FTO          | 64,401  | FTO           |      |   | NL   | NL   |       |       |    | JUND:L  | BATF:B  |         |         |         |         | 7      | 3      |         |        |         |        |        |    |   |
| rs1558901  | chr16:53803187 | FTO          | 65,094  | FTO           |      |   | NIL  | NL   |       |       |    |         |         |         |         |         |         | 5      | 3      |         |        |         |        |        |    |   |
| rs62048402 | chr16:53803223 | FTO          | 65,130  | FTO           |      |   | NIL  | NL   |       |       |    |         |         |         |         |         |         | 5      | 3      |         |        |         |        |        |    |   |
| rs1558902  | chr16:53803574 | FTO          | 65,481  | FTO           |      |   | NL   | L    |       |       |    |         |         |         |         |         |         | 3      | 2      |         |        |         |        |        |    |   |
| rs11075985 | chr16:53805207 | FTO          | 67,114  | FTO           |      |   | N    |      |       |       |    |         |         |         |         |         |         | 3      | 1      |         |        |         |        |        |    |   |
| rs60694641 | chr16:53806453 | FTO          | 68,360  | FTO           | N    |   | NL   | A    |       | N     |    |         |         |         |         |         |         | 6      | 3      |         |        |         |        |        |    |   |
| rs55872725 | chr16:53809123 | FTO          | 71,030  | FTO           |      |   | NL   | A    |       |       | L  | PU1:B   |         |         |         |         |         | 8      | 4      |         |        |         |        |        |    |   |
| rs1121980  | chr16:53809247 | FTO          | 71,154  | FTO           |      |   | NL   | A    |       |       | L  | PU1:B   |         |         |         |         |         | 8      | 4      |         |        |         |        |        |    |   |
| rs7187250  | chr16:53810546 | FTO          | 72,453  | FTO           |      |   | NIL  | AN   |       |       | L  |         |         |         |         |         |         | 7      | 4      |         |        |         |        |        |    |   |
| rs7193144  | chr16:53810686 | FTO          | 72,593  | FTO           | I    |   | NIL  | AN   |       |       | L  |         |         |         |         |         |         | 8      | 4      |         |        |         |        |        |    |   |
| rs62033399 | chr16:53810943 | FTO          | 72,850  | FTO           |      |   | NIL  | AN   |       |       | L  |         |         |         |         |         |         | 7      | 4      |         |        |         |        |        |    |   |
| rs62033400 | chr16:53811788 | FTO          | 73,695  | FTO           | N    |   | IL   | A    |       |       |    | MAFK:L  |         |         |         |         |         | 7      | 4      |         |        |         |        |        |    |   |
| rs8063057  | chr16:53812433 | FTO          | 74,340  | FTO           |      |   | L    | A    |       | N     |    |         |         |         |         |         |         | 4      | 3      |         |        |         |        |        |    |   |
| rs17817449 | chr16:53813367 | FTO          | 75,274  | FTO           | N    |   | L    |      |       |       |    |         |         |         |         |         |         | 3      | 2      |         |        |         |        |        |    |   |
| rs8043757  | chr16:53813450 | FTO          | 75,357  | FTO           |      |   | L    |      |       |       |    |         |         |         |         |         |         | 2      | 1      |         |        |         |        |        |    |   |
| rs9972653  | chr16:53814363 | FTO          | 76,270  | FTO           |      |   | NL   | N    |       |       |    |         |         |         |         |         |         | 3      | 2      |         |        |         |        |        |    |   |
| rs17817497 | chr16:53815435 | FTO          | 77,342  | FTO           |      |   | NIL  |      |       |       |    | cJUN:L  |         |         |         |         |         | 4      | 3      |         |        |         |        |        |    |   |
| rs7202116  | chr16:53821615 | FTO          | 83,522  | FTO           |      |   |      |      |       |       |    | MAFK:L  | MAFF:L  |         |         |         |         | 2      | 1      |         |        |         |        |        |    |   |
| rs79994966 | chr16:53823727 | FTO          | 85,634  | FTO           | N    |   | N    |      |       |       |    |         |         |         |         |         |         | 2      | 1      |         |        |         |        |        |    |   |
| rs12149574 | chr16:53840525 | FTO          | -80,303 | FTO           |      |   | NI   |      |       | N     |    |         |         |         |         |         |         | 6      | 2      |         |        |         |        |        |    |   |
| rs12149832 | chr16:53842908 | FTO          | -77,920 | FTO           |      |   | NI   | N    |       | N     |    |         |         |         |         |         |         | 6      | 2      |         |        |         |        |        |    |   |
| rs9909861  | chr17:47079416 | IGF2BP1      | 4,292   | IGF2BP1       | NL   |   | NL   | N    | L     | L     |    |         |         |         |         |         |         | 7      | 2      |         |        |         |        |        |    |   |
| rs12945020 | chr17:47082775 | IGF2BP1      | 7,651   | IGF2BP1       | IL   | L | L    | L    | N     | L     | L  | FOXA1:L |         |         |         |         |         | 10     | 3      |         |        |         |        |        |    |   |
| rs35051752 | chr17:47089908 | IGF2BP1      | 1,179   | RP11-501C14.6 |      |   | NL   | L    | L     | L     | L  |         |         |         |         |         |         | 7      | 2      |         |        |         |        |        |    |   |
| rs11079849 | chr17:47090785 | IGF2BP1      | 302     | RP11-501C14.6 | NLB  |   | NL   | L    | L     | L     | L  |         |         |         |         |         |         | 11     | 3      |         |        |         |        |        |    |   |
| rs9906710  | chr17:47091283 | IGF2BP1      | -196    | RP11-501C14.6 | N    |   | NL   | L    | L     | L     | L  | CHD2:L  |         |         |         |         |         | 9      | 2      |         |        |         |        |        |    |   |
| rs9906944  | chr17:47091420 | IGF2BP1      | -333    | RP11-501C14.6 | NLB  |   | NL   | L    | L     | L     | L  |         |         |         |         |         |         | 8      | 3      |         |        |         |        |        |    |   |
| rs4794018  | chr17:47093398 | IGF2BP1      | -2,311  | RP11-501C14.6 | L    |   | NL   |      |       |       |    |         |         |         |         |         |         | 3      | 2      |         |        |         |        |        |    |   |
| rs9902512  | chr17:47094274 | IGF2BP1      | -3,187  | RP11-501C14.6 | NIL  |   | NL   |      |       |       |    |         |         |         |         |         |         | 8      | 3      |         |        |         |        |        |    |   |
| rs8068981  | chr17:47122525 | IGF2BP1      | 8,812   | U6            |      |   | N    | N    |       |       |    |         |         |         |         |         |         | 2      | 1      |         |        |         |        |        |    |   |
| rs1523136  | chr17:47144532 | IGF2BP1      | 30,819  | U6            | B    |   | L    | L    | L     | L     | L  |         |         |         |         |         |         | 6      | 2      |         |        |         |        |        |    |   |
| rs940088   | chr17:47145848 | IGF2BP1      | 32,135  | U6            |      |   | NL   | L    | L     | L     | L  |         |         |         |         |         |         | 7      | 2      |         |        |         |        |        |    |   |
| rs35693910 | chr18:57913965 | MC4R         | 83,166  | U4            |      |   | B    | B    | B     |       | B  |         |         |         |         |         |         | 7      | 1      |         |        |         |        |        |    |   |
| rs7258722  | chr19:18808915 | CRTC1        | 14,491  | CRTC1         | N    | B | B    |      |       | N     |    |         |         |         |         |         |         | 4      | 2      |         |        |         |        |        |    |   |
| rs4808844  | chr19:18811966 | CRTC1        | 17,542  | CRTC1         | NIB  | B | ANLB | N    | ANB   | ANIB  | B  | POL2:B  |         |         |         |         |         | 43     | 5      |         |        |         |        |        |    |   |
| rs4808845  | chr19:18812024 | CRTC1        | 17,600  | CRTC1         | NIB  | B | ANLB | N    | ANB   | ANIB  | B  | POL2:B  |         |         |         |         |         | 41     | 5      |         |        |         |        |        |    |   |
| rs757318   | chr19:18820308 | CRTC1        | 25,884  | CRTC1         | NB   |   | A    |      |       |       |    |         |         |         |         |         |         | 5      | 3      |         |        |         |        |        |    |   |
| rs9304955  | chr19:18824870 | CRTC1        | 30,446  | CRTC1         | N    |   | L    | L    | L     |       | L  |         |         |         |         |         |         | 7      | 2      |         |        |         |        |        |    |   |
| rs11880870 | chr19:18830704 | CRTC1        | 36,280  | CRTC1         | N    |   | N    |      |       | N     |    |         |         |         |         |         |         | 5      | 1      |         |        |         |        |        |    |   |
| rs10404726 | chr19:18834514 | CRTC1        | 40,090  | CRTC1         | N    |   |      | N    |       |       |    |         |         |         |         |         |         | 2      | 1      |         |        |         |        |        |    |   |
| rs11668500 | chr19:18836674 | CRTC1        | 42,250  | CRTC1         | N    |   | N    |      |       |       |    |         |         |         |         |         |         | 3      | 1      |         |        |         |        |        |    |   |
| rs84473    | chr22:38557326 | PLA2G6-PICK1 | 6,758   | PLA2G6        |      | B | B    |      |       |       |    | ELF1:L  |         |         |         |         |         | 4      | 2      |         |        |         |        |        |    |   |
| rs132971   | chr22:38561911 | PLA2G6-PICK1 | 2,173   | PLA2G6        |      |   | L    |      |       | L     | L  |         |         |         |         |         |         | 4      | 1      |         |        |         |        |        |    |   |
| rs132985   | chr22:38563471 | PLA2G6-PICK1 | 613     | PLA2G6        |      |   | ANLB |      |       |       | L  |         |         |         |         |         |         | 4      | 3      |         |        |         |        |        |    |   |
| rs738320   | chr22:38568715 | PLA2G6-PICK1 | -4,631  | PLA2G6        | N    |   | ANLB | AN   |       | NL    | L  |         |         |         |         |         |         | 18     | 4      |         |        |         |        |        |    |   |
| rs738322   | chr22:38569006 | PLA2G6-PICK1 | -4,922  | PLA2G6        | NIL  | L | ANLB | N    |       | NL    | L  | CEBPb:L | JUND:L  |         |         |         |         | 26     | 5      |         |        |         |        |        |    |   |
| rs4379     | chr22:38569171 | PLA2G6-PICK1 | -5,087  | PLA2G6        | N    |   | ANLB | AN   |       | NL    | L  |         |         |         |         |         |         | 18     | 4      |         |        |         |        |        |    |   |
| rs133009   | chr22:38569653 | PLA2G6-PICK1 | -5,569  | PLA2G6        |      |   | ANLB | AN   |       | NL    | L  |         |         |         |         |         |         | 13     | 4      |         |        |         |        |        |    |   |
| rs133012   | chr22:38570721 | PLA2G6-PICK1 | -6,637  | PLA2G6        |      |   | AN   |      |       | A     |    |         |         |         |         |         |         | 3      | 2      |         |        |         |        |        |    |   |
| rs4381     | chr22:38570791 | PLA2G6-PICK1 | -6,707  | PLA2G6        |      |   | AN   |      |       | A     |    |         |         |         |         |         |         | 3      | 2      |         |        |         |        |        |    |   |
| rs4382     | chr22:38570842 | PLA2G6-PICK1 | -6,758  | PLA2G6        |      |   | AN   |      |       | A     |    |         |         |         |         |         |         | 3      | 2      |         |        |         |        |        |    |   |
| rs133014   | chr22:38571087 | PLA2G6-PICK1 | 6,668   | PLA2G6        |      | B | AN   |      |       | A     |    |         |         |         |         |         |         | 4      | 3      |         |        |         |        |        |    |   |
| rs75387    | chr22:38572057 | PLA2G6-PICK1 | 5,698   | PLA2G6        |      | B | ANLB | ANB  | B     | ANB   | B  |         |         |         |         |         |         | 19     | 4      |         |        |         |        |        |    |   |

|            |                |              |        |        |     |   |      |      |       |       |    |                                                                                                                        |    |   |
|------------|----------------|--------------|--------|--------|-----|---|------|------|-------|-------|----|------------------------------------------------------------------------------------------------------------------------|----|---|
| rs4384     | chr22:38572440 | PLA2G6-PICK1 | 5,315  | PLA2G6 | NB  | B | ANLB | ANB  | B     | ANB   | B  | EBF:B USF1:B EBF1C8:B PAX5:B BCL11a:B IRF4:B<br>POL2:B NFKb:B SP1:B TCF12:B NFKb:B P300:B<br>NFKB:B IRF4m17:B ZBTB33:B | 50 | 4 |
| rs133015   | chr22:38572526 | PLA2G6-PICK1 | 5,229  | PLA2G6 | NB  | B | ANLB | ANB  | B     | ANB   | B  | EBF:B NFKb:B EBF1C8:B IRF4m17:B PAX5:B<br>ZBTB33:B IRF4:B POL2:B NFKb:B                                                | 37 | 4 |
| rs133016   | chr22:38572582 | PLA2G6-PICK1 | 5,173  | PLA2G6 | B   | B | ANLB | ANB  | B     | ANB   | B  | EBF:B EBF1C8:B IRF4m17:B IRF4:B                                                                                        | 27 | 4 |
| rs133017   | chr22:38572637 | PLA2G6-PICK1 | 5,118  | PLA2G6 | I   | B | ANLB | ANB  | B     | ANB   | B  | EBF:B EBF1C8:B IRF4m17:B IRF4:B                                                                                        | 26 | 5 |
| rs133018   | chr22:38572761 | PLA2G6-PICK1 | 4,994  | PLA2G6 | B   | B | ANLB | ANB  | B     | AB    | B  |                                                                                                                        | 18 | 4 |
| rs133019   | chr22:38573035 | PLA2G6-PICK1 | 4,720  | PLA2G6 |     |   | ANLB | ANLB | B     | AB    | LB |                                                                                                                        | 18 | 4 |
| rs4385     | chr22:38573229 | PLA2G6-PICK1 | 4,526  | PLA2G6 | B   | B | ANLB | ANLB | B     | AB    | LB |                                                                                                                        | 23 | 4 |
| rs133021   | chr22:38573338 | PLA2G6-PICK1 | 4,417  | PLA2G6 |     | B | ANLB | ANLB | B     | AB    | LB |                                                                                                                        | 18 | 4 |
| rs133024   | chr22:38574066 | PLA2G6-PICK1 | 3,689  | PLA2G6 | N   | L | ANLB | ANLB | B     | ANB   | LB | USF1:L SIN3ak:L                                                                                                        | 24 | 4 |
| rs2277844  | chr22:38577515 | PLA2G6-PICK1 | 240    | PLA2G6 | B   | B | ANLB | ANLB | ANILB | ANILB | LB |                                                                                                                        | 36 | 5 |
| rs5750558  | chr22:38582497 | PLA2G6-PICK1 | -4,660 | PLA2G6 |     |   | L    | A    |       |       | L  |                                                                                                                        | 3  | 2 |
| rs2413505  | chr22:38592967 | PLA2G6-PICK1 | -4,921 | MAFF   |     |   | L    |      |       |       | L  |                                                                                                                        | 2  | 1 |
| rs5756968  | chr22:38595240 | PLA2G6-PICK1 | -2,648 | MAFF   |     | B | LB   | A    | B     |       | B  |                                                                                                                        | 8  | 3 |
| rs5750561  | chr22:38595260 | PLA2G6-PICK1 | -2,628 | MAFF   |     | B | LB   | A    | B     |       | B  |                                                                                                                        | 8  | 3 |
| rs3761445  | chr22:38595411 | PLA2G6-PICK1 | -2,477 | MAFF   | B   | B | LB   | A    | B     |       | B  | SRF:B POL2:B YY1:B OCT2:B SP1:B POUF1:B<br>POU2:B OCT2_B                                                               | 30 | 3 |
| rs4374456  | chr22:38597377 | PLA2G6-PICK1 | -511   | MAFF   | N   | B | NL   | ANL  | ANLB  | ANILB | LB |                                                                                                                        | 24 | 5 |
| rs4608623  | chr22:38597378 | PLA2G6-PICK1 | -510   | MAFF   | N   | B | NL   | ANL  | ANLB  | ANILB | LB |                                                                                                                        | 24 | 5 |
| rs2267372  | chr22:38598234 | PLA2G6-PICK1 | 296    | MAFF   | N   | B | B    | ANLB | ANLB  | ANILB | LB | TAF1:L POL2:B                                                                                                          | 34 | 5 |
| rs4821764  | chr22:38599364 | PLA2G6-PICK1 | 338    | MAFF   | NLB | B | ANLB | ANLB | ANILB | ANILB | LB | POL2:BL                                                                                                                | 49 | 5 |
| rs4820323  | chr22:38599767 | PLA2G6-PICK1 | 741    | MAFF   |     |   | ANLB | ANLB | ANILB | ANLB  | LB | HNF4a:L                                                                                                                | 28 | 5 |
| rs4820324  | chr22:38599857 | PLA2G6-PICK1 | 831    | MAFF   |     |   | ANLB | ANLB | ANILB | ANILB | LB | HNF4a:L                                                                                                                | 29 | 5 |
| rs4820325  | chr22:38599978 | PLA2G6-PICK1 | 952    | MAFF   | N   |   | ANLB | ANB  | ANLB  | ANILB | LB |                                                                                                                        | 28 | 5 |
| rs2267373  | chr22:38600542 | PLA2G6-PICK1 | 1,516  | MAFF   | N   | B | ANLB | ANB  | ANLB  | AB    | LB |                                                                                                                        | 24 | 4 |
| rs2267374  | chr22:38600595 | PLA2G6-PICK1 | 1,569  | MAFF   | N   | B | ANLB | ANB  | ANLB  | AB    | LB |                                                                                                                        | 24 | 4 |
| rs2267375  | chr22:38601231 | PLA2G6-PICK1 | 2,205  | MAFF   | N   | B | ANLB | ANB  | ANB   | ANB   | LB |                                                                                                                        | 26 | 4 |
| rs11914181 | chr22:38602140 | PLA2G6-PICK1 | 3,114  | MAFF   | N   |   | ANLB | AN   | AN    | A     |    |                                                                                                                        | 14 | 4 |
| rs8139952  | chr22:38606989 | PLA2G6-PICK1 | -2,552 | MAFF   |     |   | AB   | A    |       |       |    |                                                                                                                        | 3  | 2 |
| rs2235264  | chr22:38609950 | PLA2G6-PICK1 | 409    | MAFF   | NB  | B | ANLB | NB   | ANB   | N     | B  |                                                                                                                        | 21 | 4 |
| rs9610915  | chr22:38611080 | PLA2G6-PICK1 | 1,539  | MAFF   | N   | B | ANLB | NB   | ANB   |       | B  |                                                                                                                        | 18 | 4 |

Variants in linkage disequilibrium ( $r^2 \geq 0.7$ ) with body fat percentage-associated index SNPs overlapping two or more regulatory datasets in the same tissue are displayed alphabetically by locus name. Negative distance from nearest GENCODE v12 TSS indicates the variant is 5' of the TSS. Tissues with elements overlapping each SNP are indicated as A=Adipose, B=Blood, I=Pancreatic Islets, L=Liver, N=Brain; Chr, Chromosome; TSS, Transcription Start Site.

**Supplementary Table 20. Pathway enrichment among the 43 loci that showed genome-wide significant or putative evidence ( $P < 10^{-5}$ ) of association with body fat percentage in the all-ancestry analyses using DEPICT, showing the top 72 ( $P \leq 0.01$ ) most significant genesets**

| Re-annotated gene set ID | Re-annotated gene set name                               | P value  | False discovery rate < 0.05? | Gene set genes in associated BFP loci |
|--------------------------|----------------------------------------------------------|----------|------------------------------|---------------------------------------|
| ENSG00000100347          | SAMM50 protein complex                                   | 7.75E-05 | No                           | *, TOMM40, DCN, DTNB                  |
| ENSG00000123338          | NCKAP1L protein complex                                  | 8.59E-05 | No                           | *, FUBP1, RELB, SPRY2                 |
| ENSG00000035115          | SH3YL1 protein complex                                   | 1.99E-04 | No                           | *, RPTOR, APOE, FUBP1                 |
| GO:0051224               | Negative Regulation Of Protein Transport                 | 4.91E-04 | No                           | *, CREB5, RELB, ENSG00000249231       |
| GO:0045687               | Positive Regulation Of Glial Cell Differentiation        | 4.95E-04 | No                           | *, GPRC5B, ENSG00000245719, LMX1B     |
| GO:0007603               | Phototransduction, Visible Light                         | 7.54E-04 | No                           | SLC16A8                               |
| GO:0050872               | White Fat Cell Differentiation                           | 7.64E-04 | No                           | *, PPARG, TOX3, PLA2G6                |
| GO:0043574               | Peroxisomal Transport                                    | 8.49E-04 | No                           | *, PLA2G6, CLASRP, CLPTM1             |
| GO:0006625               | Protein Targeting To Peroxisome                          | 9.60E-04 | No                           | *, PLA2G6, RPTOR, IQCK                |
| GO:0072663               | Establishment Of Protein Localization To Peroxisome      | 9.60E-04 | No                           | *, PLA2G6, RPTOR, IQCK                |
| GO:0072662               | Protein Localization To Peroxisome                       | 9.60E-04 | No                           | *, PLA2G6, RPTOR, IQCK                |
| GO:0018195               | Peptidyl-Arginine Modification                           | 0.001    | No                           | *, TOMM40, EYA2, ENSG00000249231      |
| MP:0010872               | Increased Trabecular Bone Mass                           | 0.001    | No                           | APOC1                                 |
| ENSG00000092208          | GEMIN2 protein complex                                   | 0.001    | No                           | TOMM40, PSMA5                         |
| GO:0016558               | Protein Import Into Peroxisome Matrix                    | 0.002    | No                           | PLA2G6                                |
| ENSG00000131773          | KHDRBS3 protein complex                                  | 0.002    | No                           | *, BEND5, FUBP1, ZNF664               |
| ENSG00000004799          | PDK4 protein complex                                     | 0.002    | No                           | *, CLPTM1, TOMM40, TMEM140            |
| MP:0005100               | Abnormal Choroid Pigmentation                            | 0.002    | No                           | *, TMEM140, BAIAP2L2, APOE            |
| GO:0050953               | Sensory Perception Of Light Stimulus                     | 0.002    | No                           | SLC16A8                               |
| GO:0032391               | Photoreceptor Connecting Cilium                          | 0.002    | No                           | IQCK, RPGRIP1L                        |
| ENSG00000171357          | C1orf190 protein complex                                 | 0.002    | No                           | *, PICK1, CLPTM1, DTNB                |
| GO:0043046               | Dna Methylation Involved In Gamete Generation            | 0.002    | No                           | *, TMEM18, ENSG00000224165, PLA2G6    |
| MP:0002310               | Decreased Susceptibility To Hepatic Steatosis            | 0.003    | No                           | *, APOC1, PPARG, RELB                 |
| GO:0007602               | Phototransduction                                        | 0.003    | No                           | SLC16A8                               |
| ENSG00000034693          | PEX3 protein complex                                     | 0.003    | No                           | CLPTM1                                |
| ENSG00000088247          | KHSRP protein complex                                    | 0.003    | No                           | FUBP1                                 |
| GO:0007601               | Visual Perception                                        | 0.003    | No                           | SLC16A8                               |
| MP:0008528               | Polycystic Kidney                                        | 0.003    | No                           | *, IQCK, SPRY2, GIPC2                 |
| GO:0005452               | Inorganic Anion Exchanger Activity                       | 0.003    | No                           | SLC16A8                               |
| ENSG00000121390          | PSPC1 protein complex                                    | 0.004    | No                           | *, FUBP1, CLASRP, NEXN                |
| GO:0060347               | Heart Trabecula Formation                                | 0.004    | No                           | *, GIPR, AGBL4, CREB5                 |
| GO:0015701               | Bicarbonate Transport                                    | 0.004    | No                           | *, ENSG00000249231, GIPC2, NEGR1      |
| GO:0072372               | Primary Cilium                                           | 0.004    | No                           | IQCK, RPGRIP1L                        |
| GO:0090317               | Negative Regulation Of Intracellular Protein Transport   | 0.004    | No                           | *, CLASRP, ENSG00000249231, CREB5     |
| GO:0031513               | Nonmotile Primary Cilium                                 | 0.004    | No                           | SLC16A8                               |
| GO:0072164               | Mesonephric Tubule Development                           | 0.004    | No                           | *, DTNB, CRTC1, DCN                   |
| GO:0072163               | Mesonephric Epithelium Development                       | 0.004    | No                           | *, DTNB, CRTC1, DCN                   |
| ENSG00000137324          | ENSG00000137324 protein complex                          | 0.005    | No                           | *, C7orf49, CRTC1, HSD17B12           |
| ENSG00000206376          | EHMT2 protein complex                                    | 0.005    | No                           | *, C7orf49, CRTC1, HSD17B12           |
| ENSG00000204371          | EHMT2 protein complex                                    | 0.005    | No                           | *, C7orf49, CRTC1, HSD17B12           |
| MP:0001566               | Hyperphosphatemia                                        | 0.005    | No                           | *, TOX3, LMX1B, GIPC2                 |
| GO:0042462               | Eye Photoreceptor Cell Development                       | 0.006    | No                           | *, AGBL3, IQCH, ENSG00000245719       |
| GO:0042551               | Neuron Maturation                                        | 0.006    | No                           | *, WDR91, LMX1B, PICK1                |
| ENSG00000166025          | AMOTL1 protein complex                                   | 0.006    | No                           | *, FUBP1, RPGRIP1L, ZNF746            |
| GO:0009629               | Response To Gravity                                      | 0.006    | No                           | *, IQCH, ENSG00000233715, DNAH10      |
| GO:0042461               | Photoreceptor Cell Development                           | 0.006    | No                           | SLC16A8                               |
| GO:0009584               | Detection Of Visible Light                               | 0.006    | No                           | *, SLC16A8, MC4R, DNAH10              |
| MP:0008585               | Absent Photoreceptor Outer Segment                       | 0.006    | No                           | SLC16A8                               |
| MP:0000153               | Rib Bifurcation                                          | 0.006    | No                           | EYA2                                  |
| ENSG00000100284          | TOM1 protein complex                                     | 0.006    | No                           | *, RPTOR, C7orf49, ZNF746             |
| ENSG00000181656          | GPR88 protein complex                                    | 0.007    | No                           | CLASRP, FUBP1                         |
| GO:0035112               | Genitalia Morphogenesis                                  | 0.007    | No                           | *, PPARG, TNF1, ENSG00000249231       |
| ENSG00000159086          | GCFC1 protein complex                                    | 0.007    | No                           | CLASRP, CLPTM1                        |
| ENSG00000065268          | WDR18 protein complex                                    | 0.007    | No                           | *, TOMM40, FUBP1, IGF2BP1             |
| ENSG00000173465          | SSSCA1 protein complex                                   | 0.007    | No                           | *, TOMM40, CLPTM1, TNF1               |
| MP:0000786               | Abnormal Embryonic Neuroepithelial Layer Differentiation | 0.008    | No                           | *, IGF2BP1, EYA2, PSMA5               |
| GO:0019433               | Triglyceride Catabolic Process                           | 0.008    | No                           | PPARG                                 |
| GO:0009416               | Response To Light Stimulus                               | 0.008    | No                           | *, SLC16A8, MC4R, EYA2                |

## S20-DEPICT top enriched pathway

|                 |                                                          |       |    |                                   |
|-----------------|----------------------------------------------------------|-------|----|-----------------------------------|
| GO:0015301      | Anion:Anion Antiporter Activity                          | 0.008 | No | SLC16A8                           |
| GO:0046464      | Acylglycerol Catabolic Process                           | 0.008 | No | PPARG                             |
| GO:0046461      | Neutral Lipid Catabolic Process                          | 0.008 | No | PPARG                             |
| GO:0044269      | Glycerol Ether Catabolic Process                         | 0.008 | No | PPARG                             |
| ENSG00000164751 | PEX2 protein complex                                     | 0.008 | No | *, APOC1, PLA2G6, HSD17B12        |
| GO:0032924      | Activin Receptor Signaling Pathway                       | 0.009 | No | *, ASXL2, CCDC92, ENSG00000245719 |
| ENSG00000162928 | PEX13 protein complex                                    | 0.009 | No | *, RPTOR, CLPTM1, PSMA5           |
| GO:0009583      | Detection Of Light Stimulus                              | 0.009 | No | SLC16A8                           |
| GO:0072202      | Cell Differentiation Involved In Metanephros Development | 0.01  | No | *, ENSG00000245719, DCN, BAIAP2L2 |
| ENSG00000089351 | GRAMD1A protein complex                                  | 0.01  | No | *, PLA2G6, ENSG00000228536, SPRY2 |
| MP:0000522      | Kidney Cortex Cysts                                      | 0.01  | No | *, DCN, SPRY2, IQCK               |
| GO:0030890      | Positive Regulation Of B Cell Proliferation              | 0.01  | No | *, HIVEP3, COBLL1, CLASRP         |
| GO:0007031      | Peroxisome Organization                                  | 0.01  | No | *, PLA2G6, RPTOR, C7orf49         |
| MP:0000372      | Irregular Coat Pigmentation                              | 0.01  | No | *, SLC16A8, DCN, LMX1B            |
| ENSG00000121691 | CAT protein complex                                      | 0.01  | No | *, RPTOR, HSD17B12, ZNF746        |

**Supplementary Table 21. Tissue enrichment among the 43 loci that showed genome-wide significant or putative evidence ( $P < 10^{-5}$ ) of association with body fat percentage in the all-ancestry analyses using DEPICT, showing the top 54 ( $P < 0.10$ ) most significant results.**

| Tissue annotation MeSH Term         | Tissue annoation                    | P value | False discovery rate < 0.05? |
|-------------------------------------|-------------------------------------|---------|------------------------------|
| A06.688.357                         | Hypothalamo-Hypophyseal System      | 0.01    | No                           |
| A08.713.357.750                     | Pituitary Gland                     | 0.01    | No                           |
| A06.407.747                         | Pituitary Gland                     | 0.01    | No                           |
| A08.186.211.730.317.357.352         | Hypothalamus, Middle                | 0.01    | No                           |
| A08.186.211.730.317.357.352.435     | Hypothalamo-Hypophyseal System      | 0.01    | No                           |
| A08.713.357                         | Hypothalamo-Hypophyseal System      | 0.01    | No                           |
| A06.688.357.750                     | Pituitary Gland                     | 0.01    | No                           |
| A08.713                             | Neurosecretory Systems              | 0.01    | No                           |
| A06.688                             | Neurosecretory Systems              | 0.01    | No                           |
| A08.186.211.730.317.357.352.435.500 | Pituitary Gland                     | 0.01    | No                           |
| A11.251.860.180.432                 | Hep G2 Cells                        | 0.02    | No                           |
| A11.436.348.500                     | Hep G2 Cells                        | 0.02    | No                           |
| A10.690.467.491                     | Muscle, Smooth, Vascular            | 0.02    | No                           |
| A02.633.570.491                     | Muscle, Smooth, Vascular            | 0.02    | No                           |
| A07.231.491                         | Muscle, Smooth, Vascular            | 0.02    | No                           |
| A08.186.211.730.317.357             | Hypothalamus                        | 0.03    | No                           |
| A11.251.210.190.495                 | Jurkat Cells                        | 0.03    | No                           |
| A15.382.490.555.567.569.440         | Jurkat Cells                        | 0.03    | No                           |
| A11.251.860.180.495                 | Jurkat Cells                        | 0.03    | No                           |
| A11.436.348                         | Hepatocytes                         | 0.04    | No                           |
| A11.620.520                         | Myocytes, Smooth Muscle             | 0.05    | No                           |
| A11.620                             | Muscle Cells                        | 0.05    | No                           |
| A11.436                             | Epithelial Cells                    | 0.05    | No                           |
| A11.251.860.180                     | Cell Line, Tumor                    | 0.05    | No                           |
| A11.251.210.190                     | Cell Line, Tumor                    | 0.05    | No                           |
| A11.251.860                         | Tumor Cells, Cultured               | 0.05    | No                           |
| A11.872.190.260                     | Embryoid Bodies                     | 0.06    | No                           |
| A11.627.624.249                     | Monocyte-Macrophage Precursor Cells | 0.06    | No                           |
| A11.627.624.249.500                 | U937 Cells                          | 0.06    | No                           |
| A11.627.482.665                     | Monocyte-Macrophage Precursor Cells | 0.06    | No                           |
| A11.627.635.675.750                 | Monocyte-Macrophage Precursor Cells | 0.06    | No                           |
| A11.627.635.675.750.500             | U937 Cells                          | 0.06    | No                           |
| A11.251.860.180.880                 | U937 Cells                          | 0.06    | No                           |
| A11.251.210.190.880                 | U937 Cells                          | 0.06    | No                           |
| A11.627.482.665.500                 | U937 Cells                          | 0.06    | No                           |
| A02.633                             | Muscles                             | 0.07    | No                           |

## S21-DEPICT top enriched Tissue

|                         |                         |      |    |
|-------------------------|-------------------------|------|----|
| A10.690                 | Muscles                 | 0.07 | No |
| A15.145.846             | Serum                   | 0.09 | No |
| A12.207.152.846         | Serum                   | 0.09 | No |
| A15.382.490.555         | Leukocytes, Mononuclear | 0.09 | No |
| A11.118.637.555         | Leukocytes, Mononuclear | 0.09 | No |
| A15.145.229.637.555     | Leukocytes, Mononuclear | 0.09 | No |
| A15.382.490.555.652     | Monocytes               | 0.09 | No |
| A15.382.812.547         | Monocytes               | 0.09 | No |
| A15.382.680.547         | Monocytes               | 0.09 | No |
| A11.118.637.555.652     | Monocytes               | 0.09 | No |
| A15.145.229.637.555.652 | Monocytes               | 0.09 | No |
| A15.378.316.580         | Monocytes               | 0.09 | No |
| A11.733.547             | Monocytes               | 0.09 | No |
| A11.148.580             | Monocytes               | 0.09 | No |
| A11.627.624             | Monocytes               | 0.09 | No |
| A08.186.211.730.317     | Diencephalon            | 0.09 | No |
| A11.118.188             | Blood Platelets         | 0.10 | No |
| A15.145.229.188         | Blood Platelets         | 0.10 | No |

---



Supplementary Table 22. Ingenuity IPA canonical pathway analysis

| Ingenuity Canonical Pathways                               | P value <sup>a</sup> | False-Discovery Rate | Ratio <sup>b</sup> | Input gene list in each pathway |
|------------------------------------------------------------|----------------------|----------------------|--------------------|---------------------------------|
| Role of JAK2 in Hormone-like Cytokine Signaling            | 0.005                | 0.32                 | 0.054              | IRS1,SH2B1                      |
| N-acetylglucosamine Degradation I                          | 0.012                | 0.32                 | 0.111              | GNPDA2                          |
| N-acetylglucosamine Degradation II                         | 0.015                | 0.32                 | 0.077              | GNPDA2                          |
| Estrogen-Dependent Breast Cancer Signaling                 | 0.016                | 0.32                 | 0.027              | HSD17B12,CREB5                  |
| Neurotrophin/TRK Signaling                                 | 0.019                | 0.32                 | 0.026              | SPRY2,CREB5                     |
| ERK/MAPK Signaling                                         | 0.02                 | 0.32                 | 0.014              | PPARG,PLA2G6,CREB5              |
| cAMP-mediated signaling                                    | 0.03                 | 0.36                 | 0.013              | HTR1A,CREB5,MC4R                |
| UDP-N-acetyl-D-galactosamine Biosynthesis II               | 0.03                 | 0.36                 | 0.040              | GNPDA2                          |
| Protein Ubiquitination Pathway                             | 0.04                 | 0.37                 | 0.011              | DNAJB4,DNAJC27,PSMA5            |
| G-Protein Coupled Receptor Signaling                       | 0.04                 | 0.37                 | 0.011              | HTR1A,CREB5,MC4R                |
| Gas Signaling                                              | 0.05                 | 0.37                 | 0.016              | CREB5,MC4R                      |
| Type II Diabetes Mellitus Signaling                        | 0.05                 | 0.37                 | 0.012              | PPARG,IRS1                      |
| p38 MAPK Signaling                                         | 0.05                 | 0.37                 | 0.017              | PLA2G6,CREB5                    |
| Insulin Receptor Signaling                                 | 0.06                 | 0.39                 | 0.013              | IRS1,RPTOR                      |
| AMPK Signaling                                             | 0.06                 | 0.39                 | 0.011              | IRS1,RPTOR                      |
| Polyamine Regulation in Colon Cancer                       | 0.07                 | 0.39                 | 0.033              | PPARG                           |
| Aldosterone Signaling in Epithelial Cells                  | 0.08                 | 0.39                 | 0.012              | DNAJB4,DNAJC27                  |
| MIF-mediated Glucocorticoid Regulation                     | 0.10                 | 0.39                 | 0.024              | PLA2G6                          |
| Serotonin Receptor Signaling                               | 0.10                 | 0.39                 | 0.020              | HTR1A                           |
| Circadian Rhythm Signaling                                 | 0.10                 | 0.39                 | 0.026              | CREB5                           |
| IL-9 Signaling                                             | 0.10                 | 0.39                 | 0.025              | IRS1                            |
| NRF2-mediated Oxidative Stress Response                    | 0.11                 | 0.39                 | 0.010              | DNAJB4,MAFF                     |
| Estrogen Biosynthesis                                      | 0.11                 | 0.39                 | 0.020              | HSD17B12                        |
| ILK Signaling                                              | 0.11                 | 0.39                 | 0.010              | IRS1,CREB5                      |
| Thyroid Cancer Signaling                                   | 0.12                 | 0.39                 | 0.023              | PPARG                           |
| mTOR Signaling                                             | 0.12                 | 0.39                 | 0.009              | IRS1,RPTOR                      |
| MIF Regulation of Innate Immunity                          | 0.12                 | 0.39                 | 0.019              | PLA2G6                          |
| Dermatan Sulfate Biosynthesis (Late Stages)                | 0.12                 | 0.39                 | 0.021              | HS6ST3                          |
| Role of Oct4 in Mammalian Embryonic Stem Cell Pluripotency | 0.13                 | 0.39                 | 0.019              | IGF2BP1                         |
| Role of IL-17F in Allergic Inflammatory Airway Diseases    | 0.13                 | 0.39                 | 0.021              | CREB5                           |
| Chondroitin Sulfate Biosynthesis (Late Stages)             | 0.13                 | 0.39                 | 0.018              | HS6ST3                          |
| Heparan Sulfate Biosynthesis (Late Stages)                 | 0.14                 | 0.39                 | 0.016              | HS6ST3                          |
| Chondroitin Sulfate Biosynthesis                           | 0.16                 | 0.39                 | 0.014              | HS6ST3                          |
| Dermatan Sulfate Biosynthesis                              | 0.16                 | 0.39                 | 0.014              | HS6ST3                          |
| Phospholipase C Signaling                                  | 0.16                 | 0.39                 | 0.008              | PLA2G6,CREB5                    |
| Heparan Sulfate Biosynthesis                               | 0.16                 | 0.39                 | 0.013              | HS6ST3                          |
| Phospholipases                                             | 0.16                 | 0.39                 | 0.015              | PLA2G6                          |
| ATM Signaling                                              | 0.17                 | 0.39                 | 0.015              | CREB5                           |
| Role of JAK1 and JAK3 in $\gamma$ c Cytokine Signaling     | 0.17                 | 0.39                 | 0.015              | IRS1                            |
| Eicosanoid Signaling                                       | 0.18                 | 0.39                 | 0.012              | PLA2G6                          |
| ERK5 Signaling                                             | 0.18                 | 0.39                 | 0.015              | CREB5                           |
| Angiotensin Signaling                                      | 0.18                 | 0.39                 | 0.013              | GRB14                           |
| Hypoxia Signaling in the Cardiovascular System             | 0.18                 | 0.39                 | 0.015              | CREB5                           |
| Role of MAPK Signaling in the Pathogenesis of Influenza    | 0.19                 | 0.39                 | 0.014              | PLA2G6                          |
| GDNF Family Ligand-Receptor Interactions                   | 0.19                 | 0.39                 | 0.013              | IRS1                            |
| Growth Hormone Signaling                                   | 0.19                 | 0.39                 | 0.013              | IRS1                            |
| PEDF Signaling                                             | 0.20                 | 0.39                 | 0.013              | PPARG                           |
| Prolactin Signaling                                        | 0.20                 | 0.39                 | 0.012              | IRS1                            |
| IL-4 Signaling                                             | 0.20                 | 0.39                 | 0.013              | IRS1                            |
| FLT3 Signaling in Hematopoietic Progenitor Cells           | 0.21                 | 0.39                 | 0.013              | CREB5                           |
| VEGF Family Ligand-Receptor Interactions                   | 0.21                 | 0.39                 | 0.011              | PLA2G6                          |
| Prostate Cancer Signaling                                  | 0.23                 | 0.40                 | 0.010              | CREB5                           |
| FXR/RXR Activation                                         | 0.23                 | 0.40                 | 0.009              | PPARG                           |
| Melanocyte Development and Pigmentation Signaling          | 0.23                 | 0.40                 | 0.011              | CREB5                           |

|                                                                                |      |      |       |            |
|--------------------------------------------------------------------------------|------|------|-------|------------|
| FGF Signaling                                                                  | 0.23 | 0.40 | 0.011 | CREB5      |
| Neuregulin Signaling                                                           | 0.24 | 0.40 | 0.010 | DCN        |
| Crosstalk between Dendritic Cells and Natural Killer Cells                     | 0.24 | 0.40 | 0.009 | PVRL2      |
| Fcγ Receptor-mediated Phagocytosis in Macrophages and Monocytes                | 0.25 | 0.40 | 0.009 | PLA2G6     |
| PPAR Signaling                                                                 | 0.25 | 0.40 | 0.009 | PPARG      |
| SAPK/JNK Signaling                                                             | 0.25 | 0.40 | 0.010 | IRS1       |
| Antioxidant Action of Vitamin C                                                | 0.26 | 0.40 | 0.009 | PLA2G6     |
| IGF-1 Signaling                                                                | 0.26 | 0.40 | 0.009 | IRS1       |
| NGF Signaling                                                                  | 0.28 | 0.41 | 0.008 | CREB5      |
| Fc Epsilon RI Signaling                                                        | 0.29 | 0.41 | 0.009 | PLA2G6     |
| Corticotropin Releasing Hormone Signaling                                      | 0.30 | 0.41 | 0.007 | CREB5      |
| CCR3 Signaling in Eosinophils                                                  | 0.30 | 0.41 | 0.007 | PLA2G6     |
| Sperm Motility                                                                 | 0.31 | 0.41 | 0.007 | PLA2G6     |
| Synaptic Long Term Potentiation                                                | 0.31 | 0.41 | 0.008 | CREB5      |
| p70S6K Signaling                                                               | 0.31 | 0.41 | 0.008 | IRS1       |
| Atherosclerosis Signaling                                                      | 0.31 | 0.41 | 0.007 | PLA2G6     |
| P2Y Purigenic Receptor Signaling Pathway                                       | 0.31 | 0.41 | 0.007 | CREB5      |
| Gαi Signaling                                                                  | 0.31 | 0.41 | 0.007 | HTR1A      |
| PI3K Signaling in B Lymphocytes                                                | 0.33 | 0.42 | 0.007 | IRS1       |
| Protein Kinase A Signaling                                                     | 0.33 | 0.42 | 0.005 | CREB5,EYA2 |
| GNRH Signaling                                                                 | 0.33 | 0.42 | 0.007 | CREB5      |
| IL-12 Signaling and Production in Macrophages                                  | 0.34 | 0.42 | 0.006 | PPARG      |
| Synaptic Long Term Depression                                                  | 0.35 | 0.44 | 0.006 | PLA2G6     |
| Epithelial Adherens Junction Signaling                                         | 0.36 | 0.44 | 0.006 | PVRL2      |
| Regulation of eIF4 and p70S6K Signaling                                        | 0.37 | 0.44 | 0.006 | IRS1       |
| Tight Junction Signaling                                                       | 0.38 | 0.45 | 0.006 | PVRL2      |
| Germ Cell-Sertoli Cell Junction Signaling                                      | 0.38 | 0.45 | 0.006 | PVRL2      |
| B Cell Receptor Signaling                                                      | 0.39 | 0.45 | 0.006 | CREB5      |
| Dopamine-DARPP32 Feedback in cAMP Signaling                                    | 0.40 | 0.45 | 0.005 | CREB5      |
| Endothelin-1 Signaling                                                         | 0.41 | 0.45 | 0.005 | PLA2G6     |
| CREB Signaling in Neurons                                                      | 0.42 | 0.45 | 0.005 | CREB5      |
| Ephrin Receptor Signaling                                                      | 0.42 | 0.45 | 0.005 | CREB5      |
| PPARα/RXRα Activation                                                          | 0.42 | 0.45 | 0.005 | IRS1       |
| Sertoli Cell-Sertoli Cell Junction Signaling                                   | 0.42 | 0.45 | 0.005 | PVRL2      |
| Dendritic Cell Maturation                                                      | 0.42 | 0.45 | 0.005 | CREB5      |
| Calcium Signaling                                                              | 0.43 | 0.45 | 0.005 | CREB5      |
| LPS/IL-1 Mediated Inhibition of RXR Function                                   | 0.50 | 0.51 | 0.004 | HS6ST3     |
| Huntington's Disease Signaling                                                 | 0.50 | 0.51 | 0.004 | CREB5      |
| Cardiac Hypertrophy Signaling                                                  | 0.50 | 0.51 | 0.004 | IRS1       |
| Xenobiotic Metabolism Signaling                                                | 0.57 | 0.57 | 0.003 | HS6ST3     |
| Role of Macrophages, Fibroblasts and Endothelial Cells in Rheumatoid Arthritis | 0.61 | 0.61 | 0.003 | CREB5      |

<sup>a</sup>P values were calculated based on Fisher's right tailed exact test.

<sup>b</sup>Ratio of the number of genes from the input dataset in the selected pathway relative to the total number of genes in that pathway

Supplementary Table 23. Look up of genes located in each of the 12 fat percentage associated loci in a genome-wide transgenic RNAi screen in *Drosophila*

| SNP               | Chr                 | Position    | nearby genes | Fly Ortholog Annotation Symbol | Fly Ortholog Gene Symbol | %change in whole body triglycerides <sup>a</sup> | Validated in second screen? |
|-------------------|---------------------|-------------|--------------|--------------------------------|--------------------------|--------------------------------------------------|-----------------------------|
| rs543874          | 1                   | 176,156,103 | SEC16B       | CG32654                        | Sec16                    | not screened                                     |                             |
|                   |                     |             | RASAL2       | CG42684                        | CG42684                  | not screened                                     |                             |
| rs6755502         | 2                   | 625,721     | TMEM18       | CG30051                        | CG30051                  | +6%, -23%                                        |                             |
|                   |                     |             | SH3YL1       | No known orthologue            |                          |                                                  |                             |
|                   |                     |             | ACP1         | CG14297                        | CG14297                  | not screened                                     |                             |
|                   |                     |             | FAM150B      | No known orthologue            |                          |                                                  |                             |
|                   |                     |             | SNTG2        | CG4905                         | Syn2                     | not screened                                     |                             |
| rs6738627         | 2                   | 165,252,696 | GRB14        | CG11940                        | jog                      | -27%                                             |                             |
|                   |                     |             | SNORA70F     | No known orthologue            |                          |                                                  |                             |
|                   |                     |             | COBLL1       | No known orthologue            |                          |                                                  |                             |
|                   |                     |             | SLC38A11     | CG13743                        | CG13743                  | not screened                                     |                             |
|                   |                     |             | SCN3A        | No known orthologue            |                          |                                                  |                             |
| rs2943652         | 2                   | 226,816,690 | IRS1         | CG5686                         | chico                    | -4%                                              |                             |
| rs693839          | 13                  | 79,856,289  | SPRY2        | CG1921                         | sty                      | -90%                                             | yes                         |
| rs4788099         | 16                  | 28,763,228  | SH2B1        | CG17367                        | LnK                      | not screened                                     |                             |
|                   |                     |             | EIF3CL/EIF3C | CG4954                         | eIF3-S8                  | +14%, -100%                                      |                             |
|                   |                     |             | CLN3         | CG5582                         | cln3                     | -14%                                             |                             |
|                   |                     |             | SULT1A2      | No known orthologue            |                          |                                                  |                             |
|                   |                     |             | APOBR        | No known orthologue            |                          |                                                  |                             |
|                   |                     |             | SULT1A1      | No known orthologue            |                          |                                                  |                             |
|                   |                     |             | IL27         | No known orthologue            |                          |                                                  |                             |
|                   |                     |             | NUPR1        | No known orthologue            |                          |                                                  |                             |
|                   |                     |             | CCDC101      | CG30390                        | Sgf29                    | -17%                                             |                             |
|                   |                     |             | ATXN2L       | CG5166                         | Atx2                     | -57%                                             |                             |
|                   |                     |             | TUFM         | CG6050                         | EFTuM                    | -30%                                             |                             |
|                   |                     |             | ATP2A1       | CG3725                         | Ca-P60A                  | not screened                                     |                             |
|                   |                     |             | RABEP2       | No known orthologue            |                          |                                                  |                             |
|                   |                     |             | SPNS1        | CG8428                         | spin                     | +35%                                             |                             |
|                   |                     |             | LAT          | No known orthologue            |                          |                                                  |                             |
| RRN3P2            | No known orthologue |             |              |                                |                          |                                                  |                             |
| RUNDC2C (SNX29P2) | No known orthologue |             |              |                                |                          |                                                  |                             |
| rs1558902         | 16                  | 52,361,075  | FTO          | No known orthologue            |                          |                                                  |                             |
|                   |                     |             | RBL2         | CG7413                         | Rbf                      | not screened                                     |                             |
|                   |                     |             | AKTIP        | CG16894                        | CG16894                  | -35%                                             |                             |
|                   |                     |             | IRX3         | No known orthologue            |                          |                                                  |                             |
|                   |                     |             | IRX6         | CG10571                        | ara                      | -8%                                              |                             |
|                   |                     |             | IRX6         | CG10605                        | caup                     | 5%                                               |                             |
|                   |                     |             | IRX5         | CG10601                        | mirr                     | 35%                                              |                             |
|                   |                     |             | RPGRIP1L     | No known orthologue            |                          |                                                  |                             |
| rs9906944         | 17                  | 44,446,419  | IGF2BP1      | CG1691                         | Imp                      | -18%                                             |                             |
|                   |                     |             | PRAC         | No known orthologue            |                          |                                                  |                             |

## S23 Fly orthologue screen

|           |    |            |                 |                     |           |              |     |
|-----------|----|------------|-----------------|---------------------|-----------|--------------|-----|
|           |    |            | HOXB13          | CG11648             | Abd-B     | -32%         |     |
|           |    |            | MIR3185         | No known orthologue |           |              |     |
|           |    |            | CALCOCO2        | No known orthologue |           |              |     |
|           |    |            | ATP5G1          | CG1746              | CG1746    | not screened |     |
|           |    |            | UBE2Z           | No known orthologue |           |              |     |
|           |    |            | SNF8            | CG6637              | Isn       | -63%         |     |
|           |    |            | GIP             | No known orthologue |           |              |     |
|           |    |            | B4GALNT2        | No known orthologue |           |              |     |
|           |    |            | NGGT2           | No known orthologue |           |              |     |
|           |    |            | ABI3            | CG9749              | Abi       | +50%         |     |
|           |    |            | PHOSPHO1        | CG14212             | CG14212   | -57%         |     |
|           |    |            | ZNF652          | No known orthologue |           |              |     |
|           |    |            | PHB             | CG10691             | I(2)37Cc  | -62%         |     |
|           |    |            | NGFR            | No known orthologue |           |              |     |
| rs6567160 | 18 | 55,980,115 | MC4R            | CG42244             | Octβ3R    | not screened |     |
| rs757318  | 19 | 18,681,308 | CRTC1           | CG6064              | TORC      | -52%         | yes |
| rs6857    | 19 | 50,084,094 | APOE            | No known orthologue |           |              |     |
|           |    |            | TOMM40          | CG12157             | Tom40     | -22%         |     |
|           |    |            | TOMM40          | CG8330              | tomboy40  | -33%         |     |
|           |    |            | TOMM40          | CG4520              | CG4520    | +15%         |     |
|           |    |            | IGSF23          | No known orthologue |           |              |     |
|           |    |            | PVR             | No known orthologue |           |              |     |
|           |    |            | MIR4531         | No known orthologue |           |              |     |
|           |    |            | CEACAM19        | No known orthologue |           |              |     |
|           |    |            | BCL3            | No known orthologue |           |              |     |
|           |    |            | CBLC            | CG7037              | Cbl       | +20%         |     |
|           |    |            | BCAM            | No known orthologue |           |              |     |
|           |    |            | PVRL2           | No known orthologue |           |              |     |
|           |    |            | APOC1           | No known orthologue |           |              |     |
|           |    |            | APOE            | No known orthologue |           |              |     |
|           |    |            | CLPTM1          | CG3702              | CG3702    | +80%, +22%   |     |
|           |    |            | RELB            | CG6667              | dl        | -8%          |     |
|           |    |            | CLASRP          | CG6695              | CG6695    | -49%         |     |
|           |    |            | ZNF296          | CG9650              | CG9650    | +9%          |     |
|           |    |            | GEMIN7          | No known orthologue |           |              |     |
|           |    |            | LRR68 (PPP1R37) | CG31635             | CG31635   | -43%         |     |
|           |    |            | BLOC1S3         | No known orthologue |           |              |     |
|           |    |            | EXOC3L2         | CG5341              | sec6      | -38%         |     |
|           |    |            | MARK4           | CG8201              | par-1     | not screened |     |
| rs3761445 | 22 | 36,925,357 | PLA2G6          | CG6718              | iPLA2-VIA | not screened |     |
|           |    |            | PICK1           | CG6167              | PICK1     | +6%          |     |
|           |    |            | SOX10           | CG15552             | Sox100B   | -62%         |     |

<sup>a</sup>Not screened or when a fly line is too weak to reach the screening stage.

Value represents percentage difference in whole body triglyceride content between transgenic RNAi lines and wild type flies. When two values are listed, it means that two independent transgenic RNAi lines were available.

Supplementary table 24. The gene list of RNAi knockdown in adult drosophila

| SNP            | Chr.    | Positions (hg18) | Candidate gene in locus <sup>a,b</sup> | Fly orthologue gene symbol | Fly orthologue annotation symbol | Transform ID | Control |      | RNA knockdown |      | Difference (% of control) |     |         |
|----------------|---------|------------------|----------------------------------------|----------------------------|----------------------------------|--------------|---------|------|---------------|------|---------------------------|-----|---------|
|                |         |                  |                                        |                            |                                  |              | Mean    | SE   | Mean          | SE   | Mean                      | SE  | P-value |
| rs543874       | 1       | 176,156,103      | <i>SEC16B</i>                          | Sec16                      | CG32654                          | 29635        | -       | -    | N/A           | N/A  | N/A                       | N/A | N/A     |
|                |         |                  | <i>SEC16B</i>                          | Sec16                      | CG32654                          | 109645       | -       | -    | N/A           | N/A  | N/A                       | N/A | N/A     |
| rs6755502      | 2       | 625,721          | <i>TMEM18</i>                          | CG30051                    | CG30051                          | 43067        | 546     | 84   | 402           | 3    | -26%                      | 15% | 0.23    |
|                |         |                  | <i>TMEM18</i>                          | CG30051                    | CG30051                          | 106840       | 546     | 84   | 447           | 108  | -18%                      | 25% | 0.51    |
| rs6738627      | 2       | 165,252,696      | <i>GRB14</i>                           | pico                       | CG11940                          | 16369        | 546     | 84   | 375           | 34   | -31%                      | 17% | 0.13    |
|                |         |                  | <i>GRB14</i>                           | pico                       | CG11940                          | 16371        | 546     | 84   | 492           | 46   | -10%                      | 18% | 0.61    |
| rs2943652      | 2       | 226,816,690      | <i>IRS1</i>                            | chico                      | CG5686                           | 101329       | 546     | 84   | 380           | 54   | -30%                      | 18% | 0.18    |
|                |         |                  | <i>IRS1</i>                            | chico                      | CG5686                           | 7777         | 546     | 84   | 385           | 44   | -29%                      | 17% | 0.17    |
| rs693839       | 13      | 79,856,289       | <i>SPRY2</i>                           | sty                        | CG1921                           | 6948         | 404     | 25   | 73            | 4    | -82%                      | 6%  | 0.0002  |
| rs4788099      | 16      | 28,763,228       | <i>SH2B1</i>                           | Lnk                        | CG17367                          | 103646       | 546     | 84   | 475           | 43   | -13%                      | 17% | 0.50    |
|                |         |                  | <i>SH2B1</i>                           | Lnk                        | CG17367                          | 32892        | 546     | 84   | 494           | 21   | -9%                       | 16% | 0.59    |
| rs9906944      | 17      | 44,446,419       | <i>IGF2BP1</i>                         | Imp                        | CG1691                           | 20322        | 546     | 84   | 429           | 53   | -21%                      | 18% | 0.31    |
|                |         |                  | <i>IGF2BP1</i>                         | Imp                        | CG1691                           | 20321        | 546     | 84   | 390           | 25   | -28%                      | 16% | 0.15    |
| rs6567160      | 18      | 55,980,115       | <i>MC4R</i>                            | Octβ3R                     | CG42244                          | 9068         | 546     | 84   | 479           | 58   | -12%                      | 19% | 0.55    |
|                |         |                  | <i>MC4R</i>                            | Octβ3R                     | CG42244                          | 106519       | 546     | 84   | 464           | 43   | -15%                      | 17% | 0.44    |
| rs757318       | 19      | 18,681,308       | <i>CRTC1</i>                           | TORC                       | CG6064                           | 100974       | 546     | 84   | 402           | 63   | -26%                      | 19% | 0.25    |
| rs6857         | 19      | 50,084,094       | <i>TOMM40</i>                          | Tom40                      | CG12157                          | 13178        | 546     | 84   | 538           | 95   | -1%                       | 23% | 0.96    |
|                |         |                  | <i>TOMM40</i>                          | Tom40                      | CG12157                          | 13177        | 546     | 84   | 540           | 106  | -1%                       | 25% | 0.97    |
|                |         |                  | <i>TOMM40</i>                          | tomboy40                   | CG8330                           | 105557       | 546     | 84   | 511           | 101  | -6%                       | 24% | 0.81    |
|                |         |                  | <i>TOMM40</i>                          | tomboy40                   | CG8330                           | 42439        | 546     | 84   | 451           | 34   | -17%                      | 17% | 0.36    |
|                |         |                  | <i>TOMM40</i>                          | CG4520                     | CG4520                           | 34862        | 546     | 84   | 345           | 17   | -37%                      | 16% | 0.08    |
|                |         |                  | <i>TOMM40</i>                          | CG4520                     | CG4520                           | 34863        | 546     | 84   | 562           | 50   | 3%                        | 18% | 0.87    |
|                |         |                  | <i>ZNF229</i>                          | ATbp                       | CG17172                          | 110021       | 546     | 84   | 325           | 29   | -40%                      | 16% | 0.07    |
|                |         |                  | <i>ZNF229</i>                          | su(Hw)                     | CG8573                           | 100395       | 546     | 84   | 275           | 84   | -50%                      | 22% | 0.09    |
| rs3761445      | 22      | 36,925,357       | <i>ZNF229</i>                          | su(Hw)                     | CG8573                           | 10724        | 546     | 84   | 384           | 21   | -30%                      | 16% | 0.14    |
|                |         |                  | <i>ZNF229</i>                          | crol                       | CG14938                          | 104313       | 546     | 84   | 650           | 96   | 19%                       | 23% | 0.46    |
|                |         |                  | <i>PLA2G6</i>                          | iPLA2-VIA                  | CG6718                           | 108294       | 546     | 84   | 373           | 22   | -32%                      | 16% | 0.12    |
|                |         |                  | <i>PICK1</i>                           | PICK1                      | CG6167                           | 22268        | 546     | 84   | 244           | 36   | -55%                      | 17% | 0.03    |
|                |         |                  | <i>PICK1</i>                           | PICK1                      | CG6167                           | 22269        | 546     | 84   | 639           | 94   | 17%                       | 23% | 0.50    |
|                |         |                  | <i>SLC16A8</i>                         | CG8468                     | CG8468                           | 6452         | 546     | 84   | 421           | 49   | -23%                      | 18% | 0.27    |
|                |         |                  | <i>SLC16A8</i>                         | CG8468                     | CG8468                           | 6453         | 546     | 84   | 230           | 31   | -58%                      | 16% | 0.02    |
|                |         |                  | <i>SLC16A8</i>                         | Sln                        | CG8271                           | 109464       | 546     | 84   | 409           | 18   | -25%                      | 16% | 0.19    |
| <i>SLC16A8</i> | Sln     | CG8271           | 4607                                   | 546                        | 84                               | 342          | 19      | -37% | 16%           | 0.08 |                           |     |         |
| <i>SLC16A8</i> | CG11665 | CG11665          | 7314                                   | 546                        | 84                               | 369          | 23      | -32% | 16%           | 0.11 |                           |     |         |

N/A: the fly RNAi stocks were not available.

<sup>a</sup>Candidate gene identified based on biological plausible roles in adipocyte metabolism or the nearest gene to the lead SNP.<sup>b</sup>All flies were aged for 2 weeks except the experients for the sty gene. The triglyceride levels were too low for the *SPRY2*#6948 and aged for 1 week.

Supplementary Table 25. Association of established susceptibility loci for BMI and extreme obesity with body fat percentage in the joint GWAS and MetaboChip meta-analysis

| SNP                        | Chr | Position (bp, hg18) | Nearest gene | Effect allele <sup>a</sup> | Other allele | EAF (%) | Per-allele change in BF% <sup>b</sup> | P-value  | N       |
|----------------------------|-----|---------------------|--------------|----------------------------|--------------|---------|---------------------------------------|----------|---------|
| <b>BMI associated loci</b> |     |                     |              |                            |              |         |                                       |          |         |
| rs977747                   | 1   | 47,457,264          | TAL1         | T                          | G            | 40%     | 0.005                                 | 0.32     | 100,394 |
| rs657452                   | 1   | 49,362,434          | AGBL4        | A                          | G            | 41%     | 0.016                                 | 7.96E-04 | 98,205  |
| rs11583200                 | 1   | 50,332,407          | ELAVL4       | C                          | T            | 41%     | 0.017                                 | 2.67E-04 | 99,738  |
| rs3101336                  | 1   | 72,523,773          | NEGR1        | C                          | T            | 62%     | 0.024                                 | 5.21E-07 | 100,638 |
| rs12566985                 | 1   | 74,774,781          | FPGT-TNNI3K  | G                          | A            | 47%     | 0.012                                 | 0.011    | 96,664  |
| rs12401738                 | 1   | 78,219,349          | FUBP1        | A                          | G            | 34%     | 0.023                                 | 3.28E-06 | 90,764  |
| rs11165643                 | 1   | 96,696,685          | PTBP2        | T                          | C            | 57%     | 0.019                                 | 3.65E-05 | 100,658 |
| rs17024393                 | 1   | 109,956,211         | GNAT2        | C                          | T            | 4%      | 0.048                                 | 3.88E-04 | 84,184  |
| rs543874                   | 1   | 176,156,103         | SEC16B       | G                          | A            | 19%     | 0.032                                 | 4.53E-08 | 100,705 |
| rs2820292                  | 1   | 200,050,910         | NAV1         | C                          | A            | 54%     | 0.015                                 | 9.62E-04 | 100,208 |
| rs13021737                 | 2   | 622,348             | TMEM18       | G                          | A            | 83%     | 0.038                                 | 6.38E-09 | 85,050  |
| rs10182181                 | 2   | 25,003,800          | ADCY3        | G                          | A            | 46%     | 0.020                                 | 1.61E-05 | 99,189  |
| rs11126666                 | 2   | 26,782,315          | KCNK3        | A                          | G            | 29%     | 0.006                                 | 0.27     | 100,090 |
| rs1016287                  | 2   | 59,159,129          | FLJ30838     | T                          | C            | 28%     | 0.017                                 | 0.001    | 100,654 |
| rs11688816                 | 2   | 62,906,552          | EHBP1        | G                          | A            | 53%     | 0.012                                 | 0.008    | 98,418  |
| rs2121279                  | 2   | 142,759,755         | LRP1B        | T                          | C            | 15%     | 0.008                                 | 0.25     | 90,659  |
| rs1460676                  | 2   | 164,275,935         | FIGN         | C                          | T            | 18%     | 0.010                                 | 0.089    | 100,696 |
| rs1528435                  | 2   | 181,259,207         | UBE2E3       | T                          | C            | 63%     | 0.011                                 | 0.017    | 100,639 |
| rs17203016                 | 2   | 207,963,763         | CREB1        | G                          | A            | 19%     | 0.017                                 | 0.004    | 96,121  |
| rs7599312                  | 2   | 213,121,476         | ERBB4        | G                          | A            | 73%     | 0.011                                 | 0.030    | 100,136 |
| rs492400                   | 2   | 219,057,996         | USP37        | C                          | T            | 42%     | 0.002                                 | 0.71     | 100,494 |
| rs2176040                  | 2   | 226,801,046         | LOC646736    | A                          | G            | 35%     | 0.033                                 | 1.07E-11 | 99,348  |
| rs6804842                  | 3   | 25,081,441          | RARB         | G                          | A            | 56%     | 0.009                                 | 0.049    | 100,664 |
| rs2365389                  | 3   | 61,211,502          | FHIT         | C                          | T            | 57%     | 0.018                                 | 2.43E-04 | 85,423  |
| rs3849570                  | 3   | 81,874,802          | GBE1         | A                          | C            | 35%     | 0.009                                 | 0.073    | 92,477  |
| rs13078960                 | 3   | 85,890,280          | CADM2        | G                          | T            | 20%     | 0.014                                 | 0.022    | 89,086  |
| rs16851483                 | 3   | 142,758,126         | RASA2        | T                          | G            | 9%      | 0.041                                 | 7.75E-05 | 73,922  |
| rs1516725                  | 3   | 187,306,698         | ETV5         | C                          | T            | 87%     | 0.019                                 | 0.007    | 99,356  |
| rs10938397                 | 4   | 44,877,284          | GNPDA2       | G                          | A            | 43%     | 0.025                                 | 1.36E-07 | 100,137 |
| rs17001654                 | 4   | 77,348,592          | SCARB2       | G                          | C            | 15%     | 0.001                                 | 0.91     | 75,761  |
| rs13107325                 | 4   | 103,407,732         | SLC39A8      | T                          | C            | 7%      | 0.028                                 | 0.0069   | 86,539  |
| rs11727676                 | 4   | 145,878,514         | HHIP         | T                          | C            | 91%     | 0.018                                 | 0.070    | 78,583  |
| rs2112347                  | 5   | 75,050,998          | POC5         | T                          | G            | 60%     | 0.015                                 | 0.0015   | 100,660 |
| rs7715256                  | 5   | 153,518,086         | GALNT10      | G                          | T            | 43%     | 0.006                                 | 0.22     | 100,628 |
| rs205262                   | 6   | 34,671,142          | C6orf106     | G                          | A            | 27%     | 0.015                                 | 0.0029   | 100,165 |
| rs2033529                  | 6   | 40,456,631          | TDRG1        | G                          | A            | 29%     | 0.005                                 | 0.35     | 98,904  |
| rs2207139                  | 6   | 50,953,449          | TFAP2B       | G                          | A            | 18%     | 0.018                                 | 0.00     | 99,380  |
| rs9400239                  | 6   | 109,084,356         | FOXO3        | C                          | T            | 67%     | 0.009                                 | 0.052    | 100,632 |
| rs9374842                  | 6   | 120,227,364         | LOC285762    | T                          | C            | 75%     | 0.007                                 | 0.17     | 100,609 |
| rs13201877                 | 6   | 137,717,234         | IFNGR1       | G                          | A            | 14%     | 0.005                                 | 0.46     | 100,555 |
| rs13191362                 | 6   | 162,953,340         | PARK2        | A                          | G            | 88%     | 0.020                                 | 0.0092   | 90,299  |
| rs1167827                  | 7   | 75,001,105          | HIP1         | G                          | A            | 55%     | 0.017                                 | 0.00     | 85,582  |
| rs2245368                  | 7   | 76,446,079          | PMS2L11      | C                          | T            | 22%     | 0.018                                 | 0.014    | 78,858  |
| rs9641123                  | 7   | 93,035,668          | CALCR        | C                          | G            | 42%     | 0.014                                 | 0.013    | 74,340  |
| rs6465468                  | 7   | 95,007,450          | ASB4         | T                          | G            | 30%     | 0.007                                 | 0.18     | 89,083  |
| rs17405819                 | 8   | 76,969,139          | HNF4G        | T                          | C            | 69%     | 0.016                                 | 0.0013   | 100,510 |
| rs16907751                 | 8   | 81,538,012          | ZBTB10       | C                          | T            | 92%     | 0.032                                 | 0.0011   | 95,712  |
| rs2033732                  | 8   | 85,242,264          | RALYL        | C                          | T            | 75%     | 0.013                                 | 0.017    | 98,859  |
| rs4740619                  | 9   | 15,624,326          | C9orf93      | T                          | C            | 53%     | 0.016                                 | 3.61E-04 | 100,650 |
| rs10968576                 | 9   | 28,404,339          | LINGO2       | G                          | A            | 31%     | 0.021                                 | 2.27E-05 | 100,690 |
| rs6477694                  | 9   | 110,972,163         | EPB41L4B     | C                          | T            | 38%     | 0.001                                 | 0.80     | 100,626 |
| rs1928295                  | 9   | 119,418,304         | TLR4         | T                          | C            | 55%     | 0.010                                 | 0.022    | 100,676 |
| rs10733682                 | 9   | 128,500,735         | LMX1B        | A                          | G            | 49%     | 0.009                                 | 0.059    | 98,469  |
| rs7899106                  | 10  | 87,400,884          | GRID1        | G                          | A            | 6%      | 0.015                                 | 0.17     | 90,804  |
| rs17094222                 | 10  | 102,385,430         | HIF1AN       | C                          | T            | 21%     | 0.018                                 | 0.0015   | 97,104  |

|            |    |             |                     |   |   |     |       |          |         |
|------------|----|-------------|---------------------|---|---|-----|-------|----------|---------|
| rs11191560 | 10 | 104,859,028 | <i>NT5C2</i>        | C | T | 11% | 0.013 | 0.10     | 100,554 |
| rs7903146  | 10 | 114,748,339 | <i>TCF7L2</i>       | C | T | 72% | 0.017 | 0.0013   | 100,633 |
| rs4256980  | 11 | 8,630,515   | <i>TRIM66</i>       | G | C | 63% | 0.013 | 0.006    | 99,357  |
| rs11030104 | 11 | 27,641,093  | <i>BDNF</i>         | A | G | 78% | 0.021 | 2.19E-04 | 97,903  |
| rs2176598  | 11 | 43,820,854  | <i>HSD17B12</i>     | T | C | 25% | 0.020 | 1.84E-04 | 100,691 |
| rs3817334  | 11 | 47,607,569  | <i>MTCH2</i>        | T | C | 40% | 0.020 | 2.91E-05 | 100,566 |
| rs12286929 | 11 | 114,527,614 | <i>CADM1</i>        | G | A | 51% | 0.009 | 0.061    | 99,529  |
| rs7138803  | 12 | 48,533,735  | <i>BCDIN3D</i>      | A | G | 38% | 0.019 | 5.27E-05 | 100,667 |
| rs11057405 | 12 | 121,347,850 | <i>CLIP1</i>        | G | A | 90% | 0.030 | 8.72E-04 | 79,881  |
| rs12016871 | 13 | 26,915,782  | <i>MTIF3</i>        | T | C | 20% | 0.006 | 0.42     | 76,081  |
| rs12429545 | 13 | 53,000,207  | <i>OLFM4</i>        | A | G | 14% | 0.026 | 2.42E-04 | 94,240  |
| rs9540493  | 13 | 65,103,705  | <i>MIR548X2</i>     | A | G | 47% | 0.012 | 0.017    | 98,739  |
| rs1441264  | 13 | 78,478,920  | <i>MIR548A2</i>     | A | G | 62% | 0.012 | 0.017    | 95,911  |
| rs10132280 | 14 | 24,998,019  | <i>STXBP6</i>       | C | A | 68% | 0.002 | 0.63     | 98,739  |
| rs12885454 | 14 | 28,806,589  | <i>PRKD1</i>        | C | A | 65% | 0.014 | 0.0042   | 100,393 |
| rs11847697 | 14 | 29,584,863  | <i>PRKD1</i>        | T | C | 7%  | 0.029 | 0.021    | 85,962  |
| rs7141420  | 14 | 78,969,207  | <i>NRXN3</i>        | T | C | 53% | 0.016 | 3.49E-04 | 100,649 |
| rs3736485  | 15 | 49,535,902  | <i>DMXL2</i>        | A | G | 47% | 0.011 | 0.018    | 100,674 |
| rs16951275 | 15 | 65,864,222  | <i>MAP2K5</i>       | T | C | 75% | 0.014 | 0.011    | 99,391  |
| rs7164727  | 15 | 70,881,044  | <i>LOC100287559</i> | T | C | 67% | 0.016 | 0.0013   | 100,691 |
| rs758747   | 16 | 3,567,359   | <i>NLRC3</i>        | T | C | 28% | 0.013 | 0.019    | 92,550  |
| rs12446632 | 16 | 19,842,890  | <i>GPRC5B</i>       | G | A | 86% | 0.026 | 1.70E-04 | 89,516  |
| rs2650492  | 16 | 28,240,912  | <i>SBK1</i>         | A | G | 30% | 0.018 | 8.58E-04 | 93,316  |
| rs3888190  | 16 | 28,796,987  | <i>ATP2A1</i>       | A | C | 38% | 0.027 | 1.60E-08 | 99,622  |
| rs4787491  | 16 | 29,922,838  | <i>INO80E</i>       | G | A | 50% | 0.008 | 0.10     | 81,508  |
| rs9925964  | 16 | 31,037,396  | <i>KAT8</i>         | A | G | 62% | 0.017 | 0.0013   | 80,083  |
| rs2080454  | 16 | 47,620,091  | <i>CBLN1</i>        | C | A | 40% | 0.015 | 0.0011   | 100,686 |
| rs1558902  | 16 | 52,361,075  | <i>FTO</i>          | A | T | 40% | 0.051 | 3.79E-27 | 99,328  |
| rs9914578  | 17 | 1,951,886   | <i>SMG6</i>         | G | C | 23% | 0.004 | 0.50     | 100,365 |
| rs1000940  | 17 | 5,223,976   | <i>RABEP1</i>       | G | A | 33% | 0.013 | 0.009    | 98,892  |
| rs12940622 | 17 | 76,230,166  | <i>RPTOR</i>        | G | A | 58% | 0.014 | 0.0018   | 100,629 |
| rs1808579  | 18 | 19,358,886  | <i>C18orf8</i>      | C | T | 53% | 0.017 | 3.45E-04 | 98,887  |
| rs7239883  | 18 | 38,401,669  | <i>LOC284260</i>    | G | A | 39% | 0.014 | 0.0035   | 100,233 |
| rs7243357  | 18 | 55,034,299  | <i>GRP</i>          | T | G | 81% | 0.011 | 0.059    | 100,633 |
| rs6567160  | 18 | 55,980,115  | <i>MC4R</i>         | C | T | 25% | 0.034 | 1.33E-10 | 100,642 |
| rs17724992 | 19 | 18,315,825  | <i>PGPEP1</i>       | A | G | 73% | 0.011 | 0.051    | 85,540  |
| rs29941    | 19 | 39,001,372  | <i>KCTD15</i>       | G | A | 66% | 0.009 | 0.061    | 97,970  |
| rs2075650  | 19 | 50,087,459  | <i>TOMM40</i>       | A | G | 85% | 0.037 | 1.44E-07 | 88,215  |
| rs2287019  | 19 | 50,894,012  | <i>QPCTL</i>        | C | T | 81% | 0.027 | 2.77E-05 | 84,821  |
| rs3810291  | 19 | 52,260,843  | <i>ZC3H4</i>        | A | G | 63% | 0.012 | 0.023    | 97,658  |
| rs6091540  | 20 | 50,521,269  | <i>ZFP64</i>        | C | T | 73% | 0.013 | 0.014    | 100,128 |
| rs2836754  | 21 | 39,213,610  | <i>ETS2</i>         | C | T | 58% | 0.011 | 0.022    | 100,374 |

**Extreme obesity associated loci**

|            |    |            |                 |   |   |     |        |          |        |
|------------|----|------------|-----------------|---|---|-----|--------|----------|--------|
| rs11208659 | 1  | 65,751,868 | <i>LEPR</i>     | C | T | 12% | 0.006  | 0.52     | 74,333 |
| rs17381664 | 1  | 77,820,919 | <i>ZZZ3</i>     | C | T | 38% | 0.018  | 1.89E-04 | 96,057 |
| rs17150703 | 8  | 9,783,208  | <i>MSRA</i>     | A | G | 11% | 0.007  | 0.42     | 73,481 |
| rs10508503 | 10 | 16,339,957 | <i>PTER</i>     | C | T | 91% | 0.017  | 0.14     | 61,505 |
| rs564343   | 11 | 65,651,742 | <i>PACS1</i>    | A | G | 43% | 0.020  | 0.20     | 9,208  |
| rs11109072 | 12 | 96,425,401 | <i>RMST</i>     | A | C | 6%  | -0.003 | 0.84     | 54,740 |
| rs7989336  | 13 | 95,815,549 | <i>HS6ST3</i>   | A | G | 49% | 0.020  | 1.74E-04 | 76,115 |
| rs1957894  | 14 | 60,977,864 | <i>PRKCH</i>    | T | G | 12% | 0.006  | 0.50     | 72,140 |
| rs2531995  | 16 | 3,953,468  | <i>ADCY9</i>    | T | C | 58% | 0.017  | 0.0042   | 73,767 |
| rs1424233  | 16 | 78,240,252 | <i>MAF</i>      | A | G | 50% | 0.003  | 0.64     | 75,812 |
| rs1805081  | 18 | 19,394,430 | <i>NPC1</i>     | A | G | 59% | 0.019  | 5.23E-05 | 97,110 |
| rs13041126 | 20 | 50,526,403 | <i>MRPS33P4</i> | T | C | 72% | 0.013  | 0.023    | 76,087 |

Chr, chromosome; EAF, Effect allele frequency.

<sup>a</sup> The effect allele is the allele associated with increased BMI and extreme obesity risk.<sup>b</sup> Effects sizes are expressed in SD, based on inverse normally transformed outcomes (mean 0, SD 1).

**Table 26 Distribution of the imputation quality metrics (proper\_info, rsq) for the 12 BF%-associated loci**

| SNP                                                          | chr | Pos         | Nearby gene    | Percentile |      |      |      |      |
|--------------------------------------------------------------|-----|-------------|----------------|------------|------|------|------|------|
|                                                              |     |             |                | 5%         | 25%  | 50%  | 75%  | 95%  |
| rs1558902                                                    | 16  | 52,361,075  | <i>FTO</i>     | 0.88       | 0.99 | 1.00 | 1.00 | 1.00 |
| rs2943652                                                    | 2   | 226,816,690 | <i>IRS1</i>    | 0.94       | 0.99 | 1.00 | 1.00 | 1.00 |
| rs6567160                                                    | 18  | 55,980,115  | <i>MC4R</i>    | 0.92       | 0.98 | 1.00 | 1.00 | 1.00 |
| rs6755502                                                    | 2   | 625,721     | <i>TMEM18</i>  | 0.94       | 1.00 | 1.00 | 1.00 | 1.00 |
| rs6738627                                                    | 2   | 165,252,696 | <i>COBLL1</i>  | 0.94       | 0.98 | 0.99 | 1.00 | 1.00 |
| rs693839                                                     | 13  | 79,856,289  | <i>SPRY2</i>   | 0.94       | 1.00 | 1.00 | 1.00 | 1.00 |
| rs6857                                                       | 19  | 50,084,094  | <i>TOMM40</i>  | 0.52       | 0.87 | 0.95 | 0.98 | 1.00 |
| rs4788099                                                    | 16  | 28,763,228  | <i>TUFM</i>    | 0.97       | 1.00 | 1.00 | 1.00 | 1.00 |
| rs9906944                                                    | 17  | 44,446,419  | <i>IGF2BP1</i> | 0.82       | 0.92 | 0.95 | 0.98 | 1.00 |
| rs543874                                                     | 1   | 176,156,103 | <i>SEC16B</i>  | 0.94       | 0.99 | 1.00 | 1.00 | 1.00 |
| <b>Loci identified in sex-specific all ancestry analyses</b> |     |             |                |            |      |      |      |      |
| rs3761445                                                    | 22  | 36,925,357  | <i>PLA2G6</i>  | 0.98       | 0.99 | 1.00 | 1.00 | 1.00 |
| rs757318                                                     | 19  | 18,681,308  | <i>CRTC1</i>   | 0.80       | 0.93 | 0.99 | 1.00 | 1.00 |



## SUPPLEMENTARY NOTES

### DETAILED ACKNOWLEDGEMENTS

#### 1. General acknowledgements

D. Timothy Bishop, Mark M. Iles and Julia A. Newton Bishop are supported by: Cancer Research UK Award C588/A19167 and NIH CA083115.

Claude Bouchard is supported by the John W. Barton Sr Chair in Genetics and Nutrition

Martin L Buchkovich is supported by T32GM067553 and American Heart Association 13PRE16930025.

Abbas Dehghan is supported by NWO grant (veni, 916.12.154) and the EUR Fellowship.

Panos Deloukas's work forms part of the research themes contributing to the translational research portfolio of Barts Cardiovascular Biomedical Research Unit which is supported and funded by the National Institute for Health Research.

Alexander W Drong is supported by Wellcome Trust (093933Z/10/Z).

David M Evans is funded by an Australian Research Council Future Fellowship (FT130101709).

Mario Falchi is supported by the British Skin Foundation (grant 5044i).

Terrence S. Furey acknowledges support by the University Cancer Research Fund at UNC Chapel Hill.

Erik Ingelsson is supported by grants from the Swedish Research Council (VR; grant no. 2012-1397), Swedish Diabetes Foundation (Diabetesfonden; grant no. 2013-024), Swedish Heart-Lung Foundation (20140422), Knut och Alice Wallenberg Foundation, European Research Council (ERC-StG-335395) and Göran Gustafsson Foundation.

Anne E Justice is funded through NIH grant T32HL007055-36 and an AHA Postdoctoral Fellowship.

Douglas P. Kiel was supported by grant R01 AR 41398 from the National Institute for Arthritis, Musculoskeletal and Skin Diseases

Tuomas O. Kilpeläinen was supported by the Danish Council for Independent Research (DFF-1333-00124 and Sapere Aude program grant DFF-1331-00730B)

Mika Kivimäki is supported by the UK Medical Research Council (K013351) and the Economic and Social Research Council.

Cecilia Lindgren is supported by Wellcome Trust (086596/Z/08/Z) and the Li Ka Shing Foundation.

Reedik Mägi is funded by European Commission under the Marie Curie Intra-European Fellowship, Estonian Government (grant #SF0180142s08), and the Development Fund of the University of Tartu (grant SP1GVARENG).

Mark McCarthy is supported by Wellcome Trust Senior Investigator Wellcome #098381, Wellcome #090532, Framework VII: HEALTH-F4-2007-201413 (ENGAGE), MRC: MR/J010642/1, NIH: R01-MH101814

CGL (MrOS) receives support from a VA Clinical Science Research and Development Career Development Award, Project number 5IK2CW000729-02.

Karen L Mohlke is supported by National Institutes of Health grants R01DK072193, R01DK093757 and R21DA027040.

Andrew P Morris is a Wellcome Trust Senior Fellow in Basic Biomedical Science and acknowledges funding from the Wellcome Trust under awards WT098017 and WT090532.

Carrie M Nielson is supported by NIAMS K01 AR062655

Kari E North is supported by NIH/NHLBI R01DK089256.

Laura Pascoe is supported by a joint BBSRC and Unilever UK Ltd case PhD studentship.

Tune H Pers is supported by The Danish Council for Independent Research Medical Sciences (FSS), The Alfred Benzon Foundation and The Lundbeck Foundation.

J Brent Richards acknowledges funding from the Canadian Institute of Health Research

Jian Yang is supported by the Australian Research Council (DP130102666) and the Sylvia & Charles Viertel Charitable Foundation.

## **2. Cohort acknowledgements**

**AGES-Reykjavik:** This study has been funded by NIH contract N01-AG-1-2100, the NIA Intramural Research Program, Hjartavernd (the Icelandic Heart Association), and the Althingi (the Icelandic Parliament). The study is approved by the Icelandic National Bioethics Committee, VSN: 00-063. The researchers are indebted to the participants for their willingness to participate in the study.

**Amish:** We gratefully acknowledge our Amish liaisons, field workers and clinic staff and the extraordinary cooperation and support of the Amish community without which these studies would not have been possible. The Amish studies are supported by grants and contracts from the NIH, including U01 HL072515-06, U01 HL84756, U01HL105198, U01 GM074518, F32AR059469, the University of Maryland General Clinical Research Center, grant M01 RR 16500, by the T32 training grant AG000219, and by National Research Initiative Competitive Grant no. 2007-35205-17883 from the USDA National Institute of Food and Agriculture. We thank our Amish research volunteers for their long-standing partnership in research, and the research staff at the Amish Research Clinic for their hard work and dedication.

**ARIC:** The Atherosclerosis Risk in Communities Study is carried out as a collaborative study supported by National Heart, Lung, and Blood Institute contracts (HHSN268201100005C, HHSN268201100006C, HHSN268201100007C, HHSN268201100008C, HHSN268201100009C, HHSN268201100010C, HHSN268201100011C, and HHSN268201100012C), R01HL087641, R01HL59367 and R01HL086694; National Human Genome Research Institute contract U01HG004402; and National Institutes of Health contract HHSN268200625226C. The authors thank the staff and participants of the ARIC study for their important contributions. Infrastructure was partly supported by Grant Number UL1RR025005, a component of the National Institutes of Health and NIH Roadmap for Medical Research.

**BASEII (Berlin Aging Study II):** The Berlin Aging Study II is supported by the German Federal Ministry of Education and Research (Bundesministerium für Bildung und Forschung, BMBF) under grant numbers #16SV5536K, #16SV5537, #16SV5538, and #16SV5837).

**BLSA:** The BLSA was supported by the Intramural Research Program of the NIH, National Institute on Aging.

**B-PROOF:** B-PROOF is supported and funded by The Netherlands Organization for Health Research and Development (ZonMw, Grant 6130.0031), the Hague; unrestricted grant from NZO (Dutch Dairy Association), Zoetermeer; NCHA (Netherlands Consortium Healthy Ageing) Leiden/Rotterdam; Ministry of Economic Affairs, Agriculture and Innovation (project KB-15-004-003), the Hague; Wageningen University, Wageningen; VU University Medical Center, Amsterdam; Erasmus MC, Rotterdam. All organizations are based in the Netherlands. The sponsors do not have any role in the design or implementation of the study, data collection, data management, data analysis, data interpretation, or in the preparation, review, or approval of the manuscript.

**Cardiovascular Health Study:** This CHS research was supported by NHLBI contracts HHSN268201200036C, HHSN268200800007C, N01HC55222, N01HC85079, N01HC85080,

N01HC85081, N01HC85082, N01HC85083, N01HC85086; and NHLBI grants U01HL080295, R01HL087652, R01HL105756, R01HL103612, 1R01AG031890 and R01HL120393 with additional contribution from the National Institute of Neurological Disorders and Stroke (NINDS). Additional support was provided through R01AG023629 from the National Institute on Aging (NIA). A full list of principal CHS investigators and institutions can be found at [CHS-NHLBI.org](http://CHS-NHLBI.org). The provision of genotyping data was supported in part by the National Center for Advancing Translational Sciences, CTSI grant UL1TR000124, and the National Institute of Diabetes and Digestive and Kidney Disease Diabetes Research Center (DRC) grant DK063491 to the Southern California Diabetes Endocrinology Research Center. The content is solely the responsibility of the authors and does not necessarily represent the official views of the National Institutes of Health. All analyses conform to CHS Genetics Policies, which were revised in 1998-99. Individuals who did not consent to genetic studies were excluded.

**CoLaus:** The CoLaus study was and is supported by research grants from GlaxoSmithKline, the Faculty of Biology and Medicine of Lausanne, and the Swiss National Science Foundation (grants 33CSCO-122661, 33CS30-139468 and 33CS30-148401). The authors also express their gratitude to the participants in the Lausanne CoLaus study and to the investigators who have contributed to the study in particular Gérard Waeber, Vincent Mooser and Dawn Waterworth, and the research nurses for data collection.

**COROGENE:** This study has been funded by the Academy of Finland (grant numbers 139635, 129494, 118065, 129322, 250207), the Orion-Farmos Research Foundation, the Finnish Foundation for Cardiovascular Research, and the Sigrid Jusélius Foundation. We are grateful for the THL DNA laboratory for its skillful work to produce the DNA samples used in this study. We thank the Sanger Institute genotyping facilities for genotyping the samples.

**CROATIA-Vis:** The CROATIA-Vis study in the Croatian island of Vis was supported through the grants from the Medical Research Council UK to H.C., A.F.W. and I.R.; and Ministry of Science, Education and Sport of the Republic of Croatia to I.R. (number 108-1080315-0302) and the European Union framework program 6 EUROSPAN project (contract no. LSHG-CT-2006-018947). We would like to acknowledge the invaluable contributions of the recruitment team (including those from the Institute of Anthropological Research in Zagreb) in Vis, the administrative teams in Croatia and Edinburgh and the people of Vis. The SNP genotyping for the CROATIA-Vis cohort was performed in the core genotyping laboratory of the Wellcome Trust Clinical Research Facility at the Western General Hospital, Edinburgh, Scotland.

**DESIR:** This study was supported in part by grants from SFD ("Société Francophone du 358 Diabète"), CPER ("Contrat de Projets État-Région"), and ANR ("Agence Nationale de la 359 Recherche"). The D.E.S.I.R. study has been supported by INSERM contracts with CNAMTS, Lilly, Novartis Pharma and Sanofi-Aventis; by INSERM (Réseaux en Santé Publique, Interactions entre les déterminants de la santé), Cohortes Santé TGIR, the Association Diabète Risque Vasculaire, the Fédération Française de Cardiologie, La Fondation de France, ALFEDIAM, ONIVINS, Ardix Medical, Bayer Diagnostics, Becton Dickinson, Cardionics, Merck Santé, Novo Nordisk, Pierre Fabre, Roche, Topcon. The D.E.S.I.R. Study Group. INSERM U780: B. Balkau, MA Charles, P. Ducimetière, E. Eschwège; INSERM U367: F. Alhenc-Gelas; CHU D'Angers: Y. Gallois, A. Girault; Bichat Hospital: F. Fumeron, M. Marre, R Roussel; CHU Rennes: F Bonnet; CNRS UMR8090, Lille: S. Cauchi, P. Froguel; Centres d'Examens de Santé: Alençon, Angers, Blois, Caen, Chartres, Chateauroux, Cholet, Le Mans, Orleans Tours; Institute de Recherche Médecine Générale: J. Cogneau; General practitioners of the region; Institute inter-Regional pour la Santé: C. Born, E. Caces, M. Cailleau, N Copin, O Lantieri, J.G. Moreau, F. Rakotozafy, J. Tichet, S. Vol.

**DILGOM:** The DILGOM study has been funded by the Academy of Finland (grant numbers 139635, 129494, 118065, 129322, 250207, 136895, 263836), the Orion-Farmos Research Foundation, the Finnish Foundation for Cardiovascular Research, and the Sigrid Jusélius Foundation. We are grateful for the THL DNA laboratory for its skillful work to produce the DNA samples used in this study.

**Ely:** We are grateful to all the volunteers and to the staff of St. Mary's Street Surgery, Ely and the study team. The Ely Study was funded by the MRC (MC\_U106179471) and Diabetes UK. Genotyping in the Ely and Fenland studies was supported in part by an MRC-GlaxoSmithKline pilot programme grant (G0701863).

**EPIC Norfolk:** The EPIC Norfolk diabetes case cohort study is nested within the EPIC Norfolk Study, which is supported by programme grants from the Medical Research Council, and Cancer Research UK and with additional support from the European Union, Stroke Association, British Heart Foundation, Research into Ageing, Department of Health, The Wellcome Trust and the Food Standards Agency. Genotyping was in part supported by the MRC-GSK pilot programme grant. We acknowledge the contribution of the staff and participants of the EPIC-Norfolk Study.

**ERF:** The ERF study as a part of EUROSPAN (European Special Populations Research Network) was supported by European Commission FP6 STRP grant number 018947 (LSHG-CT-2006-01947) and also received funding from the European Community's Seventh Framework Programme (FP7/2007-2013)/grant agreement HEALTH-F4-2007-201413 by the European Commission under the programme "Quality of Life and Management of the Living Resources" of 5th Framework Programme (no. QLG2-CT-2002-01254). The ERF study was further supported by ENGAGE consortium and CMSB. High-throughput analysis of the ERF data was supported by joint grant from Netherlands Organisation for Scientific Research and the Russian Foundation for Basic Research (NWO-RFBR 047.017.043). ERF was further supported by the ZonMw grant (project 91111025). We are grateful to all study participants and their relatives, general practitioners and neurologists for their contributions and to P. Veraart for her help in genealogy, J. Vergeer for the supervision of the laboratory work and P. Snijders for his help in data collection.

**FamHS:** 1R01DK8925601 and 5R01DK075681 (IBB).

**Fels Longitudinal Study:** This Fels Longitudinal Study research was supported by National Institutes of Health grants R01-HD012252, R01-HD053685, R01-DK064391, and R01-AR052147. We also thank the Fels Longitudinal Study participants and data collection staff.

**Fenland:** The Fenland Study is funded by the Wellcome Trust and the Medical Research Council (MC\_U106179471). We are grateful to all the volunteers for their time and help, and to the General Practitioners and practice staff for assistance with recruitment. We thank the Fenland Study Investigators and the Fenland Study co-ordination team, field epidemiology team, data team, and laboratory team as well as the MRC Epidemiology Unit Functional Group team members for business operations, IT and research governance.

**Framingham Study:** This research was conducted in part using data and resources from the Framingham Heart Study of the National Heart Lung and Blood Institute of the National Institutes of Health and Boston University School of Medicine. The analyses reflect intellectual input and resource development from the Framingham Heart Study investigators participating in

the SNP Health Association Resource (SHARe) project. This work was partially supported by the National Heart, Lung and Blood Institute's Framingham Heart Study (Contract No. N01-HC-25195) and its contract with Affymetrix, Inc for genotyping services (Contract No. N02-HL-6-4278). A portion of this research utilized the Linux Cluster for Genetic Analysis (LinGAll) funded by the Robert Dawson Evans Endowment of the Department of Medicine at Boston University School of Medicine and Boston Medical Center. Whole body Dual Energy X-ray Absorptiometry data was supported by the National Institute for Arthritis, Musculoskeletal and Skin Diseases and the National Institute on Aging R01 AR/AG 41398.

**GxE:** Our chief acknowledgement is to the participants in these studies for their willingness to contribute. We also thank Nurses Orgen Brown and Diedre Thomas for assistance with recruitment as well as past and present Laboratory technologists and drivers at TMRU for their invaluable technical assistance. This work was supported by NIH Grants R01HL53353 and R01DK075787.

**GOOD:** Financial support was received from the Swedish Research Council, the Swedish Foundation for Strategic Research, the ALF/LUA research grant in Gothenburg, the Lundberg Foundation, the Torsten and Ragnar Söderberg's Foundation, the Novo Nordisk Foundation, and the European Commission grant HEALTH-F2-2008-201865-GEFOS.

**GOYA:** This study was conducted as part of the activities of the 'Gene-diet Interactions in Obesity' project (GENDINOB, [www.gendinob.dk](http://www.gendinob.dk)) and the MRC centre for Causal Analyses in Translational Epidemiology (MRC CAiTE). We thank the staff of the Copenhagen City Heart Study for their skillful examination of the study subjects in collection of baseline and follow-up data.

**H2000:** The Health 2000 Study was funded by the National Institute for Health and Welfare (THL), the Finnish Centre for Pensions (ETK), the Social Insurance Institution of Finland (KELA), the Local Government Pensions Institution (KEVA) and other organizations listed on the website of the survey (<http://www.terveys2000.fi>). We are grateful for the THL DNA laboratory for its skillful work to produce the DNA samples used in this study. We thank the Sanger Institute genotyping facilities for genotyping the GenMets subcohort.

**HABC (Health ABC):** The Health ABC Study was supported by NIA contracts N01AG62101, N01AG62103, and N01AG62106 and, in part, by the NIA Intramural Research Program. The genome-wide association study was funded by NIA grant 1R01AG032098-01A1 to Wake Forest University Health Sciences and genotyping services were provided by the Center for Inherited Disease Research (CIDR). CIDR is fully funded through a federal contract from the National Institutes of Health to The Johns Hopkins University, contract number HHSN268200782096C. This study utilized the high-performance computational capabilities of the Biowulf Linux cluster at the National Institutes of Health, Bethesda, Md. (<http://biowulf.nih.gov>).

**HBCS:** We thank all study participants as well as everybody involved in the Helsinki Birth Cohort Study. Helsinki Birth Cohort Study has been supported by grants from the Academy of Finland (130326, 134791, 263924), the Finnish Diabetes Research Society, Folkhälsan Research Foundation, Novo Nordisk Foundation, Finska Läkaresällskapet, Signe and Ane Gyllenberg Foundation, Ahokas Foundation, Emil Aaltonen Foundation, Juho Vainio Foundation, Finnish Foundation for Pediatric Research, the Finnish Special Governmental Subsidy for Health Sciences, Samfundet Folkhälsan, Liv och Hälsa, and Wellcome Trust (grant number WT089062). We are grateful for the THL DNA laboratory for its skillful work to produce

the DNA samples used in this study. We thank the Sanger Institute genotyping facilities for genotyping the samples.

**HEALTH2006:** The Health2006 study was financially supported by grants from the Velux Foundation; the Danish Medical Research Council, Danish Agency for Science, Technology and Innovation; the Aase and Ejner Danielsens Foundation; ALK-Abello A/S (Hørsholm, Denmark), Timber Merchant Vilhelm Bangs Foundation, MEKOS Laboratories Denmark) and Research Centre for Prevention and Health, the Capital Region of Denmark. This project was also funded by the Lundbeck Foundation and produced by The Lundbeck Foundation Centre for Applied Medical Genomics in Personalised Disease Prediction, Prevention and Care (LuCamp, [www.lucamp.org](http://www.lucamp.org)). The Novo Nordisk Foundation Center for Basic Metabolic Research is an independent Research Center at the University of Copenhagen partially funded by an unrestricted donation from the Novo Nordisk Foundation ([www.metabol.ku.dk](http://www.metabol.ku.dk)).

**HERITAGE Family Study:** The HERITAGE Family Study is supported by the National Heart, Lung, and Blood Institute Grant HL-45670.

**Johnston County Osteoarthritis Project:** The Johnston County Osteoarthritis Project is supported in part by cooperative agreements S043, S1734, and S3486 from the Centers for Disease Control and Prevention/Association of Schools of Public Health; the NIAMS Multipurpose Arthritis and Musculoskeletal Disease Center grant 5-P60-AR30701; and the NIAMS Multidisciplinary Clinical Research Center grant 5P60 AR49465-03. Genotyping services were provided by Algnomics company.

**KoGES:** This work was supported by the National Genome Research Institute, Korean Center for Disease Control and Prevention (2001-2003-348-6111-221, 2004-347-6111-213, and 2005-347-2400-2440-215). This research was supported by the National Genome Research Institute, the Korean Center for Disease Control and Prevention (contract #2001-347-6111-221, 2002-347-6111-221, 2003-347-6111-221, 2004-E71001-00, 2005-E71001-00, 2006-E71005-00, 2006-E71006-00, 2007-E71001-00, 2007-E71003-00, 2008-E71001-00, 2008-E71005-00, 2009-E71002-00, 2009-E71007-00, 2010-E71001-00, 2010-E71004-00, 2011-E71004-00, 2011-E71008-00, 2012-E71008-00, 2012-E71005-00).

**KORA (F3 and S4/F4):** The KORA research platform (KORA, Cooperative Health Research in the Region of Augsburg) was initiated and financed by the Helmholtz Zentrum München-German Research Center for Environmental Health, which is funded by the German Federal Ministry of Education and Research and by the State of Bavaria. Furthermore, KORA research was supported within the Munich Center of Health Sciences (MC Health), Ludwig-Maximilians-Universität, as part of LMUinnovativ.

**LEIPZIG\_ADULT\_IFB:** This work was supported by the Kompetenznetz Adipositas (Competence network for Obesity) funded by the Federal Ministry of Education and Research (German Obesity Biomaterial Bank; FKZ 01G1128; AD2-6E, AD2-6E95, AD2-6E96, AD2-6E97), a grant from Deutsche Forschungsgemeinschaft the SFB 1052 "Obesity mechanisms" (A01, B01, B03, C01).

**LOLIPOP:** The LOLIPOP study is supported by the National Institute for Health Research (NIHR) Comprehensive Biomedical Research Centre Imperial College Healthcare NHS Trust, the British Heart Foundation (SP/04/002), the Medical Research Council (G0601966,G0700931), the Wellcome Trust (084723/Z/08/Z), the NIHR (RP-PG-0407-10371), European Union FP7 (EpiMigrant, 279143) and Action on Hearing Loss (G51). The work was

carried out in part at the NIHR/Wellcome Trust Imperial Clinical Research Facility. The views expressed are those of the author(s) and not necessarily those of the Imperial College Healthcare NHS Trust, the NIHR or the Department of Health. We thank the participants and research staff who made the study possible.

**MAP (Rush Memory and Aging Project):** The MAP data used in this analysis was supported by National Institute on Aging grants R01AG17917, R01AG15819, R01AG30146, the Illinois Department of Public Health, and the Translational Genomics Research Institute.

**METSIM:** This work was supported by the Academy of Finland (A.S. and M.L.), the Finnish Diabetes Research Foundation (M.L.), the Finnish Cardiovascular Research Foundation (M.L.), Strategic Research Funding from the University of Eastern Finland (M.L.), EVO Grant 5263 from the Kuopio University Hospital (M.L.).

**MrOS:** The Osteoporotic Fractures in Men (MrOS) Study is supported by National Institutes of Health funding. The following institutes provide support: the National Institute on Aging (NIA), the National Institute of Arthritis and Musculoskeletal and Skin Diseases (NIAMS), the National Center for Advancing Translational Sciences (NCATS), and NIH Roadmap for Medical Research under the following grant numbers: U01 AG027810, U01 AG042124, U01 AG042139, U01 AG042140, U01 AG042143, U01 AG042145, U01 AG042168, U01 AR066160, UL1 TR000128, R01 AR051124, and RC2 AR058973.

**ORCADES:** ORCADES was supported by the Chief Scientist Office of the Scottish Government, the Royal Society, the MRC Human Genetics Unit, Arthritis Research UK and the European Union framework program 6 EUROSPAN project (contract no. LSHG-CT-2006-018947). DNA extractions were performed at the Wellcome Trust Clinical Research Facility in Edinburgh. We would like to acknowledge the invaluable contributions of Lorraine Anderson and the research nurses in Orkney, the administrative team in Edinburgh and the people of Orkney.

**PIVUS:** Genotyping was performed by the SNP&SEQ Technology Platform in Uppsala ([www.genotyping.se](http://www.genotyping.se)). We thank Tomas Axelsson, Ann-Christine Wiman and Caisa Pöntinen for their excellent assistance with genotyping. The SNP Technology Platform is supported by Uppsala University, Uppsala University Hospital and the Swedish Research Council for Infrastructures.

**PREVEND:** PREVEND genetics is supported by the Dutch Kidney Foundation (Grant E033), the EU project grant GENECURE (FP-6 LSHM CT 2006 037697), the National Institutes of Health (grant 2R01LM010098), The Netherlands organisation for health research and development (NWO-Groot grant 175.010.2007.006, NWO VENI grant 916.761.70, ZonMw grant 90.700.441), the Netherlands Heart Foundation (grant NHS2010B280) and the Dutch Inter University Cardiology Institute Netherlands (ICIN).

**QFS:** The Quebec Family Study (QFS) was funded by multiple grants from the Medical Research Council of Canada and the Canadian Institutes of Health Research. This work was supported by a team grant from the Canadian Institutes for Health Research (FRCN-CCT-83028).

**RISC:** The RISC Study is supported by European Union grant QLG1-CT-2001-01252 and AstraZeneca.



**RSI and RSIII:** RSI and RSIII: The generation and management of GWAS genotype data for the Rotterdam Study (RS I, RS II, RS III) was executed by the Human Genotyping Facility of the Genetic Laboratory of the Department of Internal Medicine, Erasmus MC, Rotterdam, The Netherlands. The GWAS datasets are supported by the Netherlands Organisation of Scientific Research NWO Investments (nr. 175.010.2005.011, 911-03-012), the Genetic Laboratory of the Department of Internal Medicine, Erasmus MC, the Research Institute for Diseases in the Elderly (014-93-015; RIDE2), the Netherlands Genomics Initiative (NGI)/Netherlands Organisation for Scientific Research (NWO) Netherlands Consortium for Healthy Aging (NCHA), project nr. 050-060-810. We thank Pascal Arp, Mila Jhamai, Marijn Verkerk, Lizbeth Herrera and Marjolein Peters, MSc, and Carolina Medina-Gomez, MSc, for their help in creating the GWAS database, and Karol Estrada, PhD, Yurii Aulchenko, PhD, and Carolina Medina-Gomez, MSc, for the creation and analysis of imputed data. We would like to thank Karol Estrada PhD, Fernando Rivadeneira PhD, and Anis Abuseiris (Erasmus MC Rotterdam, The Netherlands), for their help in creating GRIMP, and we thank BigGRID for access to their grid computing resources.

The Rotterdam Study is funded by Erasmus Medical Center and Erasmus University, Rotterdam, Netherlands Organization for the Health Research and Development (ZonMw), the Research Institute for Diseases in the Elderly (RIDE), the Ministry of Education, Culture and Science, the Ministry for Health, Welfare and Sports, the European Commission (DG XII), and the Municipality of Rotterdam. The authors are grateful to the study participants, the staff from the Rotterdam Study and the participating general practitioners and pharmacists.

**SHIP/SHIP-TREND:** SHIP is part of the Community Medicine Research net of the University of Greifswald, Germany, which is funded by the Federal Ministry of Education and Research (grants no. 01ZZ9603, 01ZZ0103, and 01ZZ0403), the Ministry of Cultural Affairs as well as the Social Ministry of the Federal State of Mecklenburg-West Pomerania, and the network 'Greifswald Approach to Individualized Medicine (GANI\_MED)' funded by the Federal Ministry of Education and Research (grant 03IS2061A). Genome-wide data have been supported by the Federal Ministry of Education and Research (grant no. 03ZIK012) and a joint grant from Siemens Healthcare, Erlangen, Germany and the Federal State of Mecklenburg-West Pomerania. The University of Greifswald is a member of the 'Center of Knowledge Interchange' program of the Siemens AG and the Caché Campus program of the InterSystems GmbH.

**SOF:** The Study of Osteoporotic Fractures (SOF) is supported by National Institutes of Health funding. The National Institute on Aging (NIA) provides support under the following grant numbers: R01 AG005407, R01 AR35582, R01 AR35583, R01 AR35584, R01 AG005394, R01 AG027574, and R01 AG027576.

**Sorbs:** This work was supported by grants from the German Research Council (SFB- 1052 "Obesity mechanisms" to Michael Stumvoll, Anke Tönjes and Peter Kovacs), from the German Diabetes Association (to Anke Tönjes and Peter Kovacs) and from the DHFD (Diabetes Hilfs- und Forschungsfonds Deutschland to Michael Stumvoll and Peter Kovacs). Peter Kovacs is funded by the Boehringer Ingelheim Foundation. We thank all those who participated in the study. Sincere thanks are given to Knut Krohn (Microarray Core Facility of the Interdisciplinary Centre for Clinical Research, University of Leipzig) for the genotyping support.

**SPT:** Our chief acknowledgement is to the participants in these studies for their willingness to contribute. We also thank Nurses Orgen Brown and Diedre Thomas for assistance with recruitment as well as past and present Laboratory technologists and drivers at TMRU for their invaluable technical assistance. This work was supported by NIH Grants R01HL53353 and R01DK075787.



**TwinsUK:** The study was funded by the Wellcome Trust; European Community's Seventh Framework Programme (FP7/2007-2013). The study also receives support from the National Institute for Health Research (NIHR) Clinical Research Facility at Guy's & St Thomas' NHS Foundation Trust and NIHR Biomedical Research Centre based at Guy's and St Thomas' NHS Foundation Trust and King's College London. Tim Spector is an NIHR senior Investigator and is holder of an ERC Advanced Principal Investigator award. SNP Genotyping was performed by The Wellcome Trust Sanger Institute and National Eye Institute via NIH/CIDR.

**ULSAM:** Genotyping was performed by the SNP&SEQ Technology Platform in Uppsala ([www.genotyping.se](http://www.genotyping.se)). We thank Tomas Axelsson, Ann-Christine Wiman and Caisa Pöntinen for their excellent assistance with genotyping. The SNP Technology Platform is supported by Uppsala University, Uppsala University Hospital and the Swedish Research Council for Infrastructures.

**Whitehall II:** The WHII study has been supported by grants from the Medical Research Council; British Heart Foundation; Health and Safety Executive; Department of Health; National Heart Lung and Blood Institute (NHLBI: HL36310) and National Institute on Aging (AG13196), US, NIH; Agency for Health Care Policy Research (HS06516); Medical Research Council (K013351); and the John D and Catherine T MacArthur Foundation Research Networks on Successful Midlife Development and Socio-economic Status and Health.

**YFS:** The Young Finns Study has been financially supported by the Academy of Finland: grants 134309 (Eye), 126925, 121584, 124282, 129378 (Salve), 117787 (Gendi), and 41071 (Skidi), the Social Insurance Institution of Finland, Kuopio, Tampere and Turku University Hospital Medical Funds (grant 9M048 and 9N035 for TeLeht), Juho Vainio Foundation, Paavo Nurmi Foundation, Finnish Foundation of Cardiovascular Research and Finnish Cultural Foundation, Tampere Tuberculosis Foundation and Emil Aaltonen Foundation (T.L). The THL DNA laboratory for its skillful work to produce the DNA samples used in this study and the expert technical assistance in the statistical analyses by Ville Aalto and Irina Lisinen are gratefully acknowledged.

### **3. Contributing Consortia**

#### **The ADIPOGen Consortium**

*Dastani, Z. et al. Novel loci for adiponectin levels and their influence on type 2 diabetes and metabolic traits: a multi-ethnic meta-analysis of 45,891 individuals. PLoS Genet 8, e1002607 (2012).*

Zari Dastani, Marie-France Hivert, Nicholas Timpson, John R.B Perry, Xin Yuan, Robert A. Scott, Peter Henneman, Iris M. Heid, Jorge R. Kizer, Leo-Pekka Lyytikäinen, Christian Fuchsberger, Toshiko Tanaka, Andrew P. Morris, Kerrin Small, Aaron Isaacs, Marian Beekman, Stefan Coassin, Kurt Lohman, Lu Qi, Stavroula Kanoni, James S. Pankow, Hae-Won Uh, Ying Wu, Aurelian Bidulescu, Laura J. Rasmussen-Torvik, Celia M.T. Greenwood, Martin Ladouceur, Jonna Grimsby, Alisa K. Manning, Ching-Ti Liu, Jaspal Kooner, Vincent E. Moser, Peter Vollenweider, Karen A. Kapur, John Chambers, Nicholas J. Wareham, Claudia Langenberg, Rune Frants, Ko Willems-vanDijk, Ben A. Oostra, Sara M. Willems, Claudia Lamina, Thomas Winkler, Bruce M. Psaty, Russell P. Tracy, Jennifer Brody, Ida Chen, Jorma Viikari, Mika Kähönen, Peter P. Pramstaller, -46 David M. Evans, Beate St Pourcain, Naveed Sattar, Andy Wood, Stefania Bandinelli, Olga D. Carlson, Josephine M.

Egan, Stefan Böhringer, Diana van Heemst, Lyudmyla Kedenko, Kati Kristiansson, Marja-Liisa Nuotio, Britt-Marie Loo, Tamara Harris, Melissa Garcia, Alka Kanaya, Margot Haun, Norman Klopp, H. Erich Wichmann, -60 Panos Deloukas, Efi Katsareli, David J. Couper, Bruce B. Duncan, Margreet Kloppenburg, Linda S. Adair, Judith B. Borja, DIAGRAM+ Consortium, MAGIC Consortium, GLGC Investigators, MuTHER Consortium, James G. Wilson, Solomon Musani, Xiuqing Guo, Toby Johnson, Robert Semple, Tanya M. Teslovich, Matthew A. Allison, Susan Redline, Sarah G. Buxbaum, Karen L. Mohlke, Ingrid Meulenbelt, Christie M. Ballantyne, George V. Dedoussis, Frank B. Hu, Yongmei Liu, Bernhard Paulweber, Timothy D. Spector, P. Eline Slagboom, Luigi Ferrucci, Antti Jula, Markus Perola, Olli Raitakari, Jose C. Florez, -82 Veikko Salomaa, Johan G. Eriksson, Timothy M. Frayling, Andrew A Hicks, Terho Lehtimäki, George Davey Smith, David S. Siscovick, Florian Kronenberg, Cornelia van Duijn, Ruth J.F. Loos, Dawn M. Waterworth, James B. Meigs, Josee Dupuis, John Brent Richards.

### **The CARDIoGRAMplusC4D Consortium**

*The CARDIoGRAMplusC4D Consortium, A comprehensive 1000 Genomes-based genome-wide association meta-analysis of coronary artery disease. Nat Genet 47, 1121-30 (2015).*

Panos Deloukas, Stavroula Kanoni, Christina Willenborg, Martin Farrall, Themistocles L Assimes, John R Thompson, Erik Ingelsson, Danish Saleheen, Jeanette Erdmann, Benjamin A Goldstein, Kathleen Stirrups, Inke R König, Jean-Baptiste Cazier, Åsa Johansson, Alistair S Hall, Jong-Young Lee, Cristen J Willer, John C Chambers, Tõnu Esko, Lasse Folkersen, Anuj Goel, Elin Grundberg, Aki S Havulinna, Weang K Ho, Jemma C Hopewell, Niclas Eriksson, Marcus E Kleber, Kati Kristiansson, Per Lundmark, Leo-Pekka Lyytikäinen, Suzanne Rafelt, Dmitry Shungin, Rona J Strawbridge, Gudmar Thorleifsson, Emmi Tikkanen, Natalie Van Zuydam, Benjamin F Voight, Lindsay L Waite, Weihua Zhang, Andreas Ziegler, Devin Absher, David Altshuler-, Anthony J Balmforth, Inês Barroso, Peter S Braund, Christof Burgdorf, Simone Claudi-Boehm, David Cox, Maria Dimitriou, Ron Do, CARDIOGENICS Consortium, DIAGRAM Consortium, Alex S F Doney, NourEddine El Mokhtari, Per Eriksson, Krista Fischer, Pierre Fontanillas, Anders Franco-Cereceda, Bruna Gigante, Leif Groop, Stefan Gustafsson, Jörg Hager, Göran Hallmans, Bok-Ghee Han, Sarah E Hunt, Hyun M Kang, Thomas Illig, Thorsten Kessler, Joshua W Knowles, Genovefa Kolovou, Johanna Kuusisto, Claudia Langenberg, Cordelia Langford, Karin Leander, Marja-Liisa Lokki, Anders Lundmark, Mark I McCarthy, Christa Meisinger, Olle Melander, Evelin Mihailov, Seraya Maouche, Andrew D Morris, Martina Müller-Nurasyid-, MuTHER Consortium, Kjell Nikus, John F Peden, N William Rayner, Asif Rasheed, Silke Rosinger, Diana Rubin, Moritz P Rumpf, Arne Schäfer, Mohan Sivananthan, Ci Song, Alexandre F R Stewart, Sian-Tsung Tan, Gudmundur Thorgeirsson, C Ellen van der Schoot, Peter J Wagner, Wellcome Trust Case Control Consortium, George A Wells, Philipp S Wild, Tsun-Po Yang, Philippe Amouyel, Dominique Arveiler, Hanneke Basart, Michael Boehnke, Eric Boerwinkle, Paolo Brambilla, Francois Cambien, Adrienne L Cupples, Ulf de Faire, Abbas Dehghan, Patrick Diemert, Stephen E Epstein, Alun Evans, Marco M Ferrario, Jean Ferrières, Dominique Gauguier, Alan S Go, Alison H Goodall, Villi Gudnason, Stanley L Hazen, Hilma Holm, Carlos Iribarren, Yangsoo Jang, Mika Kähönen, Frank Kee, Hyo-Soo Kim, Norman Klopp, Wolfgang Koenig, Wolfgang Kratzer, Kari Kuulasmaa, Markku Laakso, Reijo Laaksonen, Ji-Young Lee, Lars Lind, Willem H Ouwehand, Sarah Parish, Jeong E Park, Nancy L Pedersen, Annette Peters, Thomas Quertermous, Daniel J Rader, Veikko Salomaa, Eric Schadt, Svati H Shah, Juha Sinisalo, Klaus Stark, Kari Stefansson, David-Alexandre Trégouët, Jarmo Virtamo, Lars Wallentin, Nicholas Wareham, Martina E Zimmermann, Markku S Nieminen, Christian Hengstenberg, Manjinder S Sandhu, Tomi Pastinen, Ann-Christine Syvänen, G Kees Hovingh, George Dedoussis, Paul W Franks-, Terho Lehtimäki, Andres Metspalu, Pierre A Zalloua, Agneta Siegbahn, Stefan Schreiber, Samuli Ripatti, Stefan S Blankenberg, Markus Perola,

Robert Clarke, Bernhard O Boehm, Christopher O'Donnell, Muredach P Reilly, Winfried März, Rory Collins, Sekar Kathiresan, Anders Hamsten, Jaspal S Kooner, Unnur Thorsteinsdottir, John Danesh, Colin N A Palmer, Robert Roberts, Hugh Watkins, Heribert Schunkert & Nilesh J Samani

#### **The CHARGE Inflammation working group:**

*Dehghan, A. et al. Meta-analysis of genome-wide association studies in >80 000 subjects identifies multiple loci for C-reactive protein levels. Circulation 123, 731-8 (2011).*

Dehghan A, Dupuis J, Barbalic M, Bis JC, Eiriksdottir G, Lu C, Pellikka N, Wallaschofski H, Kettunen J, Henneman P, Baumert J, Strachan DP, Fuchsberger C, Vitart V, Wilson JF, Pare G, Naitza S, Rudock ME, Surakka I, de Geus EJ, Alizadeh BZ, Guralnik J, Shuldiner A, Tanaka T, Zee RY, Schnabel RB, Nambi V, Kavousi M, Ripatti S, Nauck M, Smith NL, Smith AV, Sundvall J, Scheet P, Liu Y, Ruukonen A, Rose LM, Larson MG, Hoogeveen RC, Freimer NB, Teumer A, Tracy RP, Launer LJ, Buring JE, Yamamoto JF, Folsom AR, Sijbrands EJ, Pankow J, Elliott P, Keaney JF, Sun W, Sarin AP, Fontes JD, Badola S, Astor BC, Hofman A, Pouta A, Werdan K, Greiser KH, Kuss O, Meyer zu Schwabedissen HE, Thiery J, Jamshidi Y, Nolte IM, Soranzo N, Spector TD, Volzke H, Parker AN, Aspelund T, Bates D, Young L, Tsui K, Siscovick DS, Guo X, Rotter JI, Uda M, Schlessinger D, Rudan I, Hicks AA, Penninx BW, Thorand B, Gieger C, Coresh J, Willemsen G, Harris TB, Uitterlinden AG, Jarvelin MR, Rice K, Radke D, Salomaa V, Willems van Dijk K, Boerwinkle E, Vasani RS, Ferrucci L, Gibson QD, Bandinelli S, Snieder H, Boomsma DI, Xiao X, Campbell H, Hayward C, Pramstaller PP, van Duijn CM, Peltonen L, Psaty BM, Gudnason V, Ridker PM, Homuth G, Koenig W, Ballantyne CM, Witteman JC, Benjamin EJ, Perola M, Chasman DI

#### **The CHARGE testosterone meta-analysis:**

*Ohlsson, C. et al. Genetic determinants of serum testosterone concentrations in men. PLoS Genet 7, e1002313 (2011).*

Ohlsson C, Wallaschofski H, Lunetta KL, Stolk L, Perry JR, Koster A, Petersen AK, Eriksson J, Lehtimäki T, Huhtaniemi IT, Hammond GL, Maggio M, Coviello AD; EMAS Study Group, Ferrucci L, Heier M, Hofman A, Holliday KL, Jansson JO, Kähönen M, Karasik D, Karlsson MK, Kiel DP, Liu Y, Ljunggren O, Lorentzon M, Lyytikäinen LP, Meitinger T, Mellström D, Melzer D, Miljkovic I, Nauck M, Nilsson M, Penninx B, Pye SR, Vasani RS, Reincke M, Rivadeneira F, Tajar A, Teumer A, Uitterlinden AG, Ulloor J, Viikari J, Völker U, Völzke H, Wichmann HE, Wu TS, Zhuang WV, Ziv E, Wu FC, Raitakari O, Eriksson A, Bidlingmaier M, Harris TB, Murray A, de Jong FH, Murabito JM, Bhasin S, Vandenput L, Haring R

#### **The DIAGRAM Consortium**

*Morris, A.P. et al. Large-scale association analysis provides insights into the genetic architecture and pathophysiology of type 2 diabetes. Nat Genet 44, 981-90 (2012).*

Mahajan A, Go MJ, Zhang W, Below JE, Gaulton KJ, Ferreira T, Horikoshi M, Johnson AD, Ng MC, Prokopenko I, Saleheen D, Wang X, Zeggini E, Abecasis GR, Adair LS, Almgren P, Atalay M, Aung T, Baldassarre D, Balkau B, Bao Y, Barnett AH, Barroso I, Basit A, Been LF, Beilby J, Bell GI, Benediktsson R, Bergman RN, Boehm BO, Boerwinkle E, Bonnycastle LL, Burt N, Cai Q, Campbell H, Carey J, Cauchi S, Caulfield M, Chan JC, Chang LC, Chang TJ, Chang YC, Charpentier G, Chen CH, Chen H, Chen YT, Chia KS, Chidambaram M, Chines PS, Cho NH, Cho YM, Chuang LM, Collins FS, Cornelis MC, Couper DJ, Crenshaw AT, van Dam RM, Danesh J, Das D, de Faire U, Dedoussis G, Deloukas P, Dimas AS, Dina C, Doney AS, Donnelly PJ, Dorkhan M, van Duijn C, Dupuis J, Edkins S, Elliott P, Emilsson V, Erbel R, Eriksson JG, Escobedo J, Esko T, Eury E, Florez JC, Fontanillas P, Forouhi NG, Forsen T, Fox C, Fraser RM, Frayling TM, Froguel P, Frossard P, Gao Y, Gertow K, Gieger C, Gigante B,

Grallert H, Grant GB, Grop LC, Groves CJ, Grundberg E, Guiducci C, Hamsten A, Han BG, Hara K, Hassanali N, Hattersley AT, Hayward C, Hedman AK, Herder C, Hofman A, Holmen OL, Hovingh K, Hreidarsson AB, Hu C, Hu FB, Hui J, Humphries SE, Hunt SE, Hunter DJ, Hveem K, Hydrie ZI, Ikegami H, Illig T, Ingelsson E, Islam M, Isomaa B, Jackson AU, Jafar T, James A, Jia W, Jöckel KH, Jonsson A, Jowett JB, Kadowaki T, Kang HM, Kanoni S, Kao WH, Kathiresan S, Kato N, Katulanda P, Keinanen-Kiukaanniemi KM, Kelly AM, Khan H, Khaw KT, Khor CC, Kim HL, Kim S, Kim YJ, Kinnunen L, Klopp N, Kong A, Korpi-Hyövälti E, Kowlessur S, Kraft P, Kravic J, Kristensen MM, Krithika S, Kumar A, Kumate J, Kuusisto J, Kwak SH, Laakso M, Lagou V, Lakka TA, Langenberg C, Langford C, Lawrence R, Leander K, Lee JM, Lee NR, Li M, Li X, Li Y, Liang J, Liju S, Lim WY, Lind L, Lindgren CM, Lindholm E, Liu CT, Liu JJ, Lobbens S, Long J, Loos RJ, Lu W, Luan J, Lyssenko V, Ma RC, Maeda S, Mägi R, Männistö S, Matthews DR, Meigs JB, Melander O, Metspalu A, Meyer J, Mirza G, Mihailov E, Moebus S, Mohan V, Mohlke KL, Morris AD, Mühleisen TW, Müller-Nurasyid M, Musk B, Nakamura J, Nakashima E, Navarro P, Ng PK, Nica AC, Nilsson PM, Njølstad I, Nöthen MM, Ohnaka K, Ong TH, Owen KR, Palmer CN, Pankow JS, Park KS, Parkin M, Pechlivanis S, Pedersen NL, Peltonen L, Perry JR, Peters A, Pinidiyapathirage JM, Platou CG, Potter S, Price JF, Qi L, Radha V, Rallidis L, Rasheed A, Rathman W, Rauramaa R, Raychaudhuri S, Rayner NW, Rees SD, Rehnberg E, Ripatti S, Robertson N, Roden M, Rossin EJ, Rudan I, Rybin D, Saaristo TE, Salomaa V, Saltevo J, Samuel M, Sanghera DK, Saramies J, Scott J, Scott LJ, Scott RA, Segrè AV, Sehmi J, Sennblad B, Shah N, Shah S, Shera AS, Shu XO, Shuldiner AR, Sigurdsson G, Sijbrands E, Silveira A, Sim X, Sivapalaratnam S, Small KS, So WY, Stančáková A, Stefansson K, Steinbach G, Steinthorsdóttir V, Stirrups K, Strawbridge RJ, Stringham HM, Sun Q, Suo C, Syvänen AC, Takayanagi R, Takeuchi F, Tay WT, Teslovich TM, Thorand B, Thorleifsson G, Thorsteinsdóttir U, Tikkanen E, Trakalo J, Tremoli E, Trip MD, Tsai FJ, Tuomi T, Tuomilehto J, Uitterlinden AG, Valladares-Salgado A, Vedantam S, Veglia F, Voight BF, Wang C, Wareham NJ, Wennauer R, Wickremasinghe AR, Wilsgaard T, Wilson JF, Wiltshire S, Winckler W, Wong TY, Wood AR, Wu JY, Wu Y, Yamamoto K, Yamauchi T, Yang M, Yengo L, Yokota M, Young R, Zabaneh D, Zhang F, Zhang R, Zheng W, Zimmet PZ, Altshuler D, Bowden DW, Cho YS, Cox NJ, Cruz M, Hanis CL, Kooner J, Lee JY, Seielstad M, Teo YY, Boehnke M, Parra EJ, Chambers JC, Tai ES, McCarthy MI, Morris AP.

### **The Early Growth Genetics Consortium (Birth weight)**

*Horikoshi, M. et al. New loci associated with birth weight identify genetic links between intrauterine growth and adult height and metabolism. Nat Genet 45, 76-82 (2013).*

Horikoshi M, Mägi R, van de Bunt M, Surakka I, Sarin AP, Mahajan A, Marullo L, Thorleifsson G, Hägg S, Hottenga JJ, Ladenvall C, Ried JS, Winkler TW, Willems SM, Pervjakova N, Esko T, Beekman M, Nelson CP, Willenborg C, Wiltshire S, Ferreira T, Fernandez J, Gaulton KJ, Steinthorsdóttir V, Hamsten A, Magnusson PK, Willemsen G, Milaneschi Y, Robertson NR, Groves CJ, Bennett AJ, Lehtimäki T, Viikari JS, Rung J, Lyssenko V, Perola M, Heid IM, Herder C, Grallert H, Müller-Nurasyid M, Roden M, Hypponen E, Isaacs A, van Leeuwen EM, Karssen LC, Mihailov E, Houwing-Duistermaat JJ, de Craen AJ, Deelen J, Havulinna AS, Blades M, Hengstenberg C, Erdmann J, Schunkert H, Kaprio J, Tobin MD, Samani NJ, Lind L, Salomaa V, Lindgren CM, Slagboom PE, Metspalu A, van Duijn CM, Eriksson JG, Peters A, Gieger C, Jula A, Groop L, Raitakari OT, Power C, Penninx BW, de Geus E, Smit JH, Boomsma DI, Pedersen NL, Ingelsson E, Thorsteinsdóttir U, Stefansson K, Ripatti S, Prokopenko I, McCarthy MI, Morris AP; ENGAGE Consortium

### **The Early Growth Genetics Consortium (pubertal height)**

Cousminer, D.L. et al. *Genome-wide association and longitudinal analyses reveal genetic loci linking pubertal height growth, pubertal timing and childhood adiposity. Hum Mol Genet* 22, 2735-47 (2013).

Diana L Cousminer, Diane J Berry, Nicholas J Timpson, Wei Ang, Elisabeth Thiering, Enda M Byrne, H Rob Taal, Ville Huikari, Jonathan P Bradfield, Marjan Kerkhof, Maria M Groen-Blokhuis, Eskil Kreiner-Møller, Marcella Marinelli, Claus Holst, Jaakko T Leinonen, John R B Perry, Ida Surakka, Olli Pietiläinen, Johannes Kettunen, Verner Anttila, Marika Kaakinen, Ulla Sovio, Anneli Pouta, Shikta Das, Vasiliki Lagou, Chris Power, Inga Prokopenko, David M Evans, John P Kemp, Beate St Pourcain, Susan Ring, Aarno Palotie, Eero Kajantie, Clive Osmond, Terho Lehtimäki, Jorma S Viikari, Mika Kähönen, Nicole M Warrington, Stephen J Lye, Lyle J Palmer, Carla M T Tiesler, Claudia Flexeder, Grant W Montgomery, Sarah E Medland, Albert Hofman, Hakon Hakonarson, Mònica Guxens, Meike Bartels, Veikko Salomaa, The ReproGen Consortium, Joanne M Murabito, Jaakko Kaprio, Thorkild I A Sørensen, Ferran Ballester, Hans Bisgaard, Dorret I Boomsma, Gerard H Koppelman, Struan F A Grant, Vincent W V Jaddoe, Nicholas G Martin, Joachim Heinrich, Craig E Pennell, Olli T Raitakari, Johan G Eriksson, George Davey Smith, Elina Hyppönen, Marjo-Riitta Järvelin, Mark I McCarthy, Samuli Ripatti & Elisabeth Widén

### **GenoMEL**

Falchi, M. et al. *Genome-wide association study identifies variants at 9p21 and 22q13 associated with development of cutaneous nevi. Nat Genet* 41, 915-9 (2009).

Barrett, J.H. et al. *Genome-wide association study identifies three new melanoma susceptibility loci. Nat Genet* 43, 1108-13 (2011).

Nan, H. et al. *Genome-wide association study identifies nidogen 1 (NID1) as a susceptibility locus to cutaneous nevi and melanoma risk. Hum Mol Genet* 20, 2673-9 (2011).

Barcelona: Paula Aguilera, Beatriz Alejo, Celia Badenas, Abel Caño, Cristina Carrera, Francisco Cuellar, Mireia Dominguez, Daniel Gabriel, Pol Gomenez, Pablo Iglesias, Josep Malveyh, Rosa Marti-Laborda, Montse Mila, Zighe Ogbah, Miriam Potrony, Joan-Anton Puig Butille, Susana Puig, Gemma Tell and Other members of the Melanoma Unit: Llúcia Alós, Ana Arance, Pedro Arguís, Antonio Bennassar, Oscar Chirife, Carlos Conill, Ramon Rull, Marcelo Sánchez, Sergi Vidal-Sicart, Antonio Vilalta.

Emilia-Romagna: Maria Teresa Landi, Donato Calista, Giorgio Landi, Paola Minghetti, Fabio Arcangeli, Pier Alberto Bertazzi.

Genoa: Department of Internal Medicine and Medical Specialties, Laboratory of Genetics of Rare Cancers, University of Genoa/ IRCCS AOU San Martino-IST Istituto Nazionale per la Ricerca sul Cancro: Giovanna Bianchi Scarrà, Paola Ghiorzo, Lorenza Pastorino, William Bruno, Virginia Andreotti, Claudia Martinuzzi, Linda Battistuzzi, Paola Origone. Medical Oncology Unit, IRCCS AOU San Martino-IST Istituto Nazionale per la Ricerca sul Cancro, Genoa :Paola Queirolo.

Glasgow: Rona Mackie, Julie Lang.

Leeds: Julia A Newton Bishop, Paul Affleck, Jennifer H Barrett, D Timothy Bishop, Jane Harrison, Mark M Iles, Juliette Randerson-Moor, Mark Harland, John C Taylor, Linda Whittaker, Kairen Kukalich, Susan Leake, Birute Karpavicius, Sue Haynes, Tricia Mack, May Chan, Yvonne Taylor, John Davies, Paul King.

Leiden: Department of Dermatology, Leiden University Medical Centre: Nelleke A Gruis, Frans A van Nieuwpoort, Coby Out, Clasine van der Drift, Wilma Bergman, Nicole Kukutsch, Jan Nico Bouwes Bavinck. Department of Clinical Genetics, Centre of Human and Clinical Genetics, Leiden University Medical Centre: Bert Bakker, Nienke van der Stoep, Jeanet ter Huurne. Department of Dermatology, Haga Hospital, The Hague: Han van der Rhee. Department of Dermatology, Reinier de Graaf Groep, Delft: Marcel Bekkenk. Department of Dermatology, Sint

Franciscus Gasthuis, Rotterdam: Dyon Snels, Marinus van Praag. Department of Dermatology, Ghent University Hospital, Ghent, Belgium: Lieve Brochez and colleagues. Department of Dermatology, St. Radboud University Medical Centre, Nijmegen: Rianne Gerritsen and colleagues. Department of Dermatology, Rijnland Hospital, Leiderdorp: Marianne Crijns and colleagues. Dutch patient organisation, Stichting Melanoom, Purmerend. The Netherlands Foundation for the detection of Hereditary Tumors, Leiden: Hans Vasen. ServiceXS: Wilbert van Workum, Bart Janssen, Marjolein Janssen and Suzanne Mulder

Lund: Lund Melanoma Study Group: Håkan Olsson, Christian Ingvar, Göran Jönsson, Åke Borg, Anna Måsbäck, Lotta Lundgren, Katja Baeckenhorn, Kari Nielsen, Anita Schmidt Casslén.

Norway: Oslo University Hospital: Per Helsing, Per Arne Andresen, Helge Rootwelt. University of Bergen: Lars A. Akslen, Anders Molven.

Paris: Florence Demenais, Marie-Françoise Avril, Brigitte Bressac-de Paillerets, Eve Maubec, Myriam Brossard, Amaury Vaysse, Hamida Mohamdi, Patricia Jeannin, Valérie Chaudru, Nicolas Chateigner, Eve Corda, Fabienne Lesueur, Mahaut de Lichy and the French Family Study Group including the following oncogeneticists and Dermatologists: Pascale Andry-Benzaquen, Bertrand Bachollet, Frédéric Bérard, Pascaline Berthet, Françoise Boitier, Valérie Bonadona, Jean-Louis Bonafé, Jean-Marie Bonnetblanc, Frédéric Cambazard, Olivier Caron, Frédéric Caux, Jacqueline Chevrant-Breton, Agnès Chompret (deceased), Stéphane Dalle, Liliane Demange, Olivier Dereure, Martin-Xavier Doré, Marie-Sylvie Doutre, Catherine Dugast, Laurence Faivre, Florent Grange, Philippe Humbert, Pascal Joly, Delphine Kerob, Christine Lasset, Marie Thérèse Leccia, Gilbert Lenoir, Dominique Leroux, Julien Levang, Dan Lipsker, Sandrine Mansard, Ludovic Martin, Tanguy Martin-Denavit, Christine Mateus, Jean-Loïc Michel, Patrice Morel, Laurence Olivier-Faivre, Jean-Luc Perrot, Caroline Robert, Sandra Ronger-Savle, Bruno Sassolas, Pierre Souteyrand, Dominique Stoppa-Lyonnet, Luc Thomas, Pierre Vabres, Eva Wierzbicka.

Philadelphia: David Elder, Peter Kanetsky, Jillian Knorr, Michael Ming, Nandita Mitra, Althea Ruffin, Patricia Van Belle

Poland: Tadeusz Dębniak, Jan Lubiński, Aneta Mirecka, Sławomir Ertmański. Slovenia: Srdjan Novakovic, Marko Hocevar, Barbara Peric, Petra Cerkovnik. Stockholm: Veronica Höiom, Johan Hansson.

Sydney: Graham J. Mann, Richard F. Kefford, Helen Schmid, Elizabeth A. Holland

Tel Aviv: Esther Azizi, Gilli Galore-Haskel, Eitan Friedman, Orna Baron-Epel, Alon Scope, Felix Pavlotsky, Emanuel Yakobson, Irit Cohen-Manheim, Yael Laitman, Roni Milgrom, Iris Shimoni, Evgeniya Kozlova.

### **The GLGC Consortium**

*Willer, C.J. et al. Discovery and refinement of loci associated with lipid levels. Nat Genet (2013).*

Cristen J. Willer, Ellen M. Schmidt, Sebanti Sengupta, Gina M. Peloso, Stefan Gustafsson, Stavroula Kanoni, Andrea Ganna, Jin Chen, Martin L. Buchkovich, Samia Mora, Jacques S. Beckmann, Jennifer L. Bragg-Gresham, Hsing-Yi Chang, Ayşe Demirkan, Heleen M. Den Hertog, Ron Do, Louise A. Donnelly, Georg B. Ehret, Tõnu Esko, Mary F. Feitosa, Teresa Ferreira, Krista Fischer, Pierre Fontanillas, Ross M. Fraser, Daniel F. Freitag, Deepti Gurdasani, Kauko Heikkilä, Elina Hyppönen, Aaron Isaacs, Anne U. Jackson, Åsa Johansson, Toby Johnson, Marika Kaakinen, Johannes Kettunen, Marcus E. Kleber, Xiaohui Li, Jian'an Luan, Leo-Pekka Lyytikäinen, Patrik K.E. Magnusson, Massimo Mangino, Evelin Mihailov, May E. Montasser, Martina Müller-Nurasyid, Ilja M. Nolte, Jeffrey R. O'Connell, Cameron D. Palmer, Markus Perola, Ann-Kristin Petersen, Serena Sanna, Richa Saxena, Susan K. Service, Sonia Shah, Dmitry Shungin, Carlo Sidore, Ci Song, Rona J. Strawbridge, Ida Surakka, Toshiko Tanaka, Tanya M. Teslovich, Gudmar Thorleifsson, Evita G. Van den Herik, Benjamin F. Voight, Kelly A. Volcik, Lindsay L. Waite, Andrew Wong, Ying Wu, Weihua Zhang, Devin Absher,

Gershim Asiki, Inês Barroso, Latonya F. Been, Jennifer L. Bolton, Lori L Bonnycastle, Paolo Brambilla, Mary S. Burnett, Giancarlo Cesana, Maria Dimitriou, Alex S.F. Doney, Angela Döring, Paul Elliott, Stephen E. Epstein, Gudmundur Ingi Eyjolfsson, Bruna Gigante, Mark O. Goodarzi, Harald Grallert, Martha L. Gravito, Christopher J. Groves, Göran Hallmans, Anna-Liisa Hartikainen, Caroline Hayward, Dena Hernandez, Andrew A. Hicks, Hilma Holm, Yi-Jen Hung, Thomas Illig, Michelle R. Jones, Pontiano Kaleebu, John J.P. Kastelein, Kay-Tee Khaw, Eric Kim, Norman Klopp, Pirjo Komulainen, Meena Kumari, Claudia Langenberg, Terho Lehtimäki, Shih-Yi Lin, Jaana Lindström, Ruth J.F. Loos, François Mach, Wendy L McArdle, Christa Meisinger, Braxton D. Mitchell, Gabrielle Müller, Ramaiah Nagaraja, Narisu Narisu, Tuomo V.M. Nieminen, Rebecca N. Nsubuga, Isleifur Olafsson, Ken K. Ong, Aarno Palotie, Theodore Papamarkou, Cristina Pomilla, Anneli Pouta, Daniel J. Rader, Muredach P. Reilly, Paul M. Ridker, Fernando Rivadeneira, Igor Rudan, Aimo Ruukonen, Nilesh Samani, Hubert Scharnagl, Janet Seeley, Kaisa Silander, Alena Stančáková, Kathleen Stirrups, Amy J. Swift, Laurence Tiret, Andre G. Uitterlinden, L. Joost van Pelt, Sailaja Vedantam, Nicholas Wainwright, Cisca Wijmenga, Sarah H. Wild, Gonneke Willemsen, Tom Wilsgaard, James F. Wilson, Elizabeth H. Young, Jing Hua Zhao, Linda S. Adair, Dominique Arveiler, Themistocles L. Assimes, Stefania Bandinelli, Franklyn Bennett, Murielle Bochud, Bernhard O. Boehm, Dorret I. Boomsma, Ingrid B. Borecki, Stefan R. Bornstein, Pascal Bovet, Michel Burnier, Harry Campbell, Aravinda Chakravarti, John C. Chambers, Yii-Der Ida Chen, Francis S. Collins, Richard S. Cooper, John Danesh, George Dedoussis, Ulf de Faire, Alan B. Feranil, Jean Ferrières, Luigi Ferrucci, Nelson B. Freimer, Christian Gieger, Leif C. Groop, Vilmundur Gudnason, Ulf Gyllensten, Anders Hamsten, Tamara B. Harris, Aroon Hingorani, Joel N. Hirschhorn, Albert Hofman, G. Kees Hovingh, Chao Agnes Hsiung, Steve E. Humphries, Steven C. Hunt, Kristian Hveem, Carlos Iribarren, Marjo-Riitta Järvelin, Antti Jula, Mika Kähönen, Jaakko Kaprio, Antero Kesäniemi, Mika Kivimäki, Jaspal S. Kooner, Peter J. Koudstaal, Ronald M. Krauss, Diana Kuh, Johanna Kuusisto, Kirsten O. Kyvik, Markku Laakso, Timo A. Lakka, Lars Lind, Cecilia M. Lindgren, Nicholas G. Martin, Winfried März, Mark I. McCarthy, Colin A. McKenzie, Pierre Meneton, Andres Metspalu, Leena Moilanen, Andrew D. Morris, Patricia B. Munroe, Inger Njølstad, Nancy L. Pedersen, Chris Power, Peter P. Pramstaller, Jackie F. Price, Bruce M. Psaty, Thomas Quertermous, Rainer Rauramaa, Danish Saleheen, Veikko Salomaa, Dharambir K. Sanghera, Jouko Saramies, Peter E.H. Schwarz, Wayne H-H Sheu, Alan R. Shuldiner, Agneta Siegbahn, Tim D. Spector, Kari Stefansson, David P. Strachan, Bamidele O. Tayo, Elena Tremoli, Jaakko Tuomilehto, Matti Uusitupa, Cornelia M. van Duijn, Peter Vollenweider, Lars Wallentin, Nicholas J. Wareham, John B. Whitfield, Bruce H.R. Wolffenbuttel, Jose M. Ordovas, Eric Boerwinkle, Colin N.A. Palmer, Unnur Thorsteinsdottir, Daniel I. Chasman, Jerome I. Rotter, Paul W. Franks, Samuli Ripatti, L. Adrienne Cupples, Manjinder S. Sandhu, Stephen S. Rich, Michael Boehnke, Panos Deloukas, Sekar Kathiresan, Karen L. Mohlke, Erik Ingelsson, Gonçalo R. Abecasis

## **MAGIC**

*Scott, R.A. et al. Large-scale association analyses identify new loci influencing glycemic traits and provide insight into the underlying biological pathways. Nat Genet 44, 991-1005 (2012).*

Robert A. Scott, Vasiliki Lagou, Ryan P. Welch, Eleanor Wheeler, May E. Montasser, Jian'an Luan, Reedik Mägi, Rona J. Strawbridge, Emil Rehnberg, Stefan Gustafsson, Stavroula Kanoni, Laura J. Rasmussen-Torvik, Loïc Yengo, Cecile Lecoeur, Dmitry Shungin, Serena Sanna, Carlo Sidore, Paul C. D. Johnson, J. Wouter Jukema, Toby Johnson, Anubha Mahajan, Niek Verweij, Gudmar Thorleifsson, Jouke-Jan Hottenga, Sonia Shah, Albert V. Smith, Bengt Sennblad, Christian Gieger, Perttu Salo, Markus Perola, Nicholas J. Timpson, David M. Evans, Beate St. Pourcain, Ying Wu, Jeanette S. Andrews, Jennie Hui, Lawrence F. Bielak, Wei Zhao, Momoko Horikoshi, Pau Navarro, Aaron Isaacs, Jeffrey R. O'Connell, Kathleen Stirrups, Veronique Vitart,

Caroline Hayward, Tõnu Esko, Evelin Mihailov, Ross M. Fraser, Tove Fall, Benjamin F. Voight, Soumya Raychaudhuri, Han Chen, Cecilia M. Lindgren, Andrew P. Morris, Nigel W. Rayner, Neil Robertson, Denis Rybin, Ching-Ti Liu, Jacques S. Beckmann, Sara M. Willems, Peter S. Chines, Anne U. Jackson, Hyun Min Kang, Heather M. Stringham, Kijoung Song, Toshiko Tanaka, John F. Peden, Anuj Goel, Andrew A. Hicks, Ping An, Martina Müller-Nurasyid, Anders Franco-Cereceda, Lasse Folkersen, Letizia Marullo, Hanneke Jansen, Albertine J. Oldehinkel, Marcel Bruinenberg, James S. Pankow, Kari E. North, Nita G. Forouhi, Ruth J. F. Loos, Sarah Edkins, Tibor V. Varga, Göran Hallmans, Heikki Oksa, Mulas Antonella, Ramaiah Nagaraja, Stella Trompet, Ian Ford, Stephan J. L. Bakker, Augustine Kong, Meena Kumari, Bruna Gigante, Christian Herder, Patricia B. Munroe, Mark Caulfield, Jula Antti, Massimo Mangino, Kerrin Small, Iva Miljkovic, Yongmei Liu, Mustafa Atalay, Wieland Kiess, Alan L. James, Fernando Rivadeneira, Andre G. Uitterlinden, Colin N. A. Palmer, Alex S. F. Doney, Gonneke Willemssen, Johannes H. Smit, Susan Campbell, Ozren Polasek, Lori L. Bonnycastle, Serge Hercberg, Maria Dimitriou, Jennifer L. Bolton, Gerard R. Fowkes, Peter Kovacs, Jaana Lindström, Tatijana Zemunik, Stefania Bandinelli, Sarah H. Wild, Hanneke V. Basart, Wolfgang Rathmann, Harald Grallert, DIAGRAM consortium, Winfried Maerz, Marcus E. Kleber, Bernhard O. Boehm, Annette Peters, Peter P. Pramstaller, Michael A. Province, Ingrid B. Borecki, Nicholas D. Hastie, Igor Rudan, Harry Campbell, Hugh Watkins, Martin Farrall, Michael Stumvoll, Luigi Ferrucci, Dawn M. Waterworth, Richard N. Bergman, Francis S. Collins, Jaakko Tuomilehto, Richard M. Watanabe, Eco J. C. de Geus, Brenda W. Penninx, Albert Hofman, Ben A. Oostra, Bruce M. Psaty, Peter Vollenweider, James F. Wilson, Alan F. Wright, G. Kees Hovingh, Andres Metspalu, Matti Uusitupa, Patrik K. E. Magnusson, Kirsten O. Kyvik, Jaakko Kaprio, Jackie F. Price, George V. Dedoussis, Panos Deloukas, Pierre Meneton, Lars Lind, Michael Boehnke, Alan R. Shuldiner, Cornelia M. van Duijn, Andrew D. Morris, Anke Toenjes, Patricia A. Peyser, John P. Beilby, Antje Körner, Johanna Kuusisto, Markku Laakso, Stefan R. Bornstein, Peter E. H. Schwarz, Timo A. Lakka, Rainer Rauramaa, Linda S. Adair, George Davey Smith, Tim D. Spector, Thomas Illig, Ulf de Faire, Anders Hamsten, Vilmundur Gudnason, Mika Kivimaki, Aroon Hingorani, Sirkka M. Keinänen-Kiukaanniemi, Timo E. Saaristo, Dorret I. Boomsma, Kari Stefansson, Pim van der Harst, Josée Dupuis, Nancy L. Pedersen, Naveed Sattar, Tamara B. Harris, Francesco Cucca, Samuli Ripatti, Veikko Salomaa, Karen L. Mohlke, Beverley Balkau, Philippe Froguel, Anneli Pouta, Marjo-Riitta Jarvelin, Nicholas J. Wareham, Nabila Bouatia-Naji, Mark I. McCarthy, Paul W. Franks, James B. Meigs, Tanya M. Teslovich, Jose C. Florez, Claudia Langenberg, Erik Ingelsson, Inga Prokopenko, Inês Barroso

### **The ReproGen Consortium**

*Perry, J.R. et al. Parent-of-origin-specific allelic associations among 106 genomic loci for age at menarche. Nature 514, 92-7 (2014).*

Perry JR, Day F, Elks CE, Sulem P, Thompson DJ, Ferreira T, He C, Chasman DI, Esko T, Thorleifsson G, Albrecht E, Ang WQ, Corre T, Cousminer DL, Feenstra B, Franceschini N, Ganna A, Johnson AD, Kjellqvist S, Lunetta KL, McMahon G, Nolte IM, Paternoster L, Porcu E, Smith AV, Stolk L, Teumer A, Tšernikova N, Tikkanen E, Ulivi S, Wagner EK, Amin N, Bierut LJ, Byrne EM, Hottenga JJ, Koller DL, Mangino M, Pers TH, Yerges-Armstrong LM, Hua Zhao J, Andrulis IL, Anton-Culver H, Atsma F, Bandinelli S, Beckmann MW, Benitez J, Blomqvist C, Bojesen SE, Bolla MK, Bonanni B, Brauch H, Brenner H, Buring JE, Chang-Claude J, Chanock S, Chen J, Chenevix-Trench G, Collée JM, Couch FJ, Couper D, Coviello AD, Cox A, Czene K, D'adamo AP, Davey Smith G, De Vivo I, Demerath EW, Dennis J, Devilee P, Dieffenbach AK, Dunning AM, Eiriksdottir G, Eriksson JG, Fasching PA, Ferrucci L, Flesch-Janys D, Flyger H, Foroud T, Franke L, Garcia ME, García-Closas M, Geller F, de Geus EE, Giles GG, Gudbjartsson DF, Gudnason V, Guénel P, Guo S, Hall P, Hamann U, Haring R, Hartman CA,



Heath AC, Hofman A, Hooning MJ, Hopper JL, Hu FB, Hunter DJ, Karasik D, Kiel DP, Knight JA, Kosma VM, Kutalik Z, Lai S, Lambrechts D, Lindblom A, Mägi R, Magnusson PK, Mannermaa A, Martin NG, Masson G, McArdle PF, McArdle WL, Melbye M, Michailidou K, Mihailov E, Milani L, Milne RL, Nevanlinna H, Neven P, Nohr EA, Oldehinkel AJ, Oostra BA, Palotie A, Peacock M, Pedersen NL, Peterlongo P, Peto J, Pharoah PD, Postma DS, Pouta A, Pylkäs K, Radice P, Ring S, Rivadeneira F, Robino A, Rose LM, Rudolph A, Salomaa V, Sanna S, Schlessinger D, Schmidt MK, Southey MC, Sovio U, Stampfer MJ, Stöckl D, Storniolo AM, Timpson NJ, Tyrer J, Visser JA, Vollenweider P, Völzke H, Waeber G, Waldenberger M, Wallaschofski H, Wang Q, Willemsen G, Winqvist R, Wolffenbuttel BH, Wright MJ; Australian Ovarian Cancer Study; GENICA Network; kConFab; LifeLines Cohort Study; InterAct Consortium; Early Growth Genetics (EGG) Consortium, Boomsma DI, Econs MJ, Khaw KT, Loos RJ, McCarthy MI, Montgomery GW, Rice JP, Streeten EA, Thorsteinsdottir U, van Duijn CM, Alizadeh BZ, Bergmann S, Boerwinkle E, Boyd HA, Crisponi L, Gasparini P, Gieger C, Harris TB, Ingelsson E, Järvelin MR, Kraft P, Lawlor D, Metspalu A, Pennell CE, Ridker PM, Snieder H, Sørensen TI, Spector TD, Strachan DP, Uitterlinden AG, Wareham NJ, Widen E, Zygumunt M, Murray A, Easton DF, Stefansson K, Murabito JM, Ong KK.

### **The VAT/SAT Consortium**

*Fox, C.S. et al. Genome-wide association for abdominal subcutaneous and visceral adipose reveals a novel locus for visceral fat in women. PLoS Genet 8, e1002695 (2012).*

Fox CS, Liu Y, White CC, Feitosa M, Smith AV, Heard-Costa N, Lohman K; GIANT Consortium; MAGIC Consortium; GLGC Consortium, Johnson AD, Foster MC, Greenawalt DM, Griffin P, Ding J, Newman AB, Tylavsky F, Miljkovic I, Kritchevsky SB, Launer L, Garcia M, Eiriksdottir G, Carr JJ, Gudnason V, Harris TB, Cupples LA, Borecki IB.

## **DETAILED AUTHORSHIP CONTRIBUTIONS**

### **Steering Committee Overseeing the Consortium**

Ruth J.F. Loos

### **Writing Group**

Yingchang Lu, Felix R. Day, Stefan Gustafsson, Martin L. Buchkovich, Jianbo Na, Karen L Mohlke, M Carola Zillikens, John Andrew Pospisilik, Cecilia Lindgren, Tuomas Oskari Kilpeläinen, Ruth J.F. Loos

### **Data Cleaning and Preparation**

Felix R. Day, Stefan Gustafsson, Ruth J.F. Loos, Yingchang Lu, Ryan W Walker

### **GWAS and Metabochip Meta-analyses**

Felix R. Day, Stefan Gustafsson, Yingchang Lu

### **GWAS Look-ups in Other Consortia**

(ADIPOGen Consortium) Zari Dastani, Rui Li, John Brent Richards, ADIPOGen Consortium; (CARDIOGRAMplusC4D) Stavroula Kanoni, Panos Deloukas, CARDIOGRAMplusC4D; (CHARGE: CRP meta-analysis) Abbas Dehghan, Chen Lu, CHARGE Inflammation working group; (CHARGE: IGF GWAS meta-analysis) Alexander Teumer, Qibin Qi, Robert C. Kaplan; (CHARGE: testosterone meta-analysis) Robin Haring, Claes Ohlson, CHARGE sex hormone working group; (Cutaneous nevi and melanoma risk ) Mingfeng Zhang, Xin Li, David Hunter, Jiali Han; (Cutaneous nevi and melanoma risk ) Pirro G Hysi, Veronique Bataille, Tim David Spector, Mario Falchi, Marianna Sanna; (Cutaneous nevi and melanoma risk ) Mark M Iles, D Timothy Bishop, Julia A Newton Bishop, GenoMEL Consortium; (DIAGRAM consortium) Teresa Ferreira, Andrew P Morris, DIAGRAM consortium; (Early Growth Genetics Consortium) Diana L Cousminer, Elisabeth Widén, Early Growth Genetics Consortium; (GIANT Consortium) Adam Locke, Tõnu Esko, Dmitry Shungin, GIANT Consortium; (GLOBAL LIPIDS) Ellen M Schmidt, Cristen J Willer, Global Lipids Genetics Consortium; (LEPGen Consortium) Tuomas O. Kilpeläinen; (Liver enzyme GWAS meta-analysis) Weihua Zhang, William R Scott, John C Chambers, Jaspal S Kooner; (MAGIC) Inga Prokopenko, Reedik Mägi, Vasiliki Lagou, MAGIC Consortium; (ReproGen Consortium) John R.B. Perry, Joanne M. Murabito, Ken K. Ong, Reprogen Consortium; (VATGen consortium) Charles C. White, Douglass P Kiel, Adrienne Cupples, Caroline S Fox, VATGen consortium; (Tooth development in infancy meta-analysis) David M Evans, Ghazaleh Fatemifar.

### **Gene Expression (eQTL) Analyses**

(Cortical brain study) Jinghua Zhao; (Blood-Eqtl meta-analysis) Tonu Esko, Andres Metspalu, Harm-Jan Westra, Lude Franke; (Bariatric Surgery Study) Eric E. Schadt; (MolOBB) Alexander W Drong, Fredrik Karpe, Åsa K Hedman, Mark I McCarthy.

### **Other Analyses and Contributions**

(DEPICT) Tune H Pers, Juha Karjalainen, Lude Franke, Joel N Hirschhorn; (Drosophila knockdown and screening) Jianbo Na, John Andrew Pospisilik; (ENCODE) Martin L. Buchkovich, Terrence S Furey, Karen L Mohlke; (Functional Annotation) Ruth J.F. Loos, Yingchang Lu; (GCTA-COJO analysis) Zhihong Zhu, Anna AE Vinkhuyzen, Jian Yang; (GWAS Catalog Updates) Anne E Justice, Yingchang Lu, Kari E North; (IPA Pathway and Network Analysis) Yingchang Lu.

### **Project Design, Management and Coordination of Contributing Studies**

(AGES); (Amish) Alan R Shudiner; (BASEII) Lars Bertram, Ilja Demuth, Rahel Eckardt, Elisabeth Steinhagen-Thiessen; (BLSA) Luigi Ferrucci; (B-PROOF) Lisette CPGM de Groot, Rosalie AM Dhonukshe-Rutten, Nathalie van der Velde, Natasja M van Schoor; (CHS); (CoLaus) Peter Vollenweider; (COROGENE CTRLS) Katja Borodulin, Markus Perola, Veikko Salomaa, Erkki Vartiainen; (CROATIA-Vis) Igor Rudan; (DESIR) Philippe Froguel; (DILGOM) Pekka Jousilahti, Aarno Palotie; (Ely/Fenland/EPIC (metabohip)) Nita G Forouhi, Claudia Langenberg, Ruth J.F. Loos, Ken K Ong, Robert A Scott, Nicholas J Wareham; (ERF) Ben A. Oostra, Cornelia M. van Duijn; (FamHS) Ingrid B Borecki; (Fels Longitudinal Study) Stefan A Czerwinski, Bradford Towne; (Fenland (GWAS)) Nicholas J Wareham; (FRAM) Douglass P Kiel, Caroline S Fox; (GxE); (GOOD) Claes Ohlsson; (H ) Markku Heliövaara, Antti Jula, Paul B Knekt, Seppo Koskinen, Samuli Ripatti; (HABC); (HBCS) Johan G Eriksson, Tom Forsen, Eero Kajantie, Clive Osmond; (HEALTH ) Torben Hansen, Torben Jørgensen, Allan Linneberg, Oluf Borbye Pedersen; (HERITAGE Family Study) Tuomo Rankinen, Claude Bouchard, DC Rao, **Treva K Rice**; (Johnston County Osteoarthritis Project) Joanne M. Jordan; (KoGES) Nam H Cho; (KORA F + KORA S /F (GWAS)) Angela Döring; (KORA F + KORA S /F (metabohip)) Christian Gieger, Annette Peters, Konstantin Strauch; (LEIPZIG\_ADULT\_IFB) Michael Stumvoll, Yvonne Boettcher; (LOLIPOP) John C Chambers, Jaspal S Kooner; (GOYA) Torben Hansen, Thorkild I A Sørensen; (MAP) David A Bennett; (METSIM); (MrOS) Eric S. Orwoll; (ORCADES) Harry Campbell, Nicholas Hastie, Sarah Wild, James F Wilson, Alan F Wright; (PIVUS) Erik Ingelsson, Lars Lind; (PREVEND) Ron T Gansevoort, Pim van der Harst; (QFS) Claude Bouchard, Louis Pérusse, Angelo Tremblay, Marie-Claude Vohl; (RISC); (RS) Albert Hofman, André G. Uitterlinden; (SHIP/SHIP-TREND) Henry Völzke, Henri Wallaschofski; (SOF) Steven R. Cummings, Gregory J. Tranah; (Sorbs) Michael Stumvoll; (SPT) Colin A McKenzie, Richard S Cooper, Joel N Hirschhorn; (TwinsUK) Tim D Spector; (ULSAM) Erik Ingelsson; (Whitehall II) Aroon Hingorani, Mika Kivimäki, Nicholas Wareham; (YFS) Mika Kähönen, Terho Lehtimäki, Olli T Raitakari, Jorma S Viikari.

### **Genotyping of Contributing Studies**

(AGES); (Amish) Jeffrey R O'Connell; (BASEII) Lars Bertram, Tian Liu; (BLSA) Dena Hernandez; (B-PROOF); (CHS); (CoLaus); (COROGENE CTRLS); (CROATIA-Vis) Caroline Hayward, Nina Smolej Narančić, Veronique Vitart; (DESIR) Elodie Eury, Frédéric Fumeron, Stéphane Lobbens; (DILGOM) Peter J Wagner; (Ely/Fenland/EPIC (metabohip)) Claudia Langenberg, Ruth J.F. Loos, Ken K Ong, Nicholas J Wareham; (ERF); (FamHS) Ingrid B Borecki; (Fels Longitudinal Study) John Blangero, Joanne E Curran, Stefan A Czerwinski, Bradford Towne; (Fenland (GWAS)) Nicholas J Wareham; (FRAM) Douglass P Kiel, Caroline S

Fox; (GxE); (GOOD) Claes Ohlsson; (H ); (HABC); (HBCS) Elisabeth Widén; (HEALTH ) Niels Grarup; (HERITAGE Family Study) Tuomo Rankinen; (Johnston County Osteoarthritis Project) Joanne M. Jordan; (KoGES) Nam H Cho, Bok-Ghee Han, Jong-Young Lee; (KORA F + KORA S /F (GWAS)); (KORA F + KORA S /F (metabohip)); (LEIPZIG\_ADULT\_IFB) Michael Stumvoll, Yvonne Boettcher; (LOLIPOP) John C Chambers, Jaspal S Kooner; (GOYA); (MAP) Philip L De Jager; (METSIM); (MrOS) Carrie M. Nielson, Eric S. Orwoll, Joseph M Zmuda; (ORCADES) Harry Campbell, James F Wilson; (PIVUS); (PREVEND) Pim van der Harst; (QFS) Claire Bellis, John Blangero; (RISC) Laura Pascoe, Mark Walker; (RS) Carolina Medina-Gomez, Fernando Rivadeneira; (SHIP/SHIP-TREND) Nele Friedrich; (SOF) Gregory J. Tranah; (Sorbs) Peter Kovacs, Michael Stumvoll, Anke Tönjes; (SPT); (TwinsUK) Pirro G Hysi, Cristina Menni; (ULSAM); (Whitehall II) Meena Kumari, Claudia Langenberg; (YFS) Terho Lehtimäki.

### **Phenotype Coordination of Contributing Studies**

(AGES); (Amish) Alan R Shudiner; (BASEII) Ilja Demuth, Rahel Eckardt, Dominik Spira, Elisabeth Steinhagen-Thiessen; (BLSA) Luigi Ferrucci; (B-PROOF) Anke W Enneman, Karin MA Swart; (CHS); (CoLaus); (COROGENE CTRLS) Katja Borodulin, Aki S Havulinna, Tiina Laatikainen, Veikko Salomaa; (CROATIA-Vis) Ivana Kolcic, Ozren Polašek; (DESIR); (DILGOM) Satu Männistö; (Ely/Fenland/EPIC (metabohip)) Nita G Forouhi, Nicholas J Wareham; (ERF) M Carola Zillikens; (FamHS) Ingrid B Borecki; (Fels Longitudinal Study) Audrey C Choh, Stefan A Czerwinski; (Fenland (GWAS)) Nicholas J Wareham; (FRAM) Douglass P Kiel, Caroline S Fox; (GxE); (GOOD) Claes Ohlsson, Liesbeth Vandenput; (H ); (HABC); (HBCS) Johan G Eriksson, Jari Lahti; (HEALTH ) Torben Jørgensen, Allan Linneberg; (HERITAGE Family Study) Tuomo Rankinen, Claude Bouchard; (Johnston County Osteoarthritis Project) Joanne M. Jordan; (KoGES) Nam H Cho, Hyung Jin Choi, Bok-Ghee Han, Jong-Young Lee, Chan Soo Shin; (KORA F + KORA S /F (metabohip)) Harald Grallert, Peter Lichtner; (LEIPZIG\_ADULT\_IFB) Anke Tönjes, Matthias Blüher, Yvonne Boettcher; (LOLIPOP) Uzma Afzal, John C Chambers, Jaspal S Kooner, Laticia Oozageer; (GOYA) Thorkild I A Sørensen; (MAP) Aron S Buchman; (METSIM) Johanna Kuusisto, Markku Laakso; (MrOS) Christine G. Lee, Eric S. Orwoll; (ORCADES) Sarah Wild, James F Wilson; (PIVUS) Karl Michaëlsson; (PREVEND) Stephan JL Bakker, Ron T Gansevoort, Hans Hillege; (QFS) Claude Bouchard, Angelo Tremblay; (RISC) Laura Pascoe, Mark Walker; (RS) Carolina Medina-Gomez, Fernando Rivadeneira, M Carola Zillikens; (SHIP/SHIP-TREND) Simone Gärtner, Till Ittermann; (SOF) Steven R. Cummings; (Sorbs) Matthias Blüher, Peter Kovacs, Anke Tönjes; (SPT) Terrence Forrester; (TwinsUK) Pirro G Hysi, Massimo Mangino; (ULSAM) Tommy Cederholm, Karl Michaëlsson; (Whitehall II) Meena Kumari, Mika Kivimäki; (YFS) Mika Kähönen, Olli T Raitakari, Leena Taittonen, Jorma S Viikari.

### **Data Analysis**

(AGES); (Amish) Jeffrey R O'Connell; (BASEII) Lars Bertram, Tian Liu; (BLSA) Toshiko Tanaka; (B-PROOF) Anke W Enneman, Karin MA Swart; (CHS) Robert C Kaplan, Barbara McKnight; (CoLaus); (COROGENE CTRLS) Markus Perola; (CROATIA-Vis) Caroline Hayward, Veronique Vitart; (DESIR) Amélie Bonnefond, Loïc Yengo; (DILGOM) Niina Eklund, Kati Kristiansson; (Ely/Fenland/EPIC (metabohip)) Jian'an Luan; (ERF) Ayse Demirkan; (FamHS) Mary F Feitosa; (Fels Longitudinal Study) John Blangero, Audrey C Choh, Jack W Kent; (Fenland

(GWAS)) Jian'an Luan; (FRAM) Douglass P Kiel, Caroline S Fox; (GxE); (GOOD) Claes Ohlsson, Liesbeth Vandenput; (H ) Emmi Tikkanen; (HABC); (HBCS) Jari Lahti; (HEALTH ) Tarunveer Singh Ahluwalia; (HERITAGE Family Study) Yun Ju Sung, DC Rao, Tuomo Rankinen; (Johnston County Osteoarthritis Project) Youfang Liu; (KoGES) Nam H Cho, Hyung Jin Choi, Bok-Ghee Han, Jong-Young Lee, Chan Soo Shin; (KORA F + KORA S /F (GWAS)) Brigitte Kühnel, Janina S. Ried; (LEIPZIG\_ADULT\_IFB) Anubha Mahajan, Inga Prokopenko; (LOLIPOP) Marie Loh, Weihua Zhang; (GOYA) Tarunveer Singh Ahluwalia, Tuomas Oskari Kilpeläinen, Lavinia Paternoster; (MAP) Lei Yu; (METSIM) Michael Boehnke, Anne U Jackson, Teemu Kuulasmaa; (MrOS) Christine G. Lee, Carrie M. Nielson, Priya Srikanth; (ORCADES); (PIVUS) Stefan Gustafsson; (PREVEND) Irene Mateo Leach, Pim van der Harst, Niek Verweij; (QFS) John Blangero, Louis Pérusse; (RISC) Laura Pascoe, Mark Walker; (RS) Carolina Medina-Gomez, Fernando Rivadeneira; (SHIP/SHIP-TREND) Alexander Teumer; (SOF) Daniel S. Evans; (Sorbs) Reedik Mägi, Inga Prokopenko; (SPT) Cameron D Palmer; (TwinsUK) Massimo Mangino; (ULSAM) Stefan Gustafsson; (Whitehall II) Jian'An Luan; (YFS) Terho Lehtimäki, Leo-Pekka Lyytikäinen, Olli T Raitakari.
